# Supplementary material for: Horizontal transfer and evolution of the biosynthetic gene cluster for benzoxazinoids in plants
Source: PubMed Central journal article supplement — Plant Commun. 2022 Mar 25;3(3):100320. doi: 10.1016/j.xplc.2022.100320 (PMC9251436; doi:10.1016/j.xplc.2022.100320), 2022-03-25
Supplement: mmc1.pdf [file mmc1.pdf]

**Plant Communications, Volume 3**

**Supplemental information**

**Horizontal transfer and evolution of the biosynthetic gene cluster for  
benzoxazinoids in plants**

**Dongya Wu, Bowen Jiang, Chu-Yu Ye, Michael P. Timko, and Longjiang Fan**

# **Horizontal Transfer and Evolution of the Biosynthetic Gene Cluster for Benzoxazinoid in Plants**

Dongya Wu, Bowen Jiang, Chu-Yu Ye, Michael P. Timko, Longjiang Fan\*

\*Correspondence: [fanlj@zju.edu.cn](mailto:fanlj@zju.edu.cn) (L.F.)

## **Supplemental Figures and Tables**

Sub-family

- Oryzoideae
- Bambusoideae
- Pooideae
- Panicoideae
- Chloridoideae

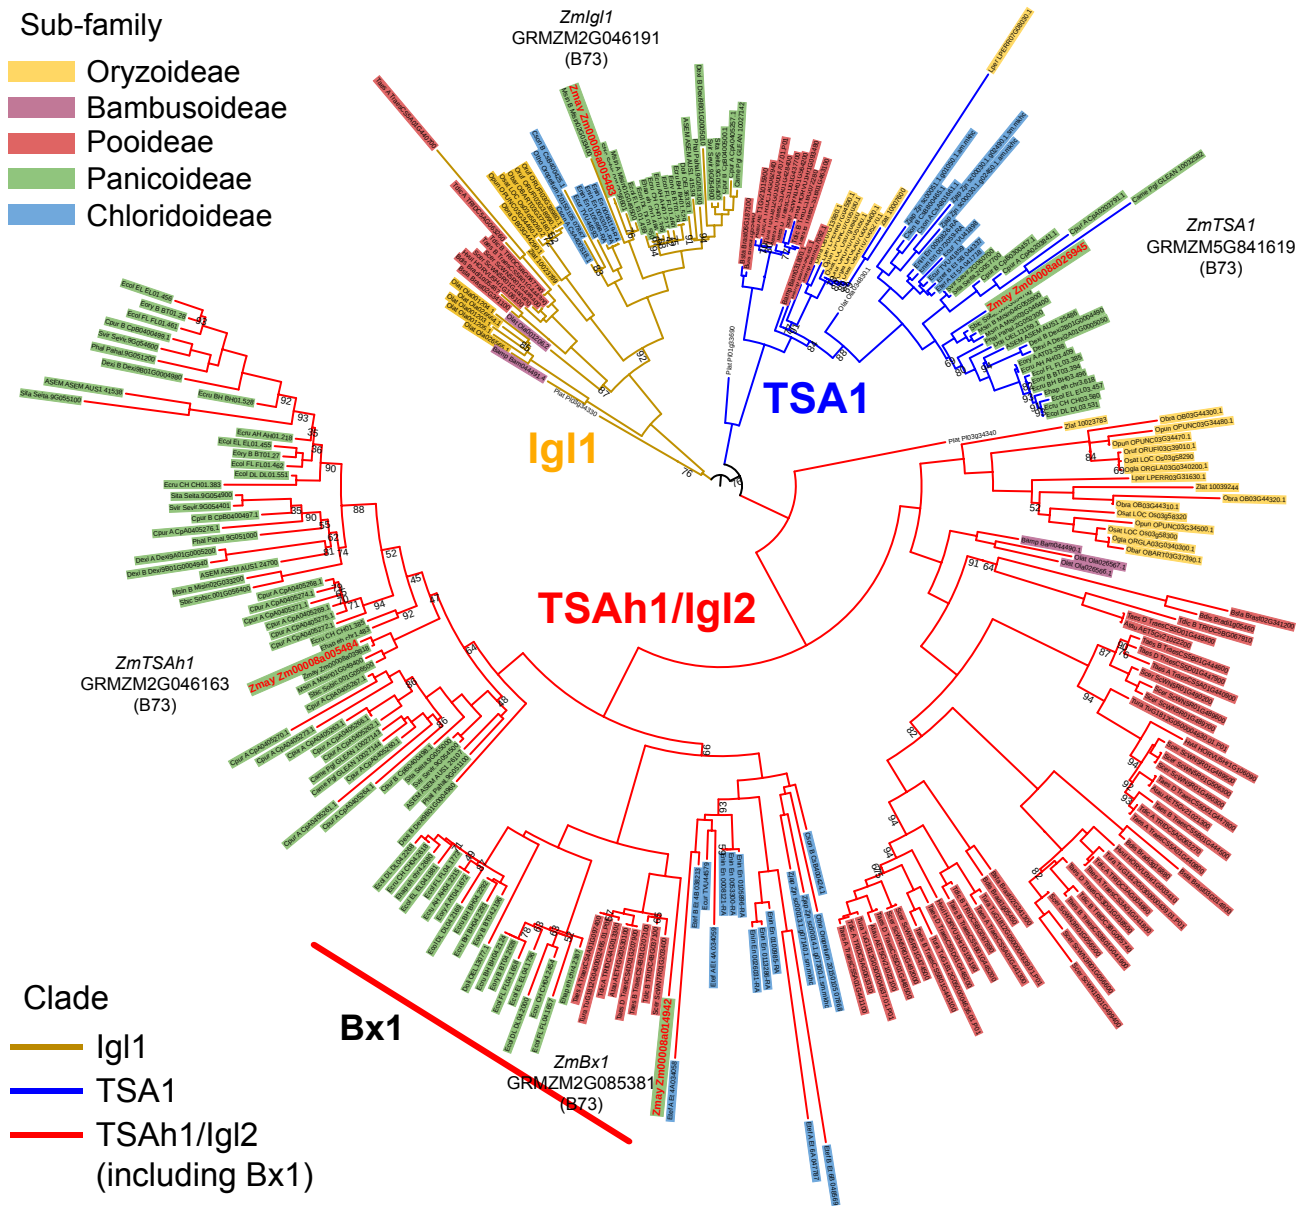

Clade

- Igl1
- TSA1
- TSAh1/Igl2 (including Bx1)

**Supplemental Figure 1** Maximum-likelihood phylogenetic tree of *Bx1* homologs. Three clades (Igl1, TSA1 and TSAh1) are indicated by branch colors. The sub-family information is shown by the background colors of labels. The Bx1 clade is highlighted by a red bold line. Bootstrap values less than 95 are shown on branches.

```

*           20           40           60           *
N1 : MAFALKASPYLSSSSAAASS-----SSSPALLPLPGQHAS-----ARVSRPQAAITAPLAMGQA : 55
N2 : MATTTMKASP---MSASSSS-----APVLRRCVAVQPAR---VAAARRLAAAAASVALEASVPVA : 53
N3 : MAYA-VKASP---SSSAPS-----LPFRRRAAGAVV---TAGRRVKVRAALAAAALDPAAPA : 51
N4 : MAFALKASPSSTSSSSAPSHPRLRSAAAMAMPFGPAPASRAVA---AASAAASLEPAVVVPSPDSYWR : 68
N5 : MAF-ALKAS--PSTSSSSLAVQ-----SOLERRAAAVATM---PARRRAAAVRVMAITAAAPFA : 53
N6 : MAF-ALKAASYS--FSPADQ-----PSLSLAATAAVKMPAGRGKAAAAVVIRAVAAAAPLS : 58
N7 : MALFAVQAASSTSSSSPAVLQ-----QSPLPSRAAAAAVKMPQR--KKAADVRAVAAPPAPV : 62
N8 : MAS-ALKAASSTSSSSPAAVH-----SSPLSKLPAAVA---MPGR-RRSVATVRAVAAPPAPFA : 58
B1 : -----
B2 : MAF-ALNLS--CYPSFS-----SLLPWMAAAVMI---PRRRNVLPV--TKAVAVAPPA : 47
B3 : MAF-ALKTS--FSASFSQAGPSS-----SLLPRR-----RNGVSV--IRAVATVSTS : 43
B4 : MAF-SLNLN--SSPSFQAQSS-----SLLPRRLSAAVVTK---PRPRNVFV--IRAVATVVS-- : 49
      ma          a                      r

*           80           100          120          140
N1 : ---AAAEKCN-VSQTFSRLRKCKGTAFIPYITAGDPDIAATTAALKLLDYCGADVIELGIPYSDLELDG : 123
N2 : A---AAAVERRMSVSOTMSKLKEKGKTAFIPIYITAGDPDMGTTAEALRLLDAGCGADVIELGVPSDFYADG : 122
N3 : P---AAAGKRGRLSVSOTLSSHREKGTAFIPYITAGDPDLETTAEALRLLDAGCGADVIELGVPSDFYADG : 120
N4 : PLPLTPASERIPVAQAMSRARAHGKTAFIPIYITAGDPDLETTAEALRLLDAGCGADVIELGVPSDFYADG : 140
N5 : BAPARPAAGRC-LPVSOTFAKLKAKGKTAFIPIYITAGDPDIAATTAELRVLDAAGCGADVIELGVPSDFYADG : 124
N6 : BAPARSAAGRC-LPVSOTMARLKAQKGTAFIPYITAGDPDIAATTAELRLLDAGCGADVIELGVPSDFYADG : 129
N7 : BGPFPKNGERCRLPVSOTMSRLKAQKGTAFIPYITAGDPDIAATTAELRLLDAGCGADVIELGVPSDFYADG : 134
N8 : KLTAG-AGGRC-LPVSOTMSRLRAQKGTAFIPYITAGDPDIAATTAELRLLDAGCGADVIELGVPSDFYADG : 128
B1 : -----MAAMAKGKTAFIPIYITAGDPDIAATTAELRLLDAGCGADVIELGVPSDFYADG : 54
B2 : BAPAKPFAVRSR-PVSVTMAKIMAKGKTAFIPIYITAGDPDIAATTAELRLLDAGCGADVIELGVPSDFYADG : 118
B3 : BAPAKPFAVTTLPVSEETIAKIMAKGKTAFIPIYITAGDPDIAATTAELRLLDAGCGADVIELGVPSDFYADG : 115
B4 : -BAPAKPFAVRCR--PVSDTIAKIMAKGKVVVCTLYVA-----HVVGS-TLELCIT- : 94
      a          vs t l Gkta ipy tagdp ttaeal ld cGadv6ELG6p sdp dg

*           160          180          200          *
N1 : PVIQASASRALAKC--ATDITMAMLKEVVEHLSCPVVLTYYNPIVRRGVAANTAAAKBAGAHGLIVPDLF : 193
N2 : PVIQASASRALAAG--ATPEAVLSMLKEVTEHLSCPVVLSYLGPIVRRGVAANTAAAKBAGVQGLIVPDLF : 192
N3 : PVIQASASRALAGG--ATADGVMSMLKEVTEHLSCPVVLSYFGPIVRRGVAASVTAAVKEAGVQGLIVPDLF : 190
N4 : AVIQASAKRALAAG--ATDAMVMSMLKEVTEHLSCPVVLSYFNPIVRRGTRSFAAAARBAGVKGGLIIPDLF : 210
N5 : PVIQASASRALASG--TTFDGVLMMLKEVTEHLSCPVVLSYFKPILCRGTSDFATAAKBAGHGLIVPDLF : 194
N6 : PVIQASARALASG--TTFDGVLMMLKEVTEHLSCPVVLSYFNPIVRRGADFAAAAKBAGAHGLIVPDLF : 199
N7 : PVIQASMARARTTCGGATPDGVLMMLKEVTEHLSCPVVLSYFNPIVRRGTPGFAAAAVKBAGAHGLIVPDLF : 206
N8 : PVIQASARALASG--TTFDGVLMMLKEVTEHLSCPVVLSYFNPIVRRGADFAAAAVKBAGVHGLIVPDLF : 198
B1 : PVIQASARALASG--TMDAVLMMLKEVTEHLSCPVVLSYMKPIVRRG-----AEMKBAGVHGLIVPDLF : 120
B2 : PVIQASARALAGG--ATMDGVLMMLKEVTEHLSCPVVLSYMRPILCRG-----AETKBAGVHGLIVPDLF : 184
B3 : PVIQASARALAGG--TMDGVLMMLKEVTEHLSCPVVLSYMKPIFCQGI-----AETKBAGVHGLIVPDLF : 181
B4 : PVIQASARALAGG--TMDGVLMMLKEVTEHLSCPVVLSYMKPIIFKGI-----AETKBAGVHGLIVPDLF : 160
      p 6QAS RAla G T d v6 ML4EvtFeLSCPv66f3Y PI g A 4eAG GL66PDLF

*           220          240          260          *
N1 : LENAGIL--RNSIKNNLELVLLTTPAIPEDRMKEITKASEGFVYLVSVNGVTGERANVNRVQVHLLQIHK : 263
N2 : YVDTCTF--RSEAIKNNLELVLLTTPAIPEDRMKEITKASEGFVYLVSVNGVTGERPKVNRVHLLQIHL : 262
N3 : YVETCEF--RNSIKNNLELVLLTTPAIPEDRMKEITKASEGFVYLVSVNGVTGERANVNRVQVHLLQIHR : 260
N4 : HDEIRAF--RKEAIKNNLELVLLTTPAIPEDRMKEITKASEGFVYLVSVNGVTGERANVNRVQVHLLQIHR : 280
N5 : CVAECTL--KSEAMKNNLELVLLTTPAIPEDRMKEITKASEGFVYLVSVNGVTGERANLNSRVOSLQIHKV : 264
N6 : YGATCAL--RSEAIKNNLELVLLTTPAIPEDRMKEITKASEGFVYLVSVNGVTGERANVNRVOSLQIHKV : 269
N7 : YADTCAL--RSEAIKNNLELVLLTTPAIPEDRMKEITKASEGFVYLVSVNGVTGSRADVNRVOSLQIHKV : 276
N8 : YGNSCALTLRTEAIKNNLELVLLTTPAIPEDRMKEITKASEGFVYLVSVNGVTGERANVNRVOSLQIHKV : 270
B1 : YVAASHL--WSEAKNNLELVLLTTPAIPEDRMKEITKASEGFVYLVSVNGVTGERANVNRVOSLQIHKV : 190
B2 : YVAAHAL--WSEAKNNLELVLLTTPAIPEDRMKEITKASEGFVYLVSVNGVTGERANVNRVOSLQIHKV : 254
B3 : YVAAHAM--WSEAKNNLELVLLTTPAIPEDRMKEITKASEGFVYLVSVNGVTGERANVNRVOSLQIHKV : 251
B4 : YVAAHAL--WSDAKNNLELVLLTTPAIPEDRMKEITKASEGFVYLVSVNGVTGERANVNSHVSLLQIHKV : 230
      y          ea n lELVLLTTP tP RM It As GF6Ylv36 GVTG R 6N rv l6qe64

*           300          320          340          *
N1 : VTDKAVAVGFGISTPEHVQQAQWAGADGVIIIGSAMVROLGEAASPKQ-----GLRR----- : 314
N2 : VTDKAVAVGFGISTPEHVRQIAQWAGADGVIIIGSAMVROLGEAASPKQ-----GLKR----- : 313
N3 : VTDKAVAVGFGISTPEHVRQIAQWAGADGVIIIGSAMVROLGEAASPKQ-----GLRR----- : 311
N4 : VTDKELAVGFGISTPEHVSQISEWAGADGVIIIGSAMVROLGEAASPRE-----GLKR----- : 331
N5 : VTDKPVAVGFGISKPEHVQQAQWAGADGVIIIGSAMVROLERLALS--HRGPTSRHARTRMLYSKFRVRRNLFI : 336
N6 : VTDKPVAVGFGISKPEHVQQAQWAGADGVIIIGSAMVROLGEAASPKQ-----GLKR----- : 320
N7 : VTDKPVAVGFGISKPEHVQQAQWAGADGVIIIGSAMVROLGEAASPKQ-----GLKR----- : 327
N8 : VTDIPVAVGFGISKPEHVQQAQWAGADGVIIIGSAMVROLGEAASPKQ-----GLKR----- : 321
B1 : VTNKPVAVGFGISKPEHVQ-----OLGEAASPKQ-----GLRR----- : 223
B2 : VTDKPVAVGFGISKPEHVQQAQWAGADGVIIIGSAMVROLGEAASPRE-----GLKR----- : 305
B3 : VTDKPVAVGFGISKPEHVQQAQWAGADGVIIIGSAMVROLGEAASPKQ-----GLKR----- : 302
B4 : VTDKPVAVGFGISKPEHVQQAQWAGADGVIIIGSAMVROLGEAASPKQ-----GLKR----- : 281
      VT k 6avGFGIS P HV q a wgaDgviigsamv Qlgea sp G64R

```

**Supplemental Figure 2** Alignment of amino acid sequences of *Bx1* genes (B) and native homologs (N). See detailed sequences ID in Figure 2A.

**A**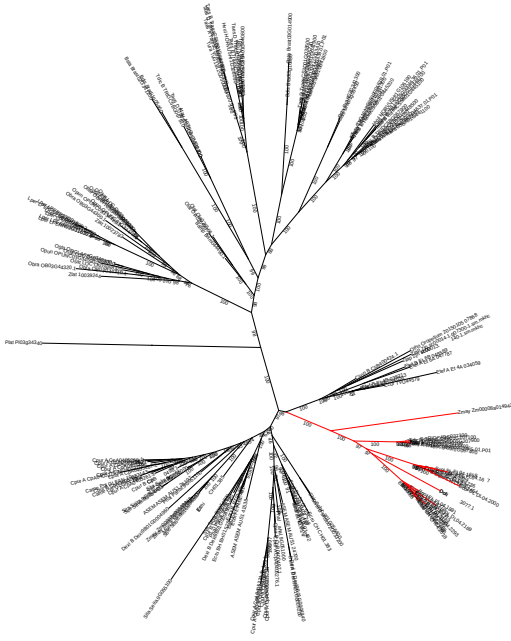**B**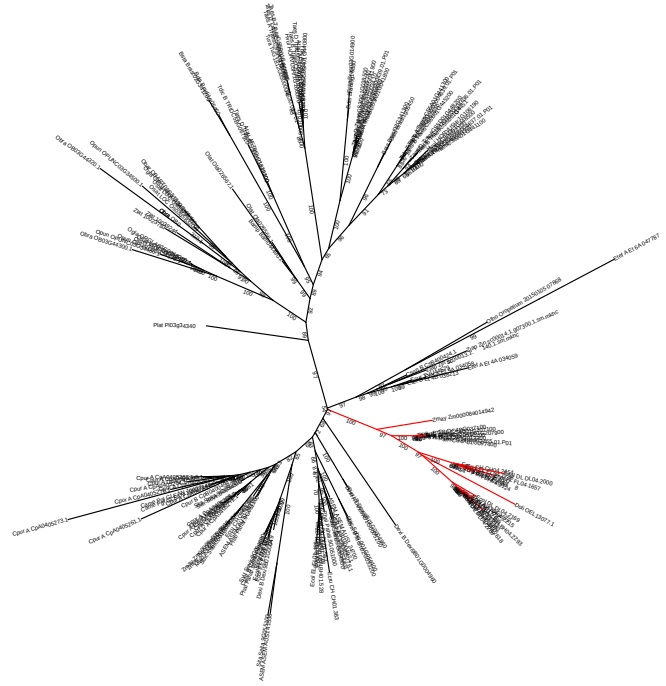

**Supplemental Figure 3** Phylogenies of *Bx1* based on CDS (A) and codon12 (B) datasets. Red branches indicate the *Bx1* clade. Bootstrap values are shown on branches.

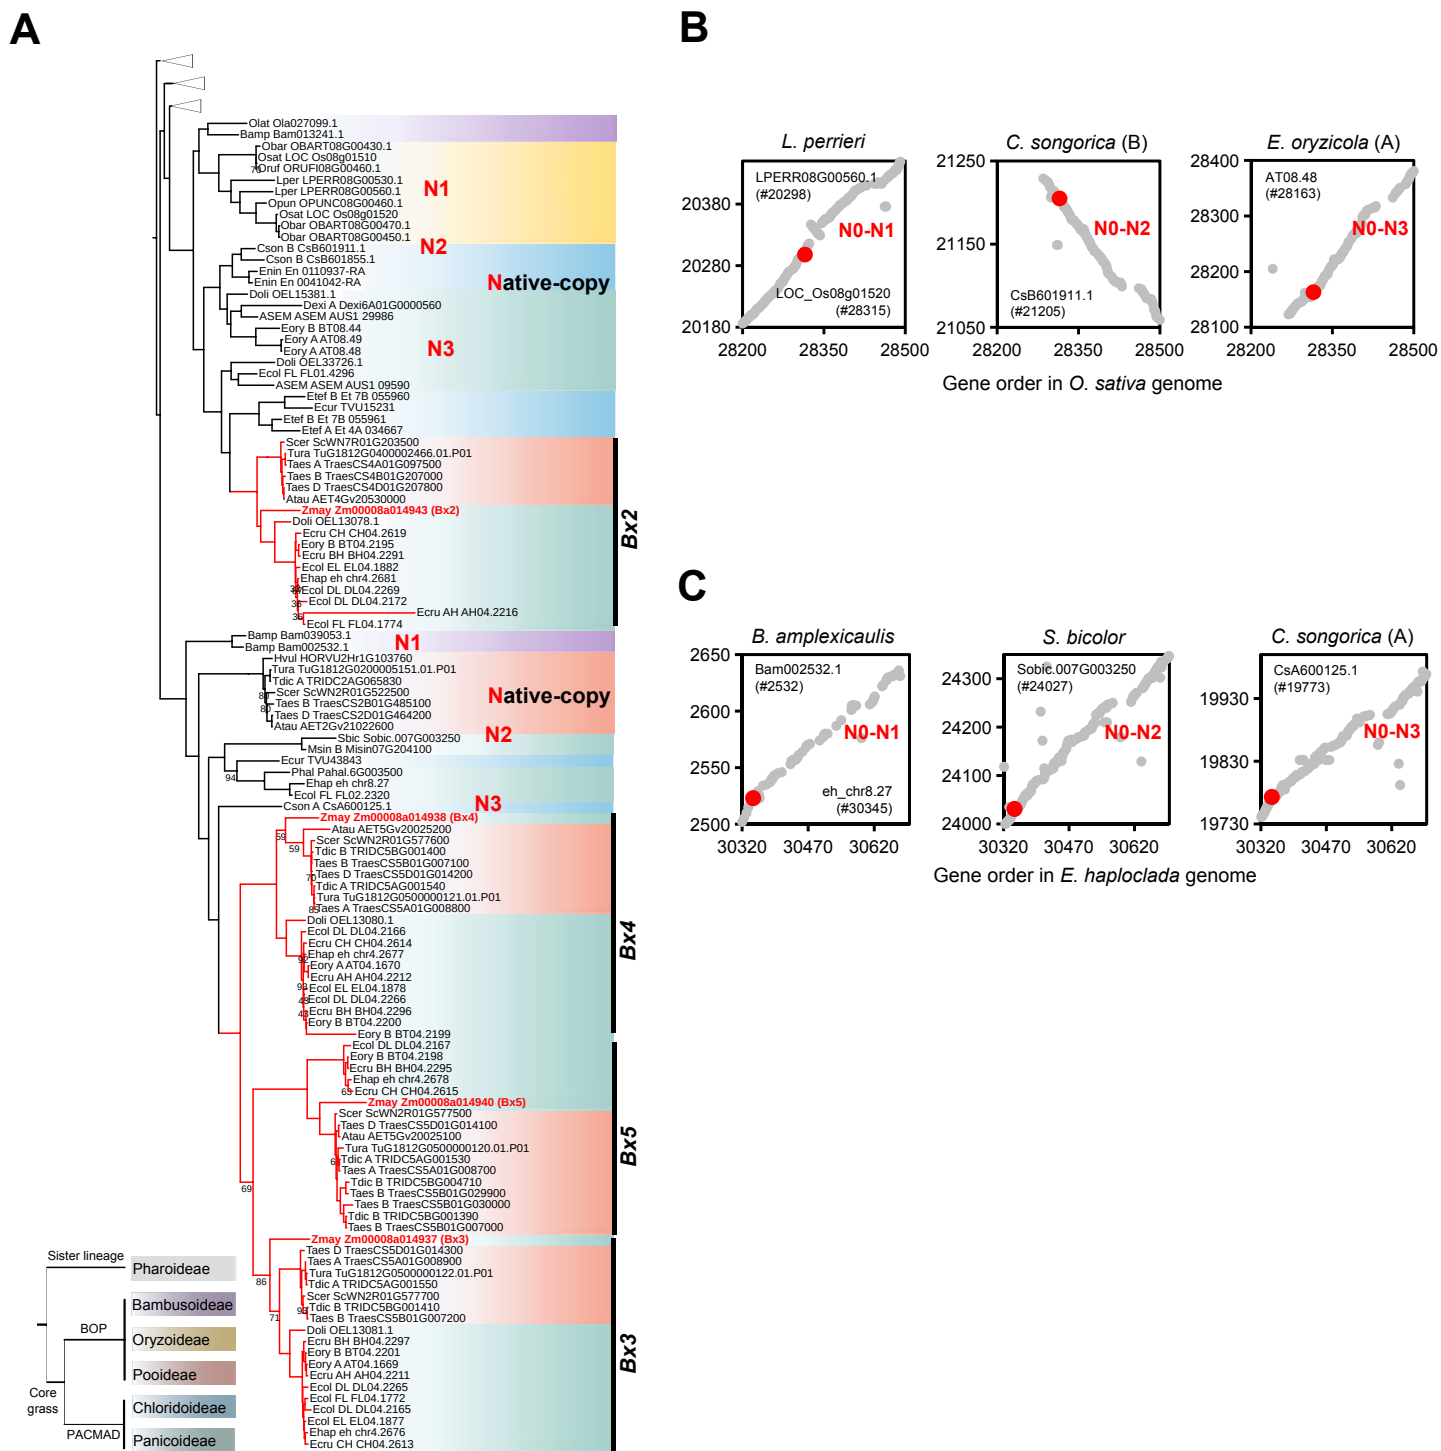

**Supplemental Figure 4** Phylogeny of *Bx2* to *Bx5* homologs (A) and genomic synteny of *Bx2* (B) and *Bx5* (C) regions across the grass family. The branches of *Bx2* and *Bx3*-*Bx5* clades are highlighted by red. Bootstrap values less than 95 are shown on branches.

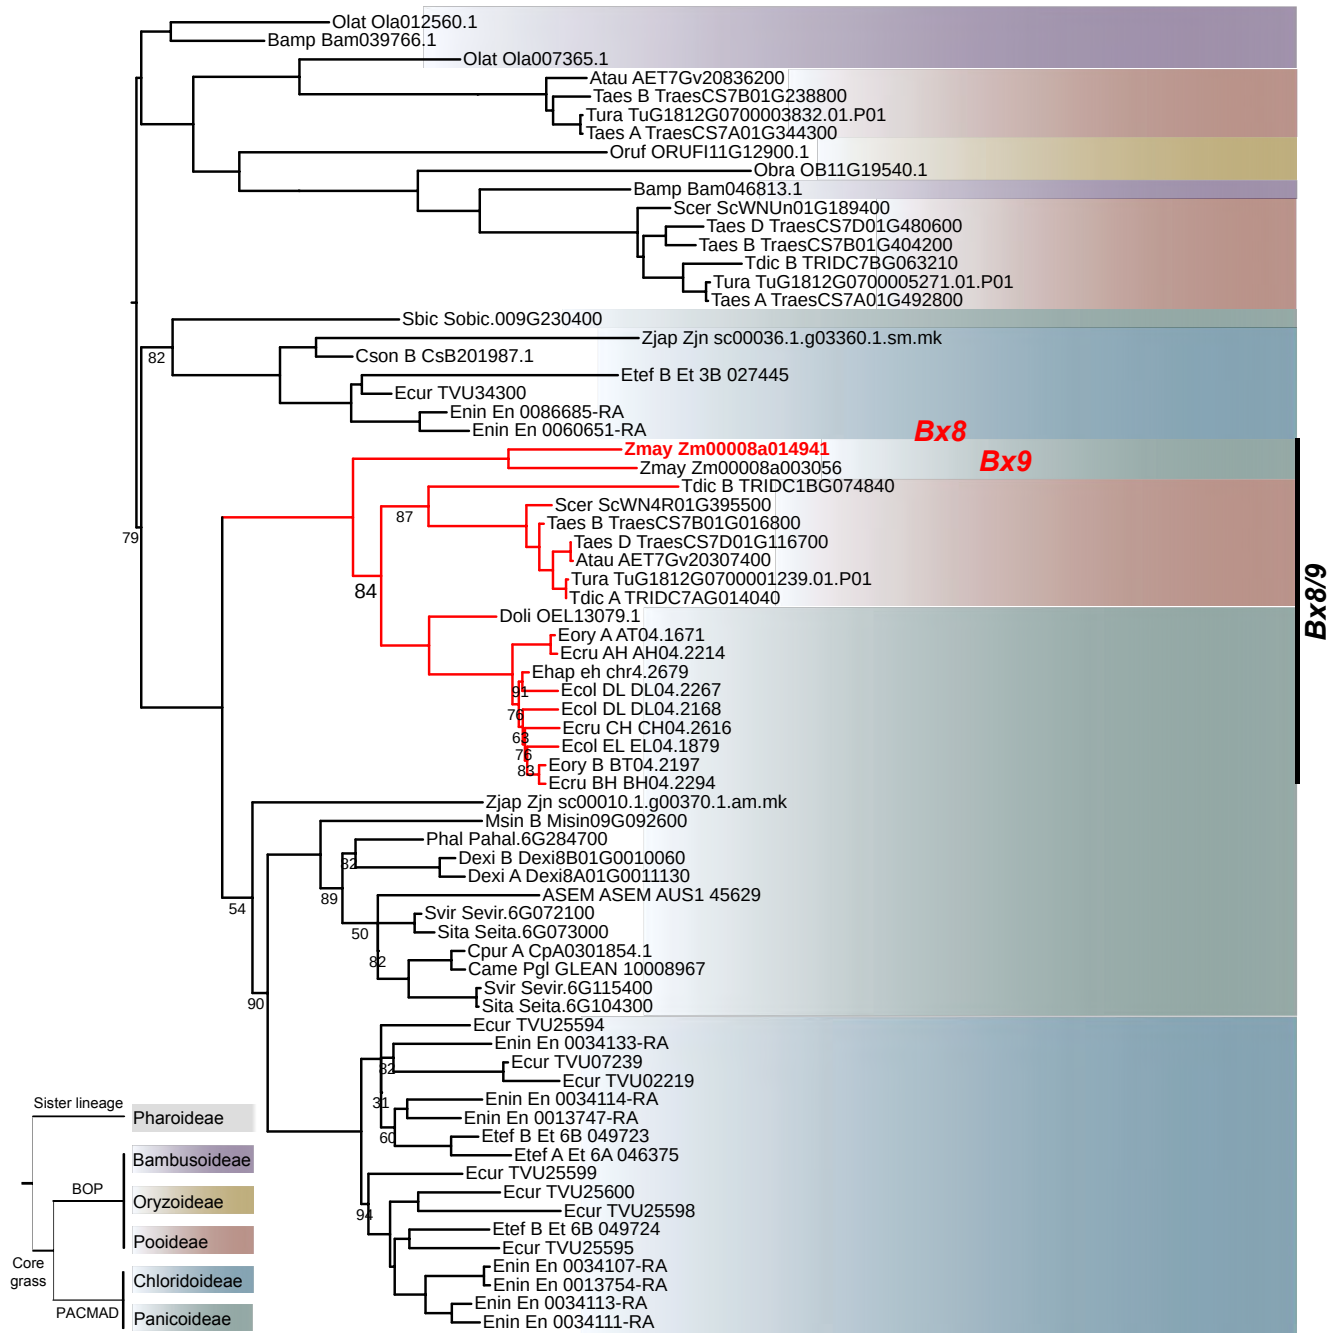

**Supplemental Figure 5** Phylogeny of *Bx8* and *Bx9* homologs across the whole grass family. The branches of *Bx8/Bx9* clade are highlighted by red. Bootstrap values less than 95 are shown on branches.

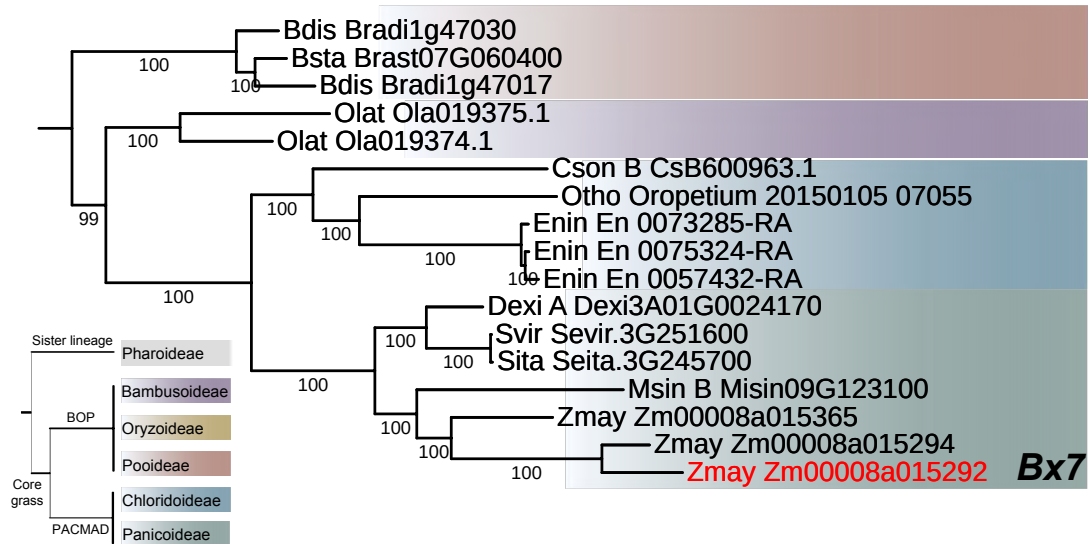

**Supplemental Figure 6** Phylogeny of *Bx7* homologs across the grass family.



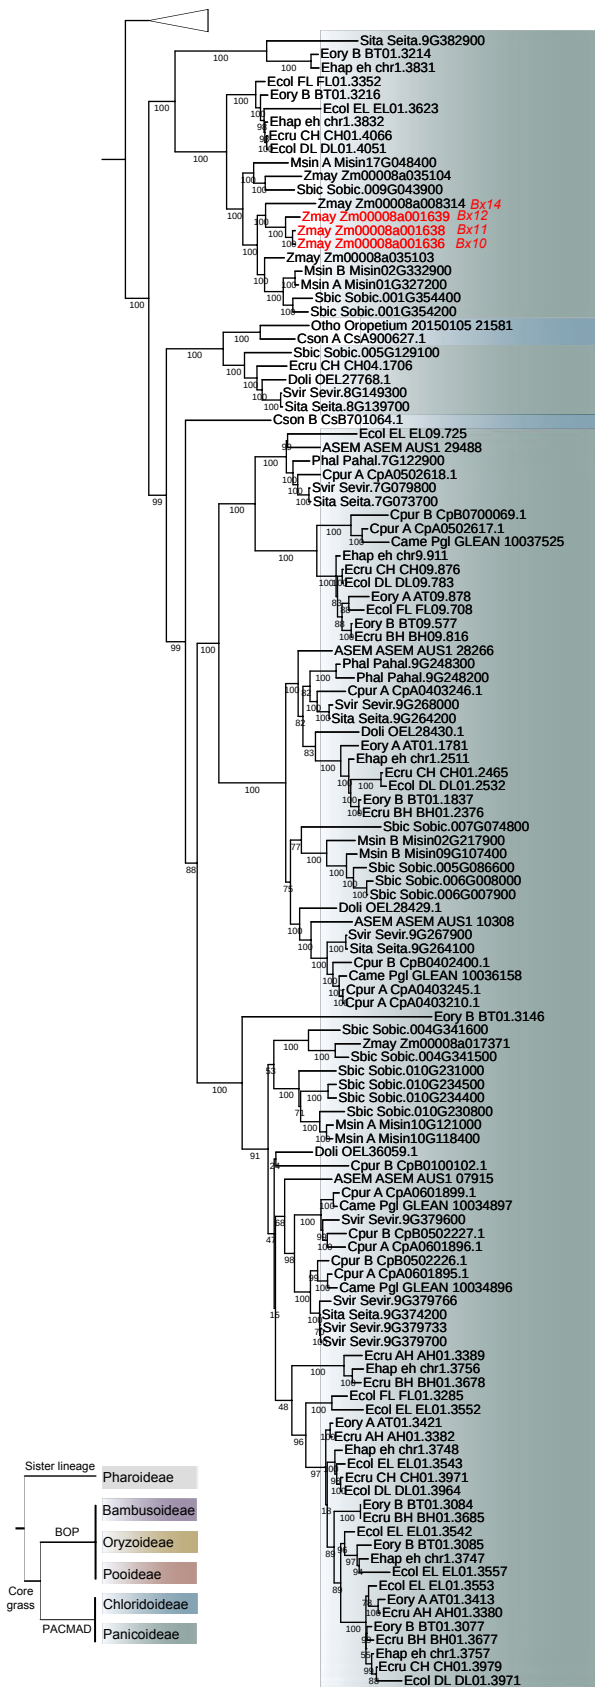

Bx10/11/12/14

Supplemental Figure 7 Phylogeny of Bx10 to Bx12 and Bx14 homologs across the whole grass family.

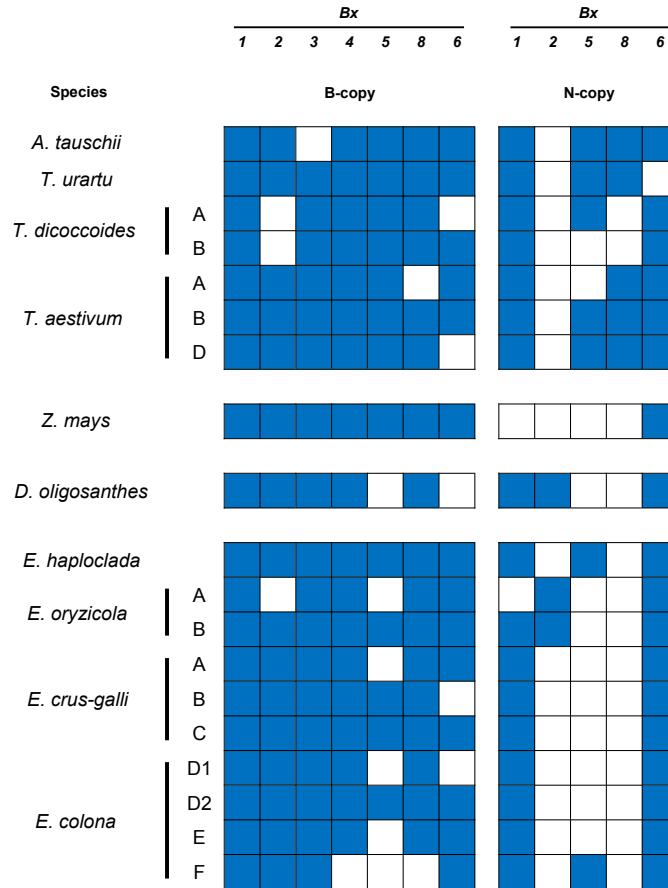

**Supplemental Figure 8** Presence and absence of Bx genes (B-copy) and native homologs (N-copy) in Triticeae and Panicoideae. Blue grids represent presence and white represent absence.

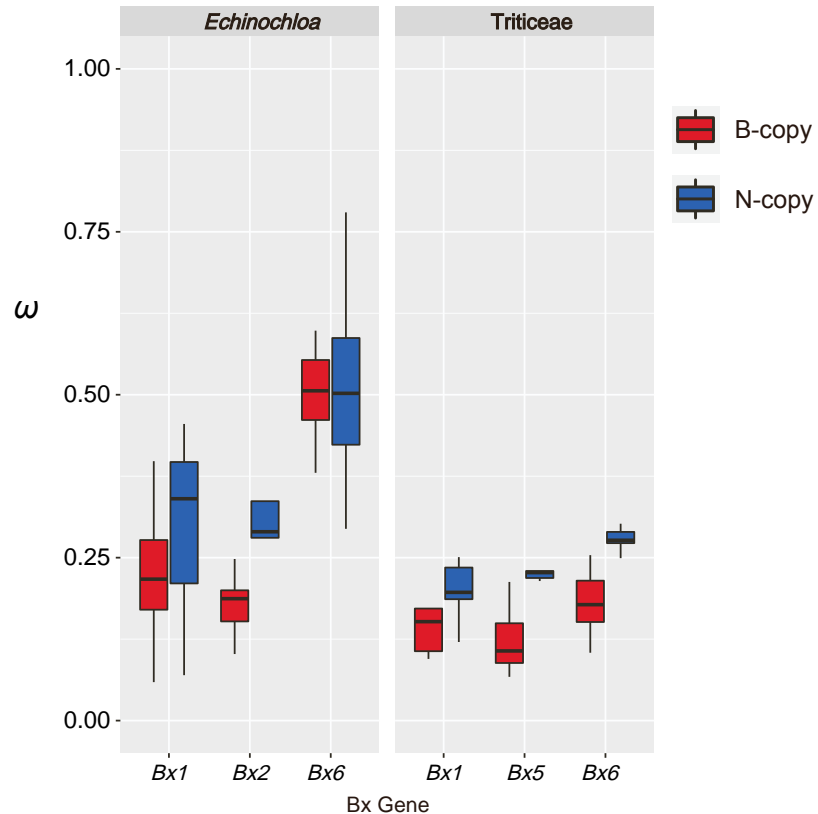

**Supplemental Figure 9** Selection pressure on Bx genes in *Echinochloa* and Triticeae. In the box plots, the horizontal line shows the median value, and the whiskers show the 25% and 75% quartile values of  $\omega$ . B-copy, Bx genes; N-copy, native homologs of Bx genes.

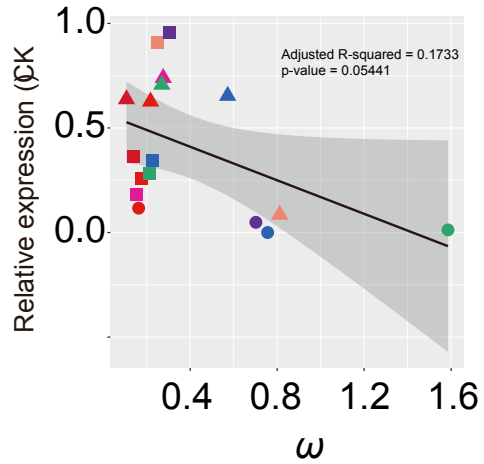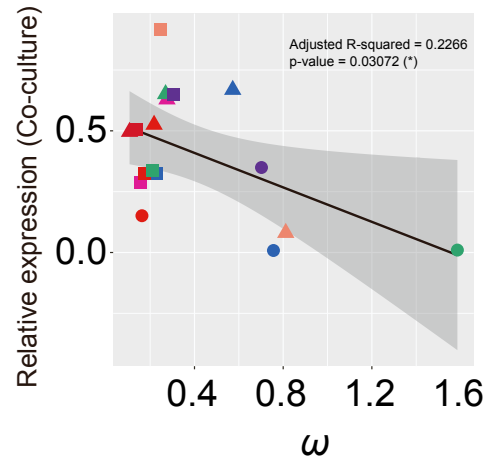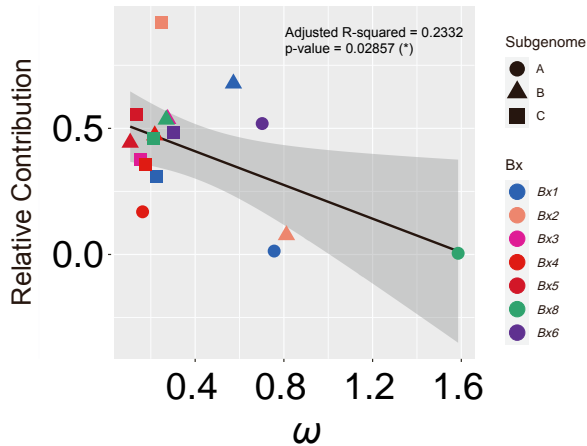

**Supplemental Figure 10** Negative relationship between selection indicator  $\omega$  values and gene expression or response dominance in *E. crus-galli*.

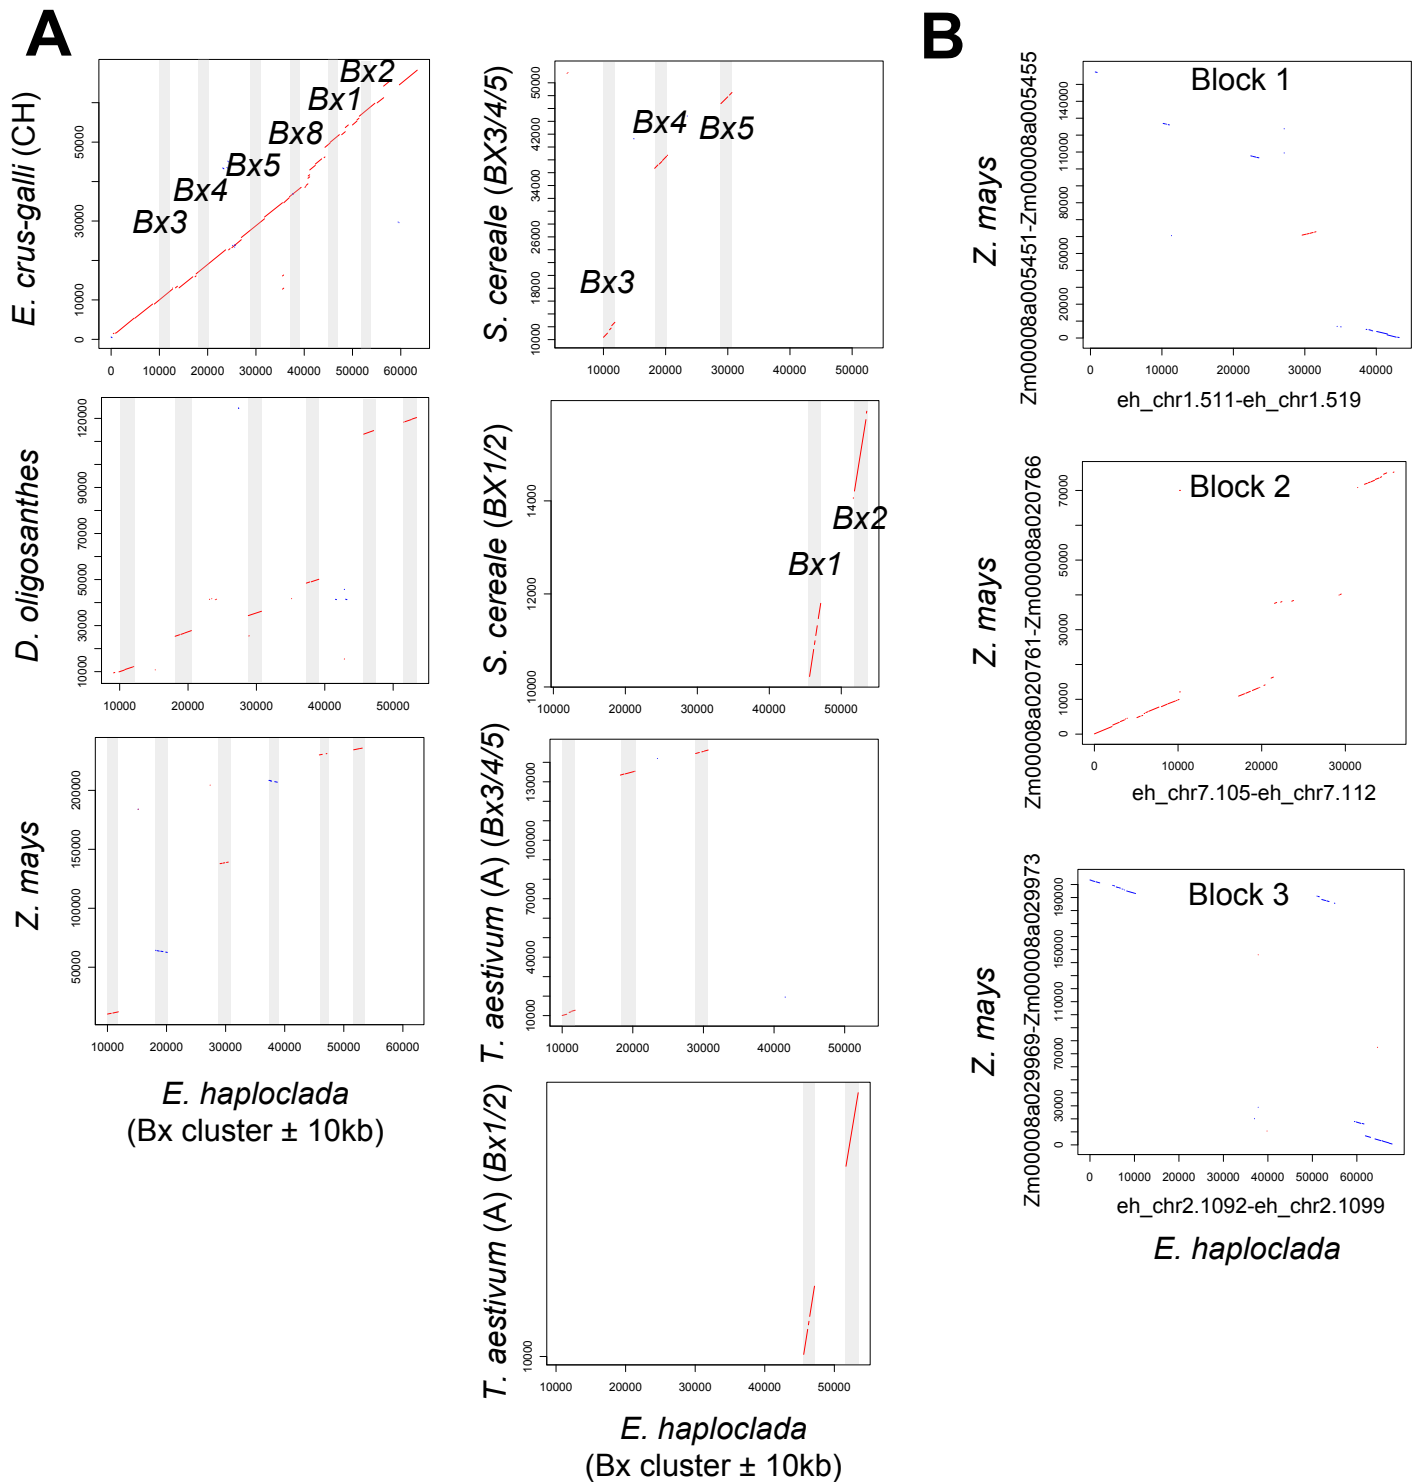

**Supplemental Figure 11** Genomic synteny among Bx cluster elements (gene and intergenic regions) in grass genomes based on nucleotide sequences. **(A)** the synteny plots between Bx clusters from *E. haploclada* and other grass genomes (*E. crus-galli* CH, *D. oligosanthos*, *Z. mays*, *S. cereale* and *T. aestivum* A). The gray shadows indicate the positions of Bx genes in *E. haploclada* (from left to right: Bx3, Bx4, Bx5, Bx8, Bx1 and Bx2). Red and blue colors represent consistent and opposite orientations between two collinear genetic elements, respectively. **(B)** Synteny plots of three randomly selected evolutionarily conserved blocks between *E. haploclada* and *Z. mays*. The genomic region information is shown near the axis.

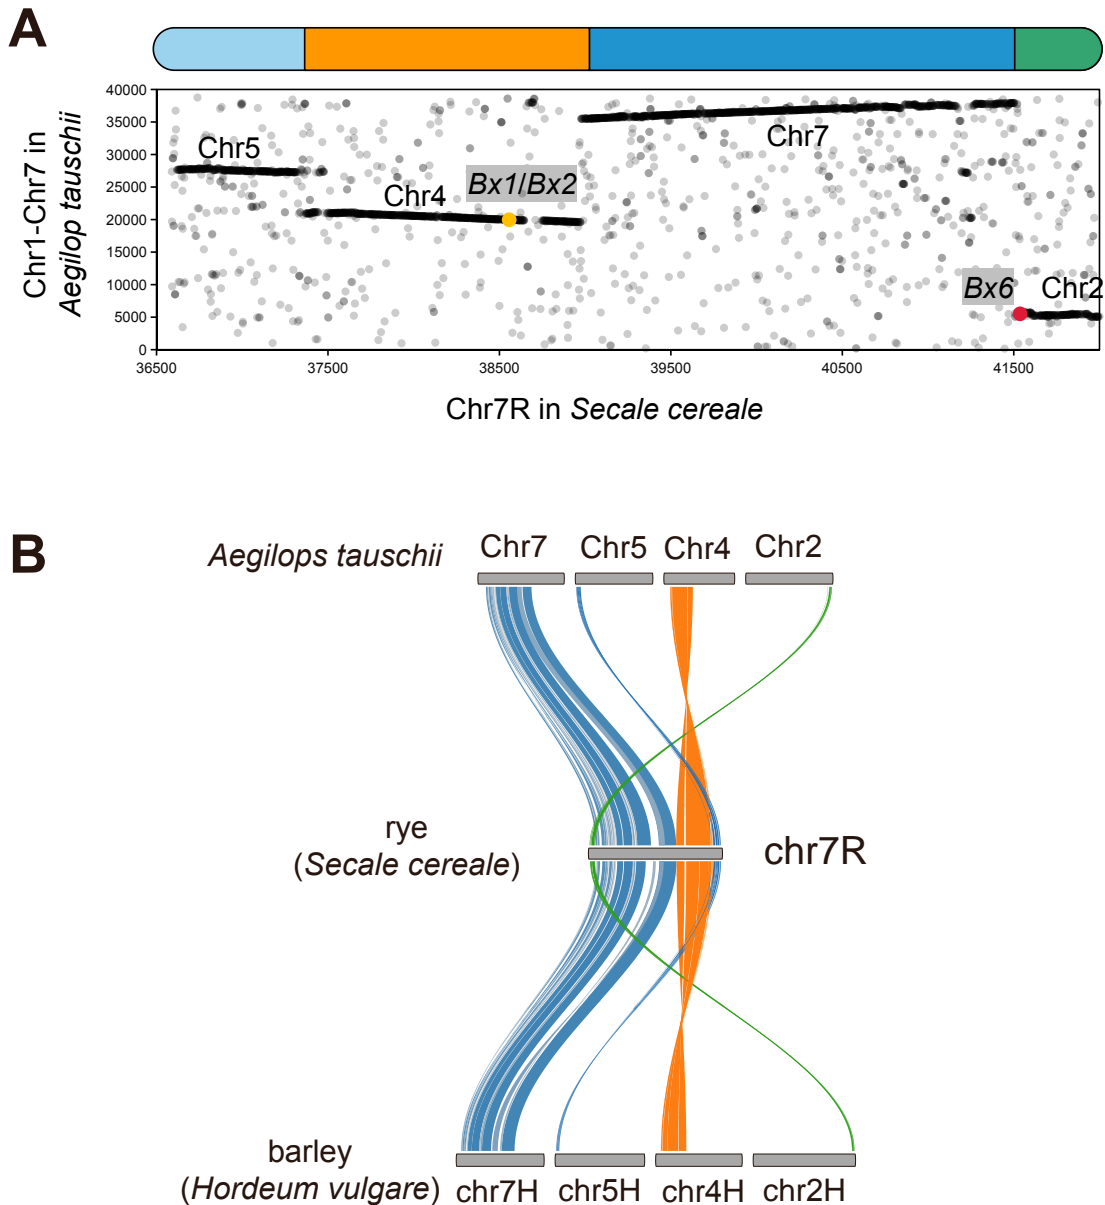

**Supplemental Figure 12** Genomic synteny between chromosome 7R in rye (*S. cereale*) and other Triticeae genomes. **(A)** Chromosome 7R in rye is syntenic to chromosomes 5, 4, 7 and 2 in *Triticum/Aegilops*. *Bx1* and *Bx2* are located on chromosome 4 and *Bx6* on chromosome 2 in *Triticum/Aegilops*, while they all are on chromosome 7R in *Secale*. **(B)** Synteny among *A. tauschii*, *S. cereale* and *H. vulgare* genomes. Considering *Hordeum* is the outgroup genus of *Secale* and *Aegilops*, the chromosomal fusions of 7R in rye are *Secale*-specific.

**Supplemental Table 1. A list of plant genomes used in this study**

| Lineage                | Sub-family               | Species                           | Ploid      | Assembly level | Version          | Genome Abbr.           |
|------------------------|--------------------------|-----------------------------------|------------|----------------|------------------|------------------------|
| Outgroup               | Bromeliaceae             | <i>Ananas comosus</i>             | 2          | chromosome     | F153             | Acom                   |
| Pharoideae             | Pharoideae               | <i>Pharus latifolius</i>          | 2          | chromosome     | 60161            | Plat                   |
| BOP                    | Bambusoideae             | <i>Olyra latifolia</i>            | 2          | scaffold       | /                | Olat                   |
|                        |                          | <i>Bonia amplexicaulis</i>        | 6          | scaffold       | /                | Bamp                   |
|                        | Oryzoideae               | <i>Leersia perrieri</i>           | 2          | chromosome     | GCA_000325765.3  | Lper                   |
|                        |                          | <i>Oryza barthii</i>              | 2          | chromosome     | GCA_000182155.2  | Obar                   |
|                        |                          | <i>Oryza brachyantha</i>          | 2          | chromosome     | GCA_000231095.2  | Obra                   |
|                        |                          | <i>Oryza glaberrima</i>           | 2          | chromosome     | GCA_000576495.1  | Ogla                   |
|                        |                          | <i>Oryza punctata</i>             | 2          | chromosome     | GCA_000573905.1  | Opun                   |
|                        |                          | <i>Oryza rufipogon</i>            | 2          | chromosome     | GCA_000817225.1  | Oruf                   |
|                        |                          | <i>Oryza sativa</i>               | 2          | chromosome     | v7.0             | Osat                   |
|                        | <i>Zizania latifolia</i> | 2                                 | scaffold   | v01            | Zlat             |                        |
|                        | Pooideae                 | <i>Aegilops tauschii</i>          | 2          | chromosome     | v4.0             | Atau                   |
|                        |                          | <i>Brachypodium distachyon</i>    | 2          | chromosome     | v3.1             | Bdis                   |
|                        |                          | <i>Brachypodium stacei</i>        | 2          | chromosome     | v1.1             | Bsta                   |
|                        |                          | <i>Hordeum vulgare</i>            | 2          | chromosome     | /                | Hvul                   |
|                        |                          | <i>Triticum aestivum</i>          | 6          | chromosome     | iwgsc_refseqv1.0 | Taes_A; Taes_B; Taes_D |
|                        |                          | <i>Triticum dicoccoides</i>       | 4          | chromosome     | WEWSeq_v.1.0     | Tdic_A; Tdic_B         |
| <i>Triticum urartu</i> |                          | 2                                 | chromosome | Tu             | Tura             |                        |
| <i>Secale cereale</i>  | 2                        | chromosome                        | Weining    | Scer           |                  |                        |
| PACMAD                 | Panicoideae              | <i>Alloteropsis semialata</i>     | 2          | scaffold       | AUS1_V1.0        | Asem                   |
|                        |                          | <i>Cenchrus americanus</i>        | 2          | chromosome     | Camericanus.prot | Came                   |
|                        |                          | <i>Cenchrus purpureus</i>         | 4          | chromosome     | GWHAORA00000000  | Cpur_A; Cpur_B         |
|                        |                          | <i>Dichantherium oligosanthes</i> | 2          | scaffold       | ASM163321v2      | Doli                   |
|                        |                          | <i>Digitaria exilis</i>           | 4          | chromosome     | CM05836          | Dexi_A; Dexi_B         |
|                        |                          | <i>Miscanthus sinensis</i>        | 4          | chromosome     | v7.1             | Msin_A; Msin_B         |
|                        |                          | <i>Panicum hallii</i>             | 2          | chromosome     | v3.1             | Phal                   |
|                        |                          | <i>Setaria italica</i>            | 2          | chromosome     | v2.2             | Sita                   |
|                        |                          | <i>Setaria viridis</i>            | 2          | chromosome     | v2.1             | Svir                   |

|               |                               |   |            |                 |                           |
|---------------|-------------------------------|---|------------|-----------------|---------------------------|
|               | <i>Sorghum bicolor</i>        | 2 | chromosome | v3.1.1          | Sbic                      |
|               | <i>Zea mays</i>               | 2 | chromosome | PH207_v1.1      | Zmay                      |
|               | <i>Echinochloa haploclada</i> | 2 | chromosome | v1              | Ehap                      |
|               | <i>Echinochloa oryzicola</i>  | 4 | chromosome | v2              | Eory_AT; Eory_BT          |
|               | <i>Echinochloa crus-galli</i> | 6 | chromosome | v3              | Ecru_AH; Ecru_BH; Ecru_CH |
|               | <i>Echibochloa colona</i>     | 6 | chromosome | v1              | Ecol_DL; Ecol_EL; Ecol_FL |
| Chloridoideae | <i>Cleistogenes songorica</i> | 4 | chromosome | GWHANUQ00000000 | Cson_A; Cson_B            |
|               | <i>Eragrostis curvula</i>     | 2 | scaffold   | /               | Ecur                      |
|               | <i>Eragrostis tef</i>         | 4 | chromosome | v3.1            | Etef_A; Etef_B            |
|               | <i>Eragrostis nindensis</i>   | 4 | contig     | v2.1            | Enin                      |
|               | <i>Oropetium thomaeum</i>     | 2 | contig     | Othomaeum       | Otho                      |
|               | <i>Zoysia japonica</i>        | 4 | scaffold   | Zjaponica_r1.1  | Zjap                      |



**Supplemental Table 2. Core Bx genes (*Bx1* to *Bx6* and *Bx8*) and corresponding native homologs in grass genomes**

| Species                | Genome | Bx         | Bx copy               | Chromosome | Native analogues      |                    |
|------------------------|--------|------------|-----------------------|------------|-----------------------|--------------------|
| <i>A. tauschii</i>     |        | <i>Bx1</i> | AET4Gv20530100        | 4D         | AET5Gv21022100        |                    |
|                        |        |            |                       |            | AET5Gv21022200        |                    |
|                        |        |            |                       |            | AET5Gv21021300        |                    |
| <i>T. urartu</i>       |        | <i>Bx1</i> | TuG1812G0400002465.01 | Tu4        | TuG1812G0500004630.01 |                    |
|                        |        |            |                       |            | TuG1812G0500004636.01 |                    |
|                        |        |            |                       |            | TuG1812G0500004637.01 |                    |
|                        |        |            |                       |            | TuG1812G0500004639.01 |                    |
| <i>T. dicoccoides</i>  | A      | <i>Bx1</i> | TRIDC4AG013300        | 4A         | TRIDC5AG063330        |                    |
|                        |        |            |                       |            | TRIDC5AG063270        |                    |
| <i>T. dicoccoides</i>  | B      | <i>Bx1</i> | TRIDC4BG037100        | 4B         | TRIDC5BG067890        |                    |
|                        |        |            |                       |            |                       | TRIDC5BG067900     |
|                        |        |            |                       |            |                       | TRIDC5BG067910     |
| <i>T. aestivum</i>     | A      | <i>Bx1</i> | TraesCS4A01G097400    | chr4A      | TraesCS5A01G441100    |                    |
|                        |        |            |                       |            |                       | TraesCS5A01G441300 |
|                        |        |            |                       |            |                       | TraesCS5A01G440800 |
|                        |        |            |                       |            |                       | TraesCS5A01G440900 |
| <i>T. aestivum</i>     | B      | <i>Bx1</i> | TraesCS4B01G207100    | chr4B      | TraesCS5B01G445100    |                    |
|                        |        |            |                       |            |                       | TraesCS5B01G445200 |
|                        |        |            |                       |            |                       | TraesCS5B01G444500 |
|                        |        |            |                       |            |                       | TraesCS5B01G444600 |
| <i>T. aestivum</i>     | D      | <i>Bx1</i> | TraesCS4D01G207900    | chr4D      | TraesCS5D01G448400    |                    |
|                        |        |            |                       |            |                       | TraesCS5D01G448500 |
|                        |        |            |                       |            |                       | TraesCS5D01G448200 |
|                        |        |            |                       |            |                       | TraesCS5D01G447800 |
|                        |        |            |                       |            |                       | TraesCS5D01G447900 |
| <i>S. cereale</i>      |        | <i>Bx1</i> | ScWN7R01G203400       | 7R         | ScWN5R01G490200       |                    |
|                        |        |            |                       |            | ScWN5R01G489600       |                    |
|                        |        |            |                       |            | ScWN5R01G489700       |                    |
|                        |        |            |                       |            | ScWN5R01G489500       |                    |
|                        |        |            |                       |            | ScWN5R01G506300       |                    |
|                        |        |            |                       |            | ScWN5R01G490300       |                    |
|                        |        |            |                       |            | ScWN5R01G492000       |                    |
| <i>Z. mays</i>         |        | <i>Bx1</i> | Zm00008a014942        | chr04      | Zm00008a005484        |                    |
| <i>D. oligosanthos</i> |        | <i>Bx1</i> | OEL13077.1            | KV783575.1 |                       |                    |
| <i>E. haploclada</i>   |        | <i>Bx1</i> | eh_chr4.2680          | eh_chr4    | eh_chr1.483           |                    |
| <i>E. oryzicola</i>    | AT     | <i>Bx1</i> | AT04.1672             | AT04       |                       |                    |
| <i>E. oryzicola</i>    | BT     | <i>Bx1</i> | BT04.2196             | BT04       | BT01.27               |                    |
|                        |        |            |                       |            |                       | BT01.28            |
| <i>E. crus-galli</i>   | AH     | <i>Bx1</i> | AH04.2215             | AH04       | AH01.218              |                    |
| <i>E. crus-galli</i>   | BH     | <i>Bx1</i> | BH04.2292             | BH04       | BH01.528              |                    |
|                        |        |            | BH04.2293             |            |                       |                    |
| <i>E. crus-galli</i>   | CH     | <i>Bx1</i> | CH04.2618             | CH04       | CH01.385              |                    |
|                        |        |            |                       |            | CH01.383              |                    |

|                        |     |            |                       |            |            |
|------------------------|-----|------------|-----------------------|------------|------------|
| <i>E. colona</i>       | DL1 | <i>Bx1</i> | DL04.2268             | DL04       | DL01.551   |
| <i>E. colona</i>       | DL2 | <i>Bx1</i> | DL04.2169             | DL04       | DL01.551   |
| <i>E. colona</i>       | EL  | <i>Bx1</i> | EL04.1881             | EL04       | EL01.455   |
|                        |     |            |                       |            | EL01.456   |
| <i>E. colona</i>       | FL  | <i>Bx1</i> | FL04.1773             | FL04       | FL01.461   |
|                        |     |            |                       |            | FL01.462   |
| <i>A. tauschii</i>     |     | <i>Bx2</i> | AET4Gv20530000        | 4D         |            |
| <i>T. urartu</i>       |     | <i>Bx2</i> | TuG1812G0400002466.01 | Tu4        |            |
| <i>T. aestivum</i>     | A   | <i>Bx2</i> | TraesCS4A01G097500    | chr4A      |            |
| <i>T. aestivum</i>     | B   | <i>Bx2</i> | TraesCS4B01G207000    | chr4B      |            |
| <i>T. aestivum</i>     | D   | <i>Bx2</i> | TraesCS4D01G207800    | chr4D      |            |
| <i>S. cereale</i>      |     | <i>Bx2</i> | ScWN7R01G203500       | 7R         |            |
| <i>Z. mays</i>         |     | <i>Bx2</i> | Zm00008a014943        | chr04      |            |
| <i>D. oligosanthos</i> |     | <i>Bx2</i> | OEL13078.1            | KV783575.1 | OEL15381.1 |
| <i>E. haploclada</i>   |     | <i>Bx2</i> | eh_chr4.2681          | eh_chr4    |            |
| <i>E. oryzicola</i>    | AT  | <i>Bx2</i> |                       |            | AT08.48    |
|                        |     |            |                       |            | AT08.49    |
| <i>E. oryzicola</i>    | BT  | <i>Bx2</i> | BT04.2195             | BT04       | BT08.44    |
| <i>E. crus-galli</i>   | AH  | <i>Bx2</i> | AH04.2216             | AH04       |            |
| <i>E. crus-galli</i>   | BH  | <i>Bx2</i> | BH04.2291             | BH04       |            |
| <i>E. crus-galli</i>   | CH  | <i>Bx2</i> | CH04.2619             | CH04       |            |
| <i>E. colona</i>       | DL1 | <i>Bx2</i> | DL04.2269             | DL04       |            |
| <i>E. colona</i>       | DL2 | <i>Bx2</i> | DL04.2172             | DL04       |            |
| <i>E. colona</i>       | EL  | <i>Bx2</i> | EL04.1882             | EL04       |            |
| <i>E. colona</i>       | FL  | <i>Bx2</i> | FL04.1774             | FL04       |            |
| <i>T. urartu</i>       |     | <i>Bx3</i> | TuG1812G0500000122.01 | Tu5        |            |
| <i>T. dicoccoides</i>  | A   | <i>Bx3</i> | TRIDC5AG001550        | 5A         |            |
| <i>T. dicoccoides</i>  | B   | <i>Bx3</i> | TRIDC5BG001410        | 5B         |            |
| <i>T. aestivum</i>     | A   | <i>Bx3</i> | TraesCS5A01G008900    | chr5A      |            |
| <i>T. aestivum</i>     | B   | <i>Bx3</i> | TraesCS5B01G007200    | chr5B      |            |
| <i>T. aestivum</i>     | D   | <i>Bx3</i> | TraesCS5D01G014300    | chr5D      |            |
| <i>S. cereale</i>      |     | <i>Bx3</i> | ScWN2R01G577700       | 2R         |            |
| <i>Z. mays</i>         |     | <i>Bx3</i> | Zm00008a014937        | chr04      |            |
| <i>D. oligosanthos</i> |     | <i>Bx3</i> | OEL13081.1            | KV783575.1 |            |
| <i>E. haploclada</i>   |     | <i>Bx3</i> | eh_chr4.2676          | eh_chr4    |            |
| <i>E. oryzicola</i>    | AT  | <i>Bx3</i> | AT04.1669             | AT04       |            |
| <i>E. oryzicola</i>    | BT  | <i>Bx3</i> | BT04.2201             | BT04       |            |
| <i>E. crus-galli</i>   | AH  | <i>Bx3</i> | AH04.2211             | AH04       |            |
| <i>E. crus-galli</i>   | BH  | <i>Bx3</i> | BH04.2297             | BH04       |            |
| <i>E. crus-galli</i>   | CH  | <i>Bx3</i> | CH04.2613             | CH04       |            |
| <i>E. colona</i>       | DL1 | <i>Bx3</i> | DL04.2265             | DL04       |            |
| <i>E. colona</i>       | DL2 | <i>Bx3</i> | DL04.2165             | DL04       |            |
| <i>E. colona</i>       | EL  | <i>Bx3</i> | EL04.1877             | EL04       |            |
| <i>E. colona</i>       | FL  | <i>Bx3</i> | FL04.1772             | FL04       |            |
| <i>A. tauschii</i>     |     | <i>Bx4</i> | AET5Gv20025200        | 5D         |            |
| <i>T. urartu</i>       |     | <i>Bx4</i> | TuG1812G0500000121.01 | Tu5        |            |
| <i>T. dicoccoides</i>  | A   | <i>Bx4</i> | TRIDC5AG001540        | 5A         |            |

|                        |     |            |                       |            |                       |
|------------------------|-----|------------|-----------------------|------------|-----------------------|
| <i>T. dicoccoides</i>  | B   | <i>Bx4</i> | TRIDC5BG001400        | 5B         |                       |
| <i>T. aestivum</i>     | A   | <i>Bx4</i> | TraesCS5A01G008800    | chr5A      |                       |
| <i>T. aestivum</i>     | B   | <i>Bx4</i> | TraesCS5B01G007100    | chr5B      |                       |
| <i>T. aestivum</i>     | D   | <i>Bx4</i> | TraesCS5D01G014200    | chr5D      |                       |
| <i>S. cereale</i>      |     | <i>Bx4</i> | ScWN2R01G577600       | 2R         |                       |
| <i>Z. mays</i>         |     | <i>Bx4</i> | Zm00008a014938        | chr04      |                       |
| <i>D. oligosanthos</i> |     | <i>Bx4</i> | OEL13080.1            | KV783575.1 |                       |
| <i>E. haploclada</i>   |     | <i>Bx4</i> | eh_chr4.2677          | eh_chr4    |                       |
| <i>E. oryzicola</i>    | AT  | <i>Bx4</i> | AT04.1670             | AT04       |                       |
| <i>E. oryzicola</i>    | BT  | <i>Bx4</i> | BT04.2199             | BT04       |                       |
|                        |     |            | BT04.2200             | BT04       |                       |
| <i>E. crus-galli</i>   | AH  | <i>Bx4</i> | AH04.2212             | AH04       |                       |
| <i>E. crus-galli</i>   | BH  | <i>Bx4</i> | BH04.2296             | BH04       |                       |
| <i>E. crus-galli</i>   | CH  | <i>Bx4</i> | CH04.2614             | CH04       |                       |
| <i>E. colona</i>       | DL1 | <i>Bx4</i> | DL04.2266             | DL04       |                       |
| <i>E. colona</i>       | DL2 | <i>Bx4</i> | DL04.2166             | DL04       |                       |
| <i>E. colona</i>       | EL  | <i>Bx4</i> | EL04.1878             | EL04       |                       |
| <i>A. tauschii</i>     |     | <i>Bx5</i> | AET5Gv20025100        | 5D         | AET2Gv21022600        |
| <i>T. urartu</i>       |     | <i>Bx5</i> | TuG1812G0500000120.01 | Tu5        | TuG1812G0200005151.01 |
| <i>T. dicoccoides</i>  | A   | <i>Bx5</i> | TRIDC5AG001530        | 5A         | TRIDC2AG065830        |
| <i>T. dicoccoides</i>  | B   | <i>Bx5</i> | TRIDC5BG001390        | 5B         |                       |
|                        |     |            | TRIDC5BG004710        | 5B         |                       |
| <i>T. aestivum</i>     | A   | <i>Bx5</i> | TraesCS5A01G008700    | chr5A      |                       |
| <i>T. aestivum</i>     | B   | <i>Bx5</i> | TraesCS5B01G007000    | chr5B      | TraesCS2B01G485100    |
|                        |     |            | TraesCS5B01G029900    | chr5B      |                       |
|                        |     |            | TraesCS5B01G030000    | chr5B      |                       |
| <i>T. aestivum</i>     | D   | <i>Bx5</i> | TraesCS5D01G014100    | chr5D      | TraesCS2D01G464200    |
| <i>S. cereale</i>      |     | <i>Bx5</i> | ScWN2R01G577500       | 2R         |                       |
| <i>Z. mays</i>         |     | <i>Bx5</i> | Zm00008a014940        | chr04      |                       |
| <i>E. haploclada</i>   |     | <i>Bx5</i> | eh_chr4.2678          | eh_chr4    | eh_chr8.27            |
| <i>E. oryzicola</i>    | BT  | <i>Bx5</i> | BT04.2198             | BT04       |                       |
| <i>E. crus-galli</i>   | BH  | <i>Bx5</i> | BH04.2295             | BH04       |                       |
| <i>E. crus-galli</i>   | CH  | <i>Bx5</i> | CH04.2615             | CH04       |                       |
| <i>E. colona</i>       | DL2 | <i>Bx5</i> | DL04.2167             | DL04       |                       |
| <i>E. colona</i>       | FL  | <i>Bx5</i> |                       |            | FL02.2320             |
| <i>A. tauschii</i>     |     | <i>Bx8</i> | AET7Gv20307400        | 7D         | AET7Gv20836200        |
| <i>T. urartu</i>       |     | <i>Bx8</i> | TuG1812G0700001239.01 | Tu7        | TuG1812G0700003832.01 |
| <i>T. dicoccoides</i>  | A   | <i>Bx8</i> | TRIDC7AG014040        | 7A         |                       |
| <i>T. dicoccoides</i>  | B   | <i>Bx8</i> | TRIDC1BG074840        | 1B         |                       |
| <i>T. aestivum</i>     | A   | <i>Bx8</i> |                       |            | TraesCS7A01G344300    |
| <i>T. aestivum</i>     | B   | <i>Bx8</i> | TraesCS7B01G016800    | chr7B      | TraesCS7B01G238800    |
| <i>T. aestivum</i>     | D   | <i>Bx8</i> | TraesCS7D01G116700    | chr7D      |                       |
| <i>S. cereale</i>      |     | <i>Bx8</i> | ScWN4R01G395500       | 4R         |                       |
| <i>Z. mays</i>         |     | <i>Bx8</i> | Zm00008a014941        | chr04      |                       |
| <i>D. oligosanthos</i> |     | <i>Bx8</i> | OEL13079.1            | KV783575.1 |                       |
| <i>E. haploclada</i>   |     | <i>Bx8</i> | eh_chr4.2679          | eh_chr4    |                       |
| <i>E. oryzicola</i>    | AT  | <i>Bx8</i> | AT04.1671             | AT04       |                       |

|                        |     |            |                       |         |                    |
|------------------------|-----|------------|-----------------------|---------|--------------------|
| <i>E. oryzipicola</i>  | BT  | <i>Bx8</i> | BT04.2197             | BT04    |                    |
| <i>E. crus-galli</i>   | AH  | <i>Bx8</i> | AH04.2214             | AH04    |                    |
| <i>E. crus-galli</i>   | BH  | <i>Bx8</i> | BH04.2294             | BH04    |                    |
| <i>E. crus-galli</i>   | CH  | <i>Bx8</i> | CH04.2616             | CH04    |                    |
| <i>E. colona</i>       | DL1 | <i>Bx8</i> | DL04.2267             | DL04    |                    |
| <i>E. colona</i>       | DL2 | <i>Bx8</i> | DL04.2168             | DL04    |                    |
| <i>E. colona</i>       | EL  | <i>Bx8</i> | EL04.1879             | EL04    |                    |
| <i>A. tauschii</i>     |     | <i>Bx6</i> | AET2Gv20088500        | 2D      | AET1Gv20212300     |
| <i>T. urartu</i>       |     | <i>Bx6</i> | TuG1812G0200000785.01 | Tu2     |                    |
| <i>T. dicoccoides</i>  | A   | <i>Bx6</i> |                       |         | TRIDC1AG012200     |
| <i>T. dicoccoides</i>  | B   | <i>Bx6</i> | TRIDC2BG006360        | 2B      | TRIDC1BG014960     |
| <i>T. aestivum</i>     | A   | <i>Bx6</i> | TraesCS2A01G051700    | chr2A   | TraesCS1A01G085800 |
| <i>T. aestivum</i>     | B   | <i>Bx6</i> | TraesCS2B01G066000    | chr2B   | TraesCS1B01G103700 |
| <i>T. aestivum</i>     | D   | <i>Bx6</i> |                       |         | TraesCS1D01G087300 |
| <i>S. cereale</i>      |     | <i>Bx6</i> | ScWN7R01G511600       | 7R      | ScWN1R01G109200    |
|                        |     |            | ScWN7R01G511000       |         |                    |
| <i>Z. mays</i>         |     | <i>Bx6</i> | Zm00008a014884        | chr04   | Zm00008a033413     |
| <i>D. oligosanthos</i> |     | <i>Bx6</i> |                       |         | OEL32741.1         |
| <i>E. haploclada</i>   |     | <i>Bx6</i> | eh_chr9.1288          | eh_chr9 | eh_chr6.2252       |
| <i>E. oryzipicola</i>  | AT  | <i>Bx6</i> | AT09.1105             | AT09    | AT06.700           |
| <i>E. oryzipicola</i>  | BT  | <i>Bx6</i> | BT09.1964             | BT09    | BT06.802           |
|                        |     |            |                       |         | BT06.803           |
| <i>E. crus-galli</i>   | AH  | <i>Bx6</i> | AH09.1073             | AH09    | AH06.747           |
| <i>E. crus-galli</i>   | BH  | <i>Bx6</i> |                       |         | BH06.788           |
|                        |     |            |                       |         | BH06.790           |
| <i>E. crus-galli</i>   | CH  | <i>Bx6</i> | CH09.1289             | CH09    | CH06.821           |
|                        |     |            |                       |         | CH06.823           |
| <i>E. colona</i>       | DL1 | <i>Bx6</i> |                       |         | DL06.2287          |
|                        |     |            |                       |         | DL06.2288          |
| <i>E. colona</i>       | DL2 | <i>Bx6</i> | DL09.1179             | DL09    | DL06.2287          |
|                        |     |            |                       |         | DL06.2288          |
| <i>E. colona</i>       | EL  | <i>Bx6</i> | EL09.1058             | EL09    | EL06.1910          |
|                        |     |            | EL09.1059             |         | EL06.1911          |
|                        |     |            |                       |         | EL06.1913          |
| <i>E. colona</i>       | FL  | <i>Bx6</i> | FL09.1015             | FL09    | FL06.479           |
|                        |     |            |                       |         | FL06.480           |
| <i>D. exilis</i>       | A   | <i>Bx6</i> | Dexi7A01G0007160      | 7A      | Dexi4A01G0007650   |
|                        |     |            |                       |         | Dexi4A01G0007670   |
| <i>D. exilis</i>       | B   | <i>Bx6</i> | Dexi7B01G0008100      | 7B      | Dexi4B01G0007960   |
|                        |     |            |                       |         | Dexi4B01G0007980   |
|                        |     |            |                       |         | Dexi4B01G0007990   |
| <i>S. italica</i>      |     | <i>Bx6</i> | Seita.7G107200        | 4       | Seita.4G083700     |
| <i>S. viridis</i>      |     | <i>Bx6</i> | Sevir.7G114500        | 4       | Sevir.4G082900     |

**Supplemental Table 3. Topology tests of two hypothesis on transfer of Bx genes in Triticeae from Panicoideae**

| Datasets          | Alignment with MAFFT |               |               | Alignment with MAFFT and Gblocks trimming |               |               |
|-------------------|----------------------|---------------|---------------|-------------------------------------------|---------------|---------------|
| Topologies tested | PO vs Non-PO         |               |               | PO vs Non-PO                              |               |               |
|                   | AU                   | RELL          | SH            | AU                                        | RELL          | SH            |
| <i>Bx1</i>        | 1.0000/4.98e-34      | 1.0000/0.0000 | 1.0000/0.0000 | 0.9999/5.41e-5                            | 1.0000/0.0000 | 1.0000/0.0000 |
| <i>Bx2</i>        | 1.0000/9.72e-9       | 1.0000/0.0000 | 1.0000/0.0000 | 0.9996/0.0004                             | 1.0000/0.0000 | 1.0000/0.0000 |
| <i>Bx3/4/5</i>    | 1.0000/1.43e-5       | 1.0000/0.0000 | 1.0000/0.0000 | 0.9981/0.0019                             | 1.0000/0.0000 | 1.0000/0.0000 |
| <i>Bx8</i>        | 1.0000/2.58e-44      | 1.0000/0.0000 | 1.0000/0.0000 | 1.0000/5.75e-5                            | 1.0000/0.0000 | 1.0000/0.0000 |
| <i>Bx6</i>        | 1.0000/1.18e-6       | 1.0000/0.0000 | 1.0000/0.0000 | 1.0000/4.4e-61                            | 1.0000/0.0000 | 1.0000/0.0000 |

PO, Panicoideae origin; non-PO, non-Panicoideae origin; AU, approximately unbiased test; REll, resampling estimated log-likelihood method; SH, Shimodaira-Hasegawa test.
