# Supplementary material for: Horizontal transfer and evolution of the biosynthetic gene cluster for benzoxazinoids in plants
Source: PubMed Central journal article supplement — Plant Commun. 2022 Mar 25;3(3):100320. doi: 10.1016/j.xplc.2022.100320 (PMC9251436; doi:10.1016/j.xplc.2022.100320), 2022-03-25
Supplement: mmc2.pdf [file mmc2.pdf]

# Horizontal transfer and evolution of the biosynthetic gene cluster for benzoxazinoids in plants

Dongya Wu<sup>1,2</sup>, Bowen Jiang<sup>2</sup>, Chu-Yu Ye<sup>2</sup>, Michael P. Timko<sup>3</sup> and Longjiang Fan<sup>1,2,\*</sup>

<sup>1</sup>Hainan Institute of Zhejiang University, Yonyou Industrial Park, Sanya 572025, China

<sup>2</sup>Institute of Crop Science & Institute of Bioinformatics, Zhejiang University, Hangzhou 310058, China

<sup>3</sup>Department of Biology, University of Virginia, Charlottesville, VA 22904, USA

\*Correspondence: Longjiang Fan (fanlj@zju.edu.cn)

<https://doi.org/10.1016/j.xplc.2022.100320>

## ABSTRACT

**Benzoxazinoids are a class of protective and allelopathic plant secondary metabolites that have been identified in multiple grass species and are encoded by the Bx biosynthetic gene cluster (BGC) in maize. Data mining of 41 high-quality grass genomes identified complete Bx clusters (containing genes *Bx1–Bx5* and *Bx8*) in three genera (*Zea*, *Echinochloa*, and *Dichanthelium*) of Panicoideae and partial clusters in Triticeae. The Bx cluster probably originated from gene duplication and chromosomal translocation of native homologs of Bx genes. An ancient Bx cluster that included additional Bx genes (e.g., *Bx6*) is presumed to have been present in ancestral Panicoideae. The ancient Bx cluster was putatively gained by the Triticeae ancestor via horizontal transfer (HT) from the ancestral Panicoideae and later separated into multiple segments on different chromosomes. *Bx6* appears to have been under less constrained selection compared with the Bx cluster during the evolution of Panicoideae, as evidenced by the fact that it was translocated away from the Bx cluster in *Zea mays*, moved to other chromosomes in *Echinochloa*, and even lost in *Dichanthelium*. Further investigations indicate that purifying selection and polyploidization have shaped the evolutionary trajectory of Bx clusters in the grass family. This study provides the first candidate case of HT of a BGC between plants and sheds new light on the evolution of BGCs.**

**Keywords:** biosynthetic gene cluster, horizontal transfer, benzoxazinoid, grass, purifying selection

**Wu D., Jiang B., Ye C.-Y., Timko M.P., and Fan L. (2022).** Horizontal transfer and evolution of the biosynthetic gene cluster for benzoxazinoids in plants. *Plant Comm.* **3**, 100320.

## INTRODUCTION

Biosynthetic gene clusters (BGCs) are specialized genomic organizations composed of a cluster of non-homologous genes that contribute to the biosynthesis of chemical defensive metabolites (Nützmann and Osbourn, 2014; Nützmann et al., 2018). The selective advantages of clustering, such as gene co-regulation and co-inheritance, may promote the formation of BGCs (Nützmann and Osbourn, 2014; Nützmann et al., 2016; Rokas et al., 2018). Natural selection, including long-term purifying selection, positive selection, and balancing selection, has also driven the establishment and maintenance of BGCs (Carbone et al., 2007; Takos and Rook, 2012; Rokas et al., 2018; Liu et al., 2020). The formation and evolution of BGCs have been studied extensively in fungi (Rokas et al., 2018). Approximately 30 examples of BGCs in plants have been identified in recent years (Boycheva et al., 2014; Guo et al., 2018). The Bx cluster for the biosynthesis of benzoxazinoids was the first BGC identified in plants (Frey et al., 1997).

Gene duplication, neofunctionalization, and relocation have been suggested as the origins of BGCs in most fungi and plants (Nützmann et al., 2018; Rokas et al., 2018). The DAL gene cluster involved in allantoin metabolism originated from duplication of native genes and relocation in the yeast *Saccharomyces cerevisiae* (Wong and Wolfe, 2005). The GAL cluster in *Candida* yeasts originated from the relocation of native unclustered genes (Slot and Rokas, 2010). Horizontal transfer (HT) also leads to the emergence and spread of BGCs and is an important source of genomic innovation (Khaldi et al., 2008; Slot and Rokas, 2011; Reynolds et al., 2018; Kominek et al., 2019; Tralamazza et al., 2019; Li et al., 2020). In the fungus *Aspergillus clavatus*, the ACE1 gene cluster originated by HT from a donor closely related to the rice blast fungus *Magnaporthe grisea*

Published by the Plant Communications Shanghai Editorial Office in association with Cell Press, an imprint of Elsevier Inc., on behalf of CSPB and CEMPS, CAS.

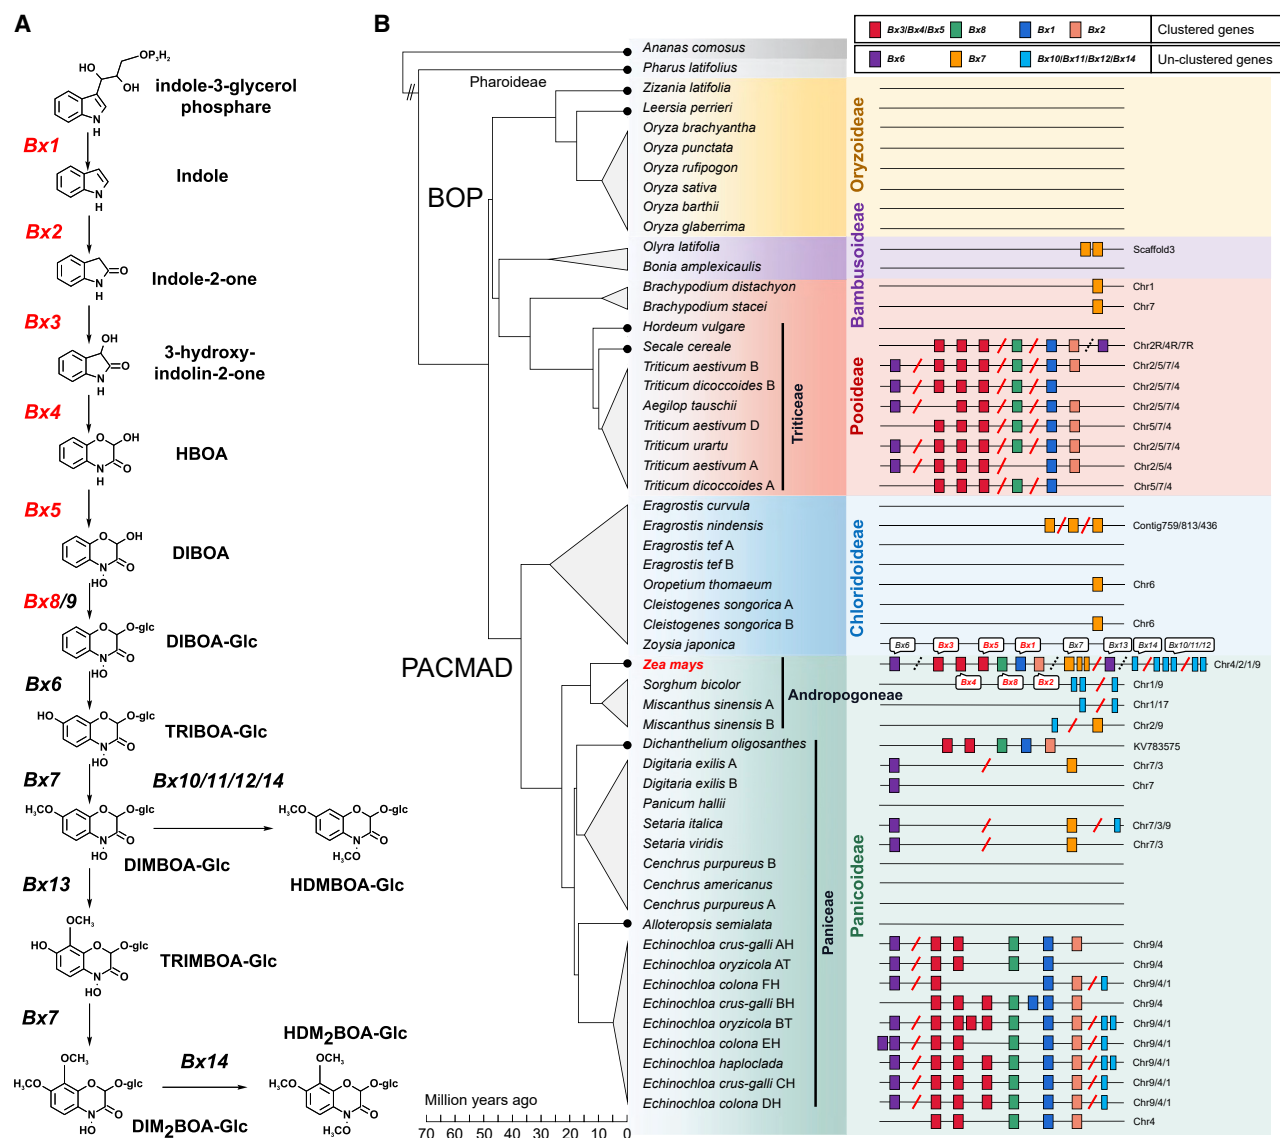

**Figure 1. Benzoxazinoid biosynthesis pathway and distribution of Bx genes in grasses**

**(A)** Biosynthetic pathway of benzoxazinoid secondary metabolites in maize. The pathway (Bx)-related genes in the Bx cluster are marked in red.

**(B)** Phylogeny and Bx gene distribution of grass species. Background colors represent different subfamilies in Poaceae. The lineage divergence time is adopted from the TimeTree database ([www.timetree.org](http://www.timetree.org)). Each rectangle represents one gene element. Genes flanking the red slash are located on two different chromosomes, and genes flanking the black dashed slash are on the same chromosome but not clustered.

(Khaldi et al., 2008). The GAL cluster of *Schizosaccharomyces* yeasts was acquired from a *Candida* yeast (Slot and Rokas, 2010). A full operon encoding siderophore biosynthesis genes was horizontally transferred from bacteria to a group of budding yeasts (Kominek et al., 2019). In animals, bdelloid rotifers, small freshwater invertebrates, appear to have acquired a BGC for cell wall peptidoglycan biosynthesis composed of a racemase and a ligase from bacteria (Gladyshev et al., 2008). In plants, BGCs are unlikely to have been derived from microbes via HT (Nützmann et al., 2018), and no BGCs acquired by HT have been identified.

Benzoxazinoids are a class of indole-derived protective and allelopathic secondary metabolites that function in plant defense against insect herbivores, microbial pathogens, and neighboring

competing plants (reviewed in Frey et al., 2009). 2,4-Dihydroxy-1,4-benzoxazin-3-one (DIBOA) and its 7-methoxy analog DIMBOA are the predominant representatives of benzoxazinoids in plants (Frey et al., 1997, 2009), and these compounds have been identified in many plants, including maize (*Zea mays*), wheat (*Triticum aestivum*), and barnyardgrass (*Echinochloa crus-galli*) (Frey et al., 2009; Guo et al., 2017). In the weed species *Echinochloa*, DIBOA functions as an allelopathic compound against rice in paddy fields (Guo et al., 2017).

The pathway of benzoxazinoid biosynthesis has been elucidated extensively in *Z. mays* (Figure 1A). The first step is the biosynthesis of indole from indole-3-glycerol phosphate in the chloroplast by Bx1, a homolog of the  $\alpha$ -subunit of tryptophan synthase. Four P450 monooxygenases from the CYP71C subfamily (Bx2–



## Plant Communications

Bx5) add four oxygen atoms at the four positions of the indole to synthesize DIBOA, the simplest benzoxazinoid (Frey et al., 1997). Two uridine diphosphate (UDP)-glucosyltransferases (UGTs), Bx8 and Bx9, attach a glucose moiety to DIBOA to produce DIBOA-Glc (Von Rad et al., 2002). Bx6, a 2-oxoglutarate-dependent dioxygenase (2-ODD), oxidizes DIBOA-Glc to TRIBOA-Glc, and Bx7 (O-methyltransferase [OMT]) subsequently methylates TRIBOA-Glc to produce DIMBOA-Glc (Jonczyk et al., 2008). Four functionally redundant OMTs (Bx10–Bx12 and Bx14) catalyze the conversion of DIMBOA-Glc to HDMBOA-Glc (Meihls et al., 2013). Bx13, a Bx6-like 2-ODD, converts DIMBOA-Glc to TRIMBOA-Glc, and TRIMBOA-Glc is further methylated by Bx7 to produce DIM2BOA-Glc (Handrick et al., 2016). Bx14 catalyzes the reaction from DIM2BOA-Glc to HDIM2BOA-Glc by methylation (Handrick et al., 2016).

In maize, six Bx genes (Bx1–Bx5 and Bx8) that encode enzymes for the first few steps of DIMBOA biosynthesis form a well-defined BGC (the Bx cluster) at the tip region of chromosome 4 (Frey et al., 1997, 2009). Bx genes have been identified in an intact cluster in barnyardgrass and in dispersed subclusters in wheat and rye (Sue et al., 2011; Guo et al., 2017). Previous studies have supported a monophyletic origin of Bx genes for benzoxazinoid biosynthesis (Frey et al., 2009; Sue et al., 2011; Dutarte et al., 2012; Nützmann and Osbourn, 2014). The progenitors evolved Bx genes before the divergence of the Triticeae and the Panicoideae (Sue et al., 2011; Dutarte et al., 2012). However, it should be noted that limited sampling may lead to overinterpretation of gene phylogeny. Frequent gene loss and rearrangements and patchy distribution across divergent species have complicated our understanding of BGC evolution (Lind et al., 2017). The broad availability of high-quality genomes of important crops and wild grasses has facilitated the discovery of more BGCs (Guo et al., 2018), enabling us to trace the organization and evolution of BGCs more comprehensively and reliably.

Here, we identified homologs of Bx genes in the grass family using 41 high-quality monocot genomes, explored the origin of the Bx cluster, and reconstructed its evolutionary trajectory. Through the analysis of sequence similarities, phylogeny, and genomic synteny, we provide evidence that the Bx clusters currently observed in grasses have originated from a complex evolutionary process that includes HT. The HT event and further natural selection have shaped the presence of Bx clusters in the grass family.

## RESULTS

### Identification and distribution of Bx genes in the grass family

Key genes in the benzoxazinoid biosynthesis pathway of *Z. mays*, including those in the Bx cluster (Bx1–Bx5 and Bx8) and Bx genes

## Horizontal Transfer of a Plant Biosynthetic Gene Cluster

dispersed in the genome (Bx6, Bx7, and Bx9–Bx14) were used as bait to search for Bx genes and homologs in the genomes of 41 monocot species covering five subfamilies of core grasses (Bamusoideae, Oryzoideae, and Pooideae [BOP] from the BOP lineage, and Chloridoideae and Panicoideae from the Panicoideae, Arundinoideae, Chloridoideae, Micrairoideae, Aristidoideae, and Danthonioideae [PACMAD] lineage) and the basal group of Poaceae (*Pharus latifolius*) (Figure 1B; Supplemental Table 1; Saarela et al., 2018). Homologs of Bx genes were identified in grass genomes based on their sequence similarities, phylogeny, and genomic physical positions (Figure 1B; Supplemental Table 2).

In addition to the Bx clusters previously reported in *Z. mays* and *Echinochloa* (Frey et al., 1997; Guo et al., 2017), a Bx cluster was also found in *Dichanthelium oligosanthes*, Scribner's rosette grass, a C3 panicoid grass (Figure 1B). In Triticeae, the Bx cluster is split into three subclusters located on three different chromosomes. In total, 12 clusters were found in 6 grass species, 10 of which are in the *Echinochloa* genus, with 1 cluster in each monoploid genome (except 1 subgenome in *Echinochloa colona* with 2 copies) (Wu et al., 2022). The Bx gene orders in the clusters are entirely consistent among *Z. mays*, *D. oligosanthes*, and *Echinochloa*, implying a single origin of the Bx clusters (Figure 1B). Although the Bx cluster is split in Triticeae, the order of Bx3–Bx5 is the same as the Bx cluster in Panicoideae, showing the potentially close relationship between Bx genes in the BOP and PACMAD lineages. Bx6 is a distant 1.31 Mb away from the Bx cluster in the *Z. mays* genome, although both the gene and the cluster are located on chromosome 4. Bx6 genes are located on chromosome 9 in *Echinochloa*, rather than on chromosome 4 where the Bx clusters are located. Bx6 was also identified in *Digitaria* and *Setaria* from Panicoideae. In Triticeae, Bx6 genes are located on chromosome 2 in *Triticum* and *Aegilops* but on chromosome 7R in rye (*Secale cereale*), where Bx1 and Bx2 in rye are also located (Figure 1B; Supplemental Table 2). Bx7 genes are found in both BOP and PACMAD lineages, in spite of massive loss.

### Formation and HT of the Bx cluster (Bx1–Bx5 and Bx8)

The phylogeny of Bx1 homologs across the grass family was constructed, and the phylogenetic tree is clearly separated into three clades: Igl1 (indole-3-glycerol phosphate lyase 1), TSA1 (tryptophan synthase  $\alpha$  subunit 1), and TSAh1 (tryptophan synthase A homolog 1) (Figure 2A and Supplemental Figure 1). Igl1, TSA1, and TSAh1 are paralogs of Bx1 in maize. In the phylogeny, the Bx1 clade is nested within the TSAh1 clade, implying that Bx1 genes originated from the duplication of TSAh1.

With *P. latifolius* from Pharoideae (N1 PI03g34340 in Figure 2A) serving as an outgroup, the TSAh1 clade is divided into the

abbreviation and gene ID. Background fill colors represent subfamilies. The Bx1 clade is highlighted as Bx-copy (e.g., B1–B4), and the native homologs of Bx1 (TSAh1 genes) are labeled as native-copy (e.g., N0–N7). The left bottom tree shows the phylogenetic relationships of five subfamilies.

(B) Genomic synteny of native Bx1 homologs (TSAh1 genes) among species. Red dots representing the native Bx1 homologs (TSAh1 genes) are syntenic.

(C) Local protein sequence alignments of Bx1 genes and their native homologs (TSAh1 genes). Bx-copy specific deletion and amino acid substitution are marked in gray rectangles.

(D) Genomic synteny between *Z. mays* and other species around the position of Bx1. For each species, the synteny around Bx1 is magnified locally in the right panel.

(E) Phylogenetic tree of Bx homologs using nucleotide sequences from the third codon position. Bootstrap values less than 95 are indicated on branches.



BOP and PACMAD lineages, in line with the species tree (Figure 2A). *Bx1* genes form a monoclade, composed of *Bx1* copies from previously identified species with Bx clusters. To distinguish other *Bx1* homologs from *Bx1* copies in the monoclade, we referred to the other *Bx1* homologs in the subtree as *TSA1h* homologs. The *TSA1h* homologs are native and extraordinarily conserved across the grass family, and they show good synteny among the genomes (Figure 2B). The *TSA1h* homolog AET5Gv21022100 (N0 in Figure 2A) in *Aegilops tauschii* from Pooideae is syntenic to the *TSA1h* homolog PI3g34340 (N1) in *P. latifolius* from the basal lineage of Poaceae, as well as the *TSA1h* homologs LOC\_Os3g58300 (N2) in *Oryza sativa* from Oryzoideae, Et\_4A\_034058 (N5) in *Eragrostis tef* from Chloridoideae, Sevir.9G054600 (N6) in *Setaria viridis* from Paniceae, Panicoideae, and Zm00008a005484 (N8) in *Z. mays* from Andropogoneae, Panicoideae. Sequence alignments show that they are conserved with the tryptophan synthase domain (Figure 2C and Supplemental Figure 2). In contrast to the native *TSA1h* homologs, the clade of *Bx1* copies, which is nested between native *TSA1h* homologs of Chloridoideae and Panicoideae and is sister to native homologs of Panicoideae, is an extra lineage-specific copy duplicated in the ancestor of Panicoideae (Figure 2A). Therefore, based on the position of the *Bx1* clade in the phylogeny and the conserved evolution of *TSA1h* homologs across the whole family, the hypothesis that *Bx1* originated before the divergence between Panicoideae and Triticeae should be rejected. To confirm the lineage-specific duplication event, local synteny of *Bx1* was scanned between *Z. mays* and other genomes (Figure 2D). The two flanking genomic regions of the Bx cluster in *Z. mays* show high synteny to *Brachypodium distachyon* and *A. tauschii* from Pooideae, *O. sativa* from Oryzoideae, *Sorghum bicolor* from Andropogoneae, Panicoideae, and *Setaria viridis* from Paniceae, Panicoideae. However, the Bx cluster is entirely absent in these genomes. Comparing the gene positions of Bx clusters between *Z. mays* and *Echinochloa haploclada* from *Echinochloa*, their Bx clusters are in a large syntenic block, and the order of the Bx genes is consistent, implying a common origin of the Bx cluster in their common ancestor before the divergence of Andropogoneae and Paniceae, although there is a translocation between them. Although the scaffold that harbors the Bx cluster in *D. oligoanthes* is short, the sequences of five Bx genes were successfully assembled, and their orders are consistent with those in *Z. mays*, further supporting the origin of the Bx cluster in ancestral Panicoideae. Sequence alignment of *Bx1* genes and their native homologs shows *Bx1* lineage-specific deletion and substitution, confirming a single origin of *Bx1* genes (Figure 2C).

Within the *Bx1* clade, *Bx1* genes from the Triticeae form a monoclade nested among *Bx1* genes from Panicoideae, indicating a single origin of these genes in Triticeae. Because the divergence between the Pooideae and Panicoideae is ancient, estimated at more than 50 mya (Ma et al., 2021), and native *TSA1h* homologs are present, the positional congruence of the Triticeae *Bx1* clade is unlikely to be derived from sexual hybridization, incomplete lineage sorting (ILS), or convergent evolution, but rather from HT from the Panicoideae (Figure 2A). To further confirm the robustness of the *Bx1* phylogeny based on protein sequences, phylogenetic trees of *Bx1* were constructed from coding sequence (CDS), codon12 (first and

second codon positions), and codon3 (third codon position, whose evolution can serve as a proxy for synonymous substitution), and their topologies confirmed the gene duplication and HT of *Bx1* (Figure 2E and Supplemental Figure 3).

We built a phylogeny and scanned the genomic synteny of *Bx2*–*Bx5* and *Bx8* across the whole Poaceae (Supplemental Figures 4 and 5). Native homologs of *Bx2* could be traced and are highly conserved (Supplemental Figure 4). *Bx3*, *Bx4*, and *Bx5* are three tandem duplicated CYP71C genes from the cytochrome P450 superfamily. The native ancestral homologs of *Bx3*–*Bx5* are massively lost, but the retained homologs show high genomic synteny among subfamilies (Supplemental Figure 4). Based on the *Bx8* phylogeny, *Bx8* genes are the duplicated products of native homologs, and *Bx8* genes in the Triticeae are nested within those of Panicoideae. *Bx9* is a maize-specific duplicate of *Bx8* (Supplemental Figure 5). In brief, the topologies of the five Bx genes (*Bx2*–*Bx5* and *Bx8*) are similar to those observed in the *Bx1* phylogeny, implying that Bx genes in the cluster may be derived from a single origin and that Bx genes in Triticeae have probably been acquired via HT of an intact Bx cluster from Panicoideae.

To formally test the hypothesis of a Panicoideae origin of the Bx genes in Triticeae, we reconstructed phylogenies under constraints that the Bx genes in Triticeae had a Panicoideae Bx clade origin (PO) or originated outside of that clade (Non-PO). To determine whether the PO phylogenies were statistically better explanations than the non-PO phylogenies, we used the approximately unbiased (AU) test, the resampling estimated log-likelihood method (RELL), and the Shimodaira-Hasegawa (SH) test. All tests of all Bx genes in the cluster (*Bx1*–*Bx5* and *Bx8*) strongly rejected the alternative hypothesis that Bx genes in Triticeae are not derived from Panicoideae (all  $p < 0.001$  for AU tests) (Supplemental Table 3). These results indicate that the obtained tree topologies of all Bx genes are highly robust and reflect HT of the Bx genes from Panicoideae to Triticeae.

### Evolution of *Bx6* and other Bx genes

The *Bx6* gene whose encoded product is responsible for oxidizing DIBOA-Glc to TRIBOA-Glc, the subsequent enzymatic step that follows the activity of the Bx cluster genes in maize, is located away from the Bx cluster (Figure 1A). The phylogeny of *Bx6* shows a pattern similar to that of *Bx1*, in that the Bx clade is duplicated from native *Bx6* homologs and HT from Panicoideae is probably responsible for the inheritance of the *Bx6* genes in Triticeae (Figure 3A). Multi-species genome synteny analyses support the above results (Figure 3B). Topology tests confirm the robustness of the *Bx6* phylogeny, and *Bx6* genes in Triticeae are nested within the Panicoideae *Bx6* clade ( $p < 0.001$  for AU test) (Supplemental Table 3). Notably, in addition to species harboring the Bx cluster, *Setaria* and *Digitaria* from Panicoideae also contained *Bx6* genes (Figures 1B and 3A). We also observed that *Bx13* is a maize-specific duplicate of *Bx6* (Figure 3A).

We identified the presence of other dispersed Bx genes and built phylogenetic trees to trace their evolutionary histories. *Bx7* catalyzes the conversion of TRIBOA-Glc to DIMBOA-Glc (Figure 1A). Only limited homologs could be identified in grasses, and their phylogenetic tree reveals that *Bx7* has been conserved in

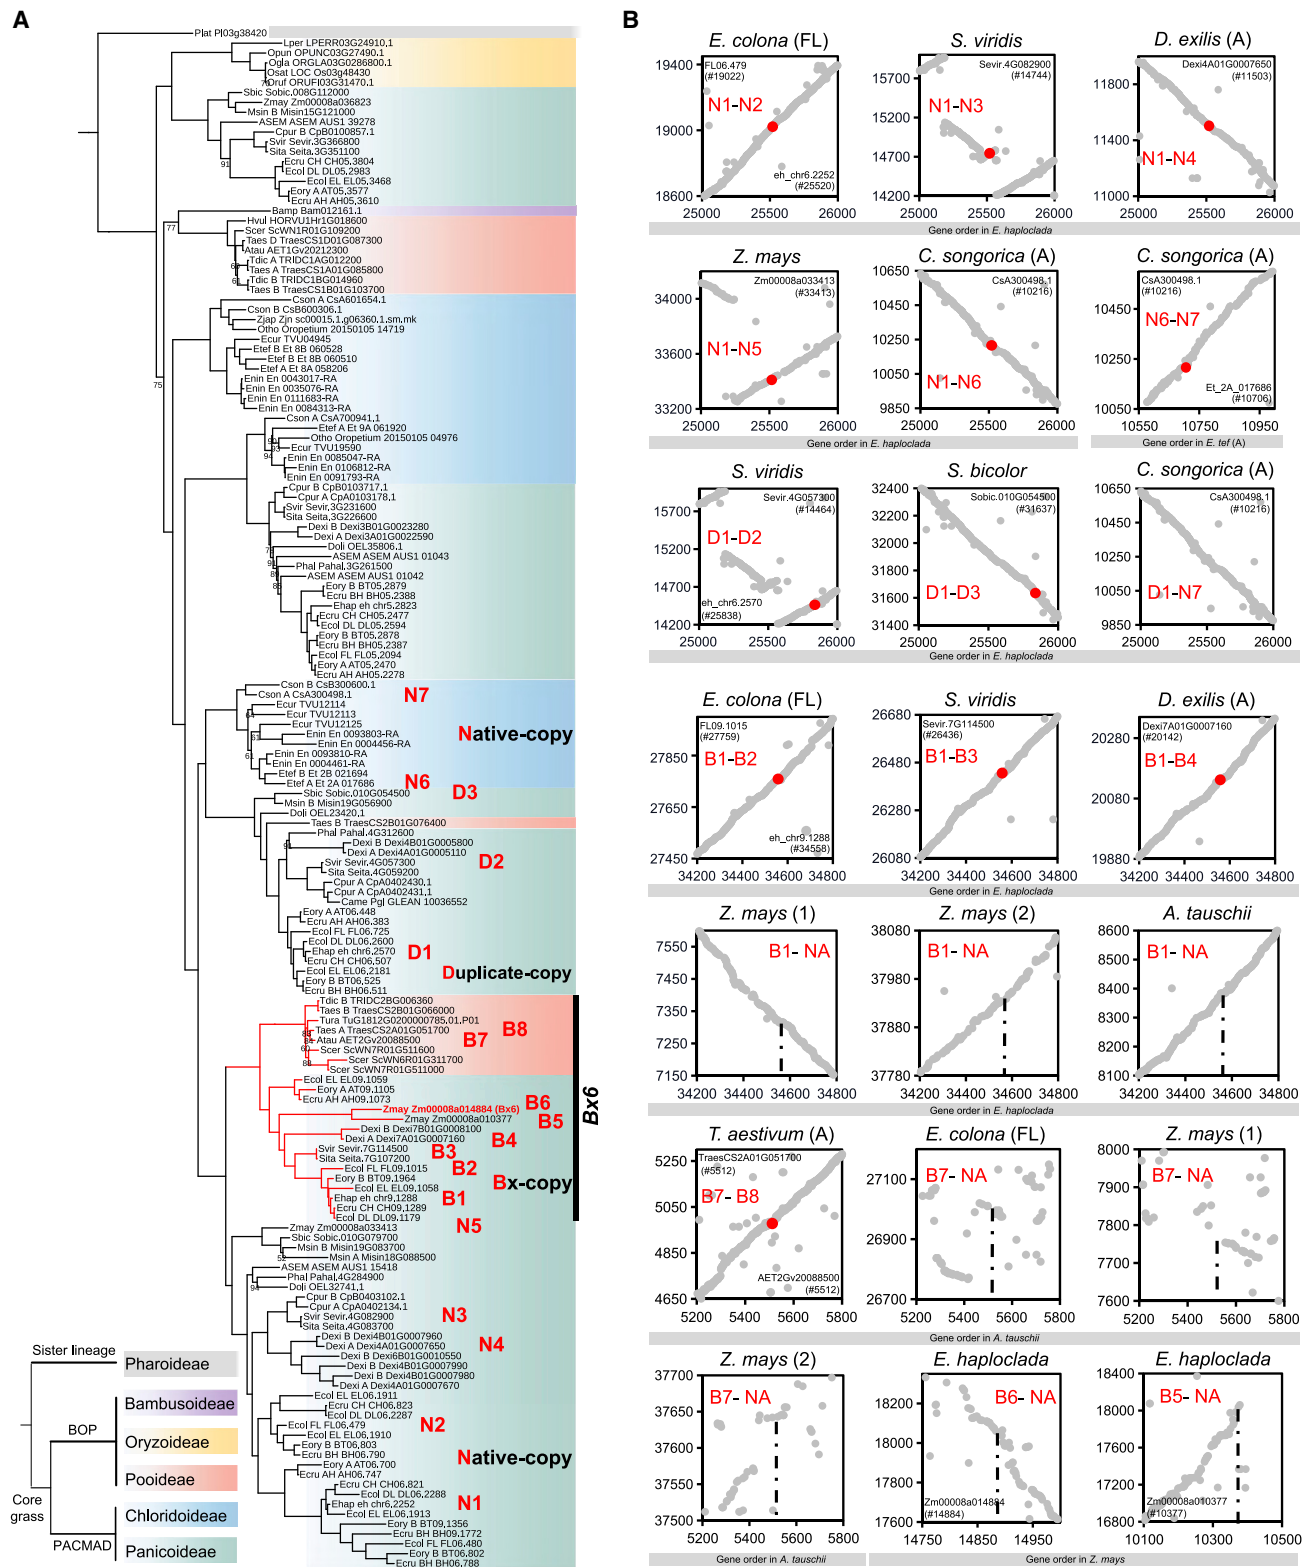

**Figure 3. Phylogeny and genomic synteny of *Bx6* in grasses.**

**(A)** A maximum-likelihood phylogenetic tree of *Bx6* using protein sequences from grasses. Bootstrap values less than 95 are labeled at branches. Background fill colors represent subfamilies. The *Bx6* clade is highlighted as Bx-copy (e.g., B1–B8) and the native homologs of *Bx6* are labeled as native-copy (e.g., N1–N7). The other duplicates of *Bx6* native homologs are labeled as duplicate-copy (e.g., D1–D3). The left bottom tree shows the phylogenetic relationships of five subfamilies.

**(B)** Genomic synteny among *Bx6* genes and their homologs between species based on gene order in each genome. Red dots representing the *Bx6* genes or homologs are syntenic.

evolution; the tree is consistent with the species phylogeny, although massive losses have occurred (Supplemental Figure 6). *Bx10/Bx11/Bx12/Bx14* encode OMTs that act as metabolic switches between caterpillar and aphid resistance by transforming DIMBOA-Glc to HDMBOA-Glc (Li et al., 2018). From the phylogenetic analyses, the clade *Bx10/Bx11/Bx12/Bx14* contains maize-specific duplicates and is nested in a well-defined Panicoideae-specific clade (Supplemental Figure 7). No Triticeae homologs are found within this clade. In wheat (*T. aestivum*), two OMT genes are characterized as functional DIMBOA-Glc OMTs; both are designated as *TaBx10* but are phylogenetically close to *Bx7* rather than *Bx10* in *Z. mays*, indicating the functional convergence of OMT genes in grasses during the process of O-methylation (Li et al., 2018). This case implies that other paralogs of OMTs could function as *Bx10/Bx11/Bx12/Bx14* in the process of O-methylation and that *Bx10/Bx11/Bx12/Bx14* are not required for benzoxazinoid biosynthesis. Taken together, this evidence suggests that *Bx7* and *Bx10/Bx11/Bx12/Bx14* are alternative and to some extent dispensable in the Bx pathway. Hence, in the following analyses, we focused on the Bx cluster and *Bx6*.

### Constrained purifying selection on the Bx cluster

Natural selection shapes the evolutionary dynamics of BGCs (Slot and Rokas, 2010; Rokas et al., 2018; Liu et al., 2020). Selection pressure was measured by  $\omega$  (dN/dS, the ratio between non-synonymous site substitution and synonymous site substitution) in each lineage of the individual Bx genes. In general, both the Bx genes and their native homologs are under purifying selection ( $\omega < 1$ ). Compared with the outgroup lineage N-Chloridoideae (native Bx homologs in Chloridoideae), constrained purifying selection was detected in all of the native Bx genes of Panicoideae, with the exception of *Bx6*. The native homologs of *Bx6* in Panicoideae undergo relaxed selection with a higher  $\omega$  value relative to other Bx native genes. Compared with the native homologs,  $\omega$  values are lower for Bx genes in the cluster in Panicoideae (B-Panicoideae), whereas no difference in selection was found for *Bx6*, which is separate from the Bx cluster. This selection bias in Panicoideae corresponds to the presence and absence (PAV) of Bx genes and their homologs (Supplemental Figure 8). The loss of native homologs of Bx genes in the cluster is more frequent than the loss of Bx genes in the cluster, which mirrors the relaxed selection, especially for *Bx2*, *Bx5*, and *Bx8*. The presence of *Bx6* native homologs is highly conserved, with one copy within one analyzed genome, corresponding to unbiased selection pressure compared with *Bx6* genes (Supplemental Figure 8). In Triticeae, all of the Bx genes exhibit constrained selection, despite the conserved presence of Bx native homologs (Figures 4A and Supplemental Figure 8). Although Bx genes in Triticeae are inferred to have been gained from Panicoideae, stronger selection was detected in Triticeae Bx genes than in those of Panicoideae, especially for *Bx1* and *Bx6*. To eliminate the effects of biases from species sampling and PAV of Bx genes or native homologs, selection pressure was measured focusing on *Echinochloa* and Triticeae. The results further confirmed the selection profiling of Bx genes (Supplemental Figure 9).

### Dominance of Bx cluster genes in polyploids

Polyploids are commonly seen in species whose genomes contain Bx genes (hexaploid *T. aestivum*, *E. crus-galli*, and

*E. colona* and tetraploid *Triticum dicoccoides* and *Echinochloa oryzicola* in this study). We investigated the effects of polyploidization on Bx clusters or genes from three different viewpoints: PAV, selection, and gene expression. Duplicated genes tend to be lost in polyploids owing to gene redundancy or dosage effects (Soltis and Soltis, 2009; Van de Peer et al., 2017). Not unexpectedly, Bx genes tend to be lost in polyploids, especially in *Echinochloa* (Figures 1B and Supplemental Figure 8). The core Bx gene set is intact in diploid *Echinochloa haploclada*, whereas Bx losses are found in three polyploid *Echinochloa* species. In this case, only one intact copy of the core Bx gene set is retained in one subgenome of each species (e.g., BT in *E. oryzicola*, CH in *E. crus-galli*, DH2 in *E. colona*).

The selection strength on homologous duplicates usually varies in polyploids (Ye et al., 2020). The genomes of *E. crus-galli* and its progenitors (*E. oryzicola* and *E. haploclada*) provide a model in which to study the selection dominance of multi-copy homologous Bx genes, and we calculated the  $\omega$  values of Bx genes in each subgenome between *E. crus-galli* and its parents (Figure 4B). Bx genes in subgenome A are generally under relaxed purifying selection, with higher  $\omega$  values compared with those in subgenomes B and C (e.g., *Bx1*, *Bx8*). For native homologs, selection on the subgenome A copy is relaxed in the example of *Bx6*. In general, biased selection is observed for Bx genes in *Echinochloa*, and Bx genes in subgenome A are under less constrained selection post-hexaploidization.

Expression dominance has been commonly observed in polyploids (Van de Peer et al., 2017; Ye et al., 2020). The response contribution (relative change in expressed transcripts from one subgenome compared with the total expression change) is also biased among subgenomes (Ye et al., 2020). To explore the effect of polyploidization on the gene expression of multi-copy Bx genes, we investigated the expression levels of Bx genes in *E. crus-galli* under allelopathy treatment (i.e., co-culture with rice) (Guo et al., 2017). Expression and response contribution were both suppressed for Bx genes in subgenome AH (Figure 4C). The dominance of selection and gene expression or response are associated, such that Bx genes in subgenome A under less constrained selection show suppression of expression and response contribution (Supplemental Figure 9).

## DISCUSSION

### Evolutionary trajectory of the Bx cluster in grass

Given that the Bx cluster and *Bx6* catalyze the first seven steps in benzoxazinoid biosynthesis and are sufficient for the synthesis of benzoxazinoid compounds without other Bx genes (e.g., in wheat), we consider the Bx cluster (*Bx1–Bx5* and *Bx8*) and *Bx6* to be the core set of Bx genes in the pathway (Figure 1A). Based on the results from all phylogenetic analyses of the core Bx genes, the evolutionary trajectory of the Bx genes can be inferred. Native Bx homologs are found in all phylogenetic trees of core Bx genes; they are evolutionarily conserved and show good genomic synteny among subfamilies. Therefore, the Bx genes in the Bx cluster and *Bx6* appear to originate from duplication of native Bx homologs. Previous studies proposed that *Bx1* evolved from duplication and modification of the alpha subunit of tryptophan synthase (TSA) (Grün et al., 2005; Frey

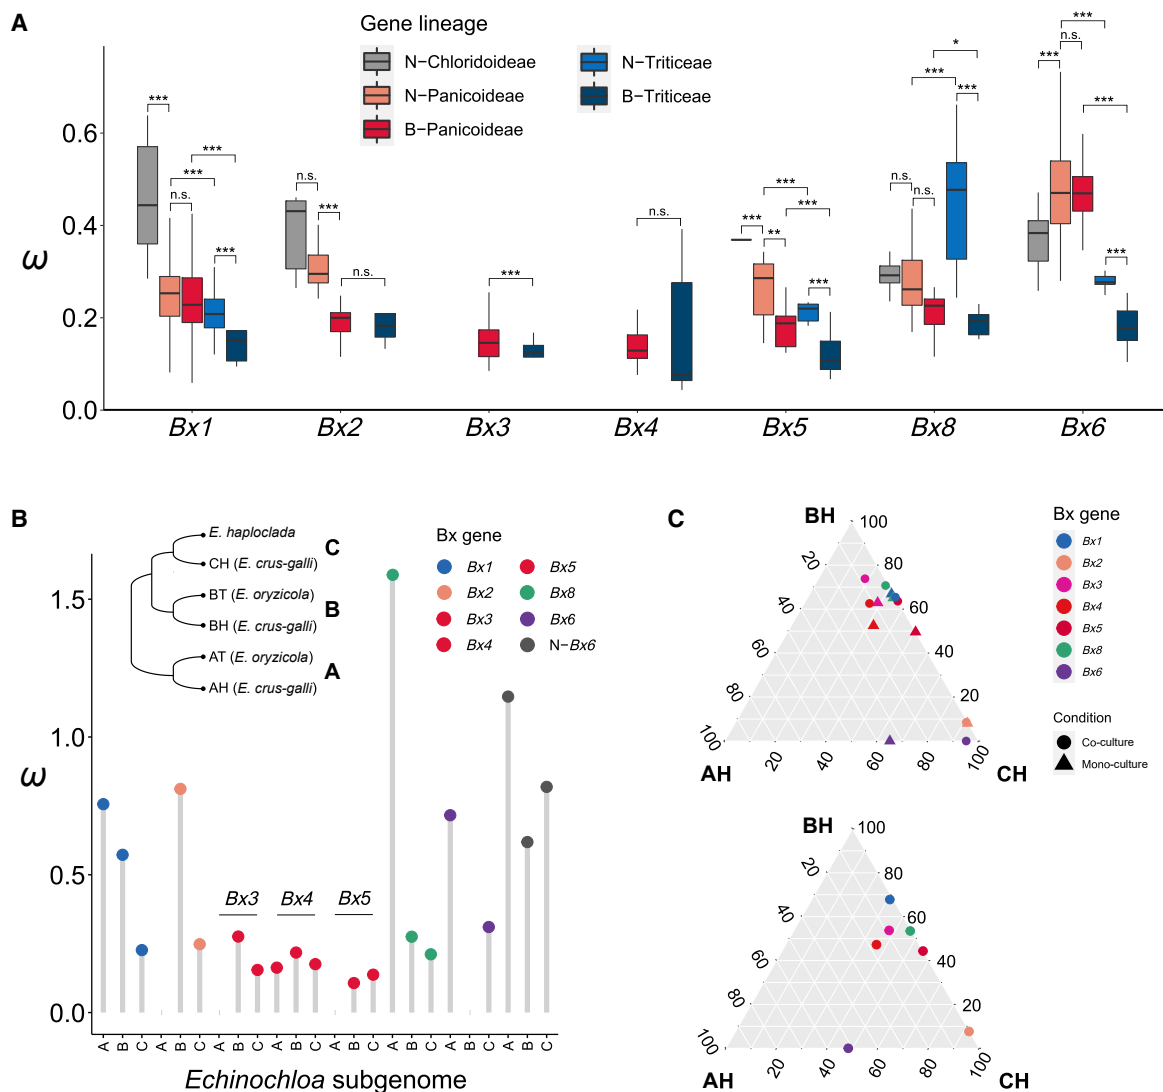

**Figure 4. Selection and polyploidization effects on the Bx genes.**

**(A)** Selection pressure estimated by  $\omega$  of Bx genes and native homologs. N-Chloridoideae, native homologs of Bx genes in Chloridoideae; N-Panicoideae, native homologs of Bx genes in Panicoideae; B-Panicoideae, Bx genes in Panicoideae; N-Triticeae, native homologs of Bx genes in Triticeae; and B-Triticeae, Bx genes in Triticeae. In the boxplots, the horizontal line shows the median value, and the whiskers show the 25% and 75% quartile values of  $\omega$ . Pairwise *t* tests were performed to evaluate significance. n.s., not significant; \**p* < 0.05; \*\**p* < 0.01; \*\*\**p* < 0.0001.

**(B)** Pairwise  $\omega$  of Bx genes and native homologs of Bx6 (N-Bx6) in subgenomes A, B, and C between *E. crus-galli* and its progenitors (*E. haploclada* and *E. oryzicola*). The topology shows the phylogenetic relationships among subgenomes in the three *Echinochloa* species, where AT and AH belong to subgenome A, BT and BH belong to subgenome B, and *E. haploclada* and CH belong to subgenome C.

**(C)** Relative expression (upper ternary diagram) and relative response contribution (lower ternary diagram) of multi-copy homologous Bx genes in *E. crus-galli* subgenomes (AH, BH, and CH) under the control and allelopathy treatments.

et al., 2009). Here, we comprehensively identified the native homologs of the Bx1 genes and found that *TSAh1* was the ancestor of Bx1 genes (Figure 2A). Gene duplication, followed by neofunctionalization and/or subfunctionalization, and recurrent genomic translocation may have gathered Bx genes together to form the Bx cluster. The processes of gene duplication and translocation may be induced by the activities of retrotransposon elements.

Previous studies proposed that the Bx genes in grasses were of monophyletic origin before the divergence of the Triticeae and Panicoideae (Frey et al., 2009; Grün et al., 2005). Here, our

integrated evidence strongly indicates that the Bx genes in Triticeae originated from Panicoideae via HT. Triticeae and Panicoideae diverged more than 50 mya, ruling out the possibility of natural hybridization between them and ILS. Previous studies found no benzoxazinoid biosynthesis in *Brachypodium* (basal genus in Pooideae) (Frey et al., 2009), consistent with the absence of identifiable Bx genes in two *Brachypodium* genomes (Figure 1B). Benzoxazinoids were produced in wild but not cultivated *Hordeum* (*H. vulgare* in Triticeae), indicating that Bx genes may have been lost in cultivated *Hordeum* (Grün et al., 2005; Sue et al., 2011). Therefore, we speculate that the transfers occurred in the



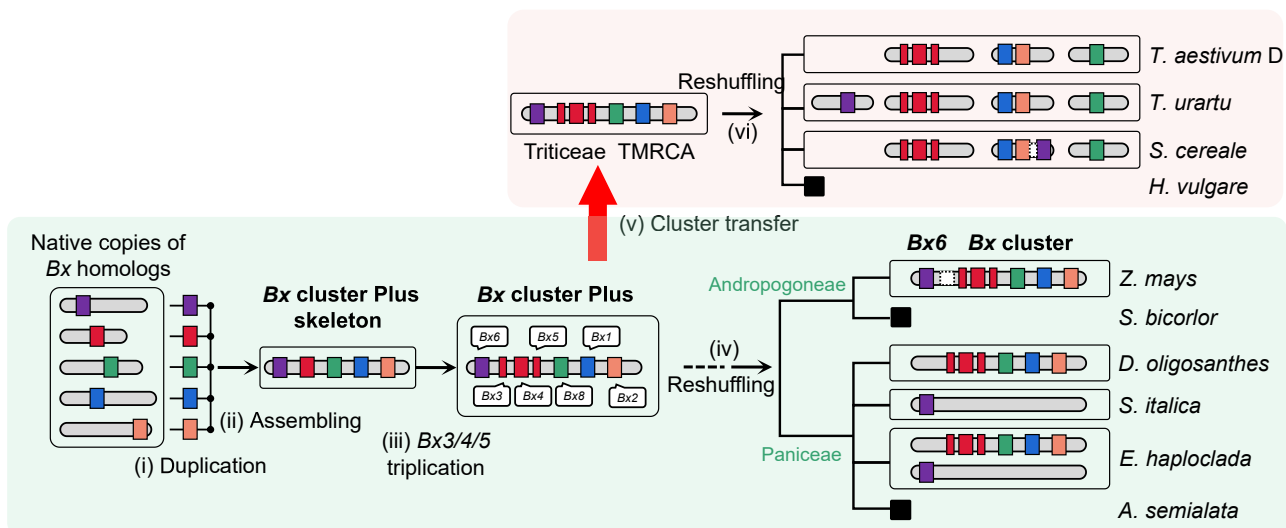

**Figure 5.** A hypothetical scenario for the origin and evolution of the Bx cluster in grasses. TMRCA, the most recent common ancestor.

common ancestor of Triticeae after the divergence with *Brachypodium*. To trace the potential donor of the Bx genes, we considered the topologies of Bx genes from Triticeae, Andropogoneae (e.g., *Z. mays*) and Paniceae (e.g., *Echinochloa*, *D. oligosanthos*). Bx2 and Bx6 genes support the common ancestor of Andropogoneae and Paniceae as the donor of Bx genes in Triticeae. However, five other Bx genes show discordant topologies, implying that the transfer event may have taken place at a time close to the divergence of Andropogoneae and Paniceae, which would result in an ILS-like phylogeny. It is noteworthy that phylogenies of individual genes based on different sequence types (e.g., amino acid or nucleotide sequences), different substitution models, and even different parameters are sometimes misleading. For example, in the phylogenies of Bx1, Triticeae and Andropogoneae (*Z. mays*) Bx1 genes formed a monoclade in the protein sequence tree, whereas Bx1 genes from Triticeae and Paniceae formed a monoclade in the nucleotide sequence trees (CDS, codon12, and codon3) (Figure 2A and Supplemental Figure 3).

Overall consistency in Bx gene order and orientation in Panicoideae implies that the Bx cluster was assembled before the divergence of Andropogoneae and Paniceae, although we could not detect sequence collinearity in Bx intergenic regions among clusters, reflecting the high evolutionary rate and weak selection pressure in intergenic regions (Figure 1B and Supplemental Figure 11). The dispersal distributions of Bx genes in Triticeae could result from HT of an intact Bx cluster and subsequent recurrent chromosomal rearrangements or from multiple independent HT events when Bx genes were not gathered together as an intact cluster (e.g., individual HT events for segments Bx1/Bx2, Bx3/Bx4/Bx5, and Bx8) or more complicated routes. Not unexpectedly, we found no conservation in intergenic regions of Bx genes from Bx clusters or subclusters in Panicoideae and Triticeae (Supplemental Figure 11). Based on the principle of parsimony in evolution and on empirical evidence for the occurrence frequency and possibility of HT and chromosomal rearrangement, we hypothesize that an intact Bx cluster has been transferred to Triticeae (Figure 5). With subsequent massive

genome reshuffling in Triticeae, the intact ancient Bx cluster was split into segments and scattered on multiple chromosomes (Frey et al., 2009). Gene loss resulted in the partial loss of Bx genes (e.g., *T. urartu*) and the complete loss (e.g., *H. vulgare*) in Triticeae.

The positional relationship between the Bx cluster and Bx6 in grass appears to be dynamic. In Panicoideae, Bx6 and the Bx cluster are both located on chromosome 4 in *Z. mays*, whereas they are separated on different chromosomes in *Echinochloa* (Figure 1B). In Triticeae, Bx6 genes are located on chromosome 2 in *Triticum/Aegilops*, and Bx1 and Bx2 genes are on chromosome 4, whereas in *Secale*, these three Bx genes are on chromosome 7R, despite the fact that Bx1 and Bx2 are over 700 Mb away from the two tandemly duplicated Bx6 genes. In contrast to the lack of synteny between Bx6 genes from maize and *Echinochloa*, Bx6 genes are syntenic between *Triticum/Aegilops* and *Secale*. Comparison between genomes indicates that chromosome 7R in rye is syntenic to chromosomes 5, 4, 7, and 2 in *Triticum/Aegilops* (Supplemental Figure 12). Therefore, in brief, *Secale*-specific chromosome fusions led to the location of Bx1, Bx2, and Bx6 on chromosome 7R in rye, a pattern not seen in the genomes of *Triticum/Aegilops* and the outgroup, *Hordeum* (Supplemental Figure 12).

In terms of the challenge of determining whether Bx genes were transferred to Triticeae as an intact cluster or through multiple HT events, it is difficult to trace the route by which Bx6 was transferred, with or without the Bx cluster. However, given that the genes in the Bx cluster and Bx6 show almost the same evolutionary phylogenies and that Bx6 catalyzes the reaction that follows those catalyzed by the gene products of the Bx cluster, it is reasonable to speculate that Bx6 co-evolved with the Bx cluster and may have been located in an ancient Bx cluster with the other Bx genes (Figure 5). In this hypothesis, the common ancestor of Panicoideae had a cluster of Bx genes, including Bx6, and the intact ancient Bx cluster was transferred to Triticeae via a single HT event. After the divergence of Andropogoneae and Paniceae, different genomic rearrangements occurred in the

## Plant Communications

two tribes (Figure 5). In Andropogoneae, the Bx cluster and *Bx6* were retained in *Z. mays* but lost completely in other species (e.g., *S. bicolor* and *Miscanthus sinensis*). Furthermore, *Bx6* was separated from the Bx cluster by translocation in *Z. mays*, although it is still on the short arm of chromosome 4. In Paniceae, massive losses are found in the Bx genes. The Bx cluster is retained in *D. oligoanthes*, but *Bx6* is lost. By contrast, *Bx6* has been retained in *Setaria* and *Digitaria*, but the Bx clusters are missing. Both the Bx cluster and *Bx6* are absent in *Panicum*, *Cenchrus*, and *Alloteropsis*. *Echinochloa* is the only genus in which the Bx cluster and *Bx6* are on two chromosomes (Figure 1B). Nonetheless, we cannot exclude the possibility that *Bx6* was transferred independently and has never been gathered together with the other Bx genes in a cluster, based on current genomic evidence.

### Horizontal gene transfer in plants

HT is an important driving force of trait innovation in various levels of organisms (Soucy et al., 2015). In plants, HT is commonly seen between parasites and corresponding host species and between grafting rootstock and scion, owing to their intimate physical cell-to-cell contacts (Kim et al., 2014; Fuentes et al., 2014). HT can also emerge without direct contact, a phenomenon that has been studied somewhat in grasses (Hibdige et al., 2021; Dunning et al., 2019; Park et al., 2021). In addition to gene elements, transposon elements have also been transferred among divergent grass species, as in the *Echinochloa* genus and the *Oryza punctata* lineage (Park et al., 2021). Among these reported HT events, a few have involved large genomic segments. A block containing 10 protein-coding genes was transmitted from *Iseilema membranaceum* (Andropogoneae) to *Alloteropsis semialata* (Panicoideae) (Dunning et al., 2019). Here, we provide strong and unambiguous evidence that seven Bx biosynthetic genes in Triticeae are derived from an ancestral Panicoideae donor via HT (Figure 5). HT occurs more frequently between closely related species (Soucy et al., 2015; Hibdige et al., 2021), whereas Triticeae and Panicoideae were split more than 50 mya. DNA transfer events from Panicoideae to Triticeae have been reported before. Several nuclear ribosomal DNA (rDNA) sequences in wild *Hordeum* and *Elymus* species are *Panicum*-like, indicating their foreign origins (Mahelka and Kopecký, 2010; Mahelka et al., 2017). Recently, a large chromosomal segment (~68 kb) harboring five stress-related protein-coding genes was reported to have been transferred from *Panicum* to wild *Hordeum* species (Mahelka et al., 2021; Verhage, 2021). Some of these genes remain functional in the recipient *Hordeum* genomes. These cases suggest that the transfer of exotic DNA is not as rare among plants as previously supposed (Mahelka et al., 2021), at least from Panicoideae to Triticeae in grasses. It is reasonable to infer that more HT events from Panicoideae to Triticeae may be detected in future studies and that this unidirectional and biased HT pathway has accelerated the capacity to respond to environmental stress in Triticeae.

Compared with previously reported plant-to-plant transfers, here, we provide the first candidate case of HT of an intact gene cluster that functions in the biosynthesis of multi-effect chemical compounds in plants. The clustering of a series of biosynthetic genes facilitates inheritance and stress response

## Horizontal Transfer of a Plant Biosynthetic Gene Cluster

by co-inheritance and co-expression in organisms, making it an ingenious invention in long-term adaptive evolution. The combination of HT and gene clustering constitutes a rapid strategy for acquiring highly efficient weapons to defend against external stress. This phenomenon appears to be rare but universal in the kingdom of life, as transfers of BGCs have also been detected in fungi (Khaldi et al., 2008; Slot and Rokas, 2011; Reynolds et al., 2018). As for how the transfer between phylogenetically distant plant species occurs, a possible explanation is that it takes place because of occasional contact (e.g., natural grafting) or is facilitated by vector transfer (e.g., insects, fungi, viruses) (Wang et al., 2020; Xia et al., 2021). The transfer of DNA between insect vectors and plants has been reported recently. For example, whitefly has acquired the plant-derived phenolic glucoside malonyltransferase gene *BtPMT1* from a plant host, enabling it to neutralize plant toxin phenolic glucosides (Xia et al., 2021). Similarly, the transfer of *Fhb7* from the fungus *Epichloë* to *Thinopyrum* wheatgrass (Triticeae) provides broad resistance to both *Fusarium* head blight and crown rot in wheat (Wang et al., 2020).

### Natural selection on gene clusters

The driving forces for the organization and maintenance of BGCs remain in debate. Nevertheless, it is widely accepted that natural selection must inevitably shape their evolution. Selection analysis of BGCs is rare, owing to the limited identification of BGCs and comparable sequences. In Saccharomycetes, the galactose BGCs are widely conserved in terms of sequence and function, suggesting the influence of long-term purifying selection (Slot and Rokas, 2010). Balancing selection also plays roles in maintaining the diversity of BGCs, as in the case of the aflatoxin gene cluster in the fungus *Aspergillus parasiticus* (Carbone et al., 2007). In *Arabidopsis*, the thalianol BGC appears to be under relaxed selection compared with genes in the phytosterol biosynthetic pathway, but it is still under strong purifying selection (Liu et al., 2020). In this study, we used multiple copies of Bx genes and their corresponding native homologs across a broad range of grass species to profile the selection landscapes of Bx clusters. Similar to findings in the thalianol BGC, Bx genes in both Panicoideae and Triticeae show purifying selection. Compared with that on native homologs, selection on Bx genes in clusters is more constrained (Figure 4A). The strength of selection pressure is similar for *Bx6* and its native homologs in Panicoideae, perhaps as a result of the dispersal of *Bx6* away from other core Bx genes in the cluster. It has been suggested that lateral pathway genes are less constrained by selection pressure than early pathway genes in the biosynthesis of thalianol in *Arabidopsis* (Liu et al., 2020). Here, we noticed that *Bx6*, whose product functions after reactions catalyzed by enzymes encoded in the Bx cluster, exhibited the highest  $\omega$  value among the seven core Bx genes (Figure 4A). *Bx8*, which is within the Bx cluster, is less constrained than other Bx genes in the cluster. All of the identified Bx clusters or genes are transcribed in the various genomes and function in stress response, further indicating a role for purifying selection in conserving the functions of the Bx clusters.

### Subgenome dominance of gene clusters in polyploids

We found that several species identified as having Bx clusters or whole-set core Bx genes are polyploids (Figure 1B). In most cases, polyploidization confers stronger growth and higher tolerance to environmental stress relative to the original diploid (Soltis and Soltis, 2009; Van de Peer et al., 2017). On this basis, biosynthetic gene clustering further offers these species a powerful weapon with which to respond to external stimuli. To some extent, the existence of BGCs in these polyploids has assisted in allowing them to become major crops under artificial selection (e.g., hexaploid and tetraploid wheat, paleo-tetraploid maize) or successful agricultural weeds (hexaploid and tetraploid barnyardgrass). In polyploids, subgenome dominance usually exists in selection and gene expression. The dominance of BGCs in polyploids has not been well studied. Differential expression of Bx genes in hexaploid wheat has been detected (Nomura et al., 2005). The main contribution in hexaploid and tetraploid wheat is by subgenome B. In the hexaploid barnyardgrass *E. crus-galli*, we found obvious suppression of the expression of Bx genes from subgenome AH compared with the other two subgenomes (Figure 4C). The dominance pattern of Bx genes is consistent with the overall profiling across whole subgenomes, with a significantly higher proportion of suppressed genes in subgenome AH (Ye et al., 2020). Highly expressed metabolic genes tend to be preferentially retained after polyploidization owing to selection pressure (Gout et al., 2009). The selection on Bx genes from subgenome A is indeed less constrained than that on the other two Bx homologs (Figure 4B and Supplemental Figure 10). Furthermore, three out of four Bx gene losses in the *E. crus-galli* pedigree are from subgenome A (Supplemental Figure 8). More transposon elements on subgenome A have somewhat increased the degree of methylation, which could inactivate gene expression (Ye et al., 2020). As seen in the cases of wheat (Nomura et al., 2005) and barnyardgrass, genomic bias in the expression of Bx genes in polyploids is putatively derived from their tetraploid progenitors. Subsequent selection then shapes the PAV of Bx genes in each genome. Clearly, additional studies are needed to decipher the mechanism of dominance of BGCs in polyploids.

## MATERIALS AND METHODS

### Datasets

Amino acid sequences of whole-genome protein and coding nucleotide sequences of 40 grass genomes (including grass basal group: *Pharus latifolius*; Oryzoideae: *Zizania latifolia*, *Leersia perrieri*, *Oryza brachyantha*, *O. punctata*, *O. rufipogon*, *O. sativa*, *O. barthii*, and *O. glaberrima*; Bambusoideae: *Olyra latifolia* and *Bonia amplexicaulis*; Pooideae: *Brachypodium distachyon*, *B. stacei*, *Hordeum vulgare*, *Secale cereale*, *Triticum aestivum*, *T. dicoccoides*, *Aegilops tauschii*, and *T. urartu*; Chloridoideae: *Eragrostis curvula*, *E. nindensis*, *E. tef*, *Oropetium thomaeum*, *Cleistogenes songorica*, and *Zoysia japonica*; Panicoideae: *Zea mays*, *Sorghum bicolor*, *Miscanthus sinensis*, *Dichanthelium oligosanthes*, *Digitaria exilis*, *Panicum hallii*, *Setaria italica*, *S. viridis*, *Cenchrus purpureus*, *C. americanus*, *Alloteropsis semialata*, *Echinochloa crus-galli*, *E. oryzicola*, *E. colona*, and *E. haploclada*) and the outgroup species *Ananas comosus* were downloaded from Phytozome (<https://phytozome-next.jgi.doe.gov>) and the National Genomics Data Center (NGDC) (<https://ngdc.cncb.ac.cn>) (Supplemental Table 1). Polyploids with chromosome-level assemblies (hexaploid *T. aestivum*, *E. crus-galli*, and *E. colona* and tetraploid *T. dicoccoides*, *E. tef*, *C. songorica*, *M. sinensis*, *D. exilis*, *C. purpureus*, and *E. oryzicola*)

were split into subgenomes (Supplemental Table 1). A total of 54 diploid genomes or subgenomes were used to construct the grass phylogeny. OrthoFinder was used to identify single-copy orthologs in the 41 species genomes (Emms and Kelly, 2019). Individual phylogenetic trees of 45 single-copy genes were constructed using IQ-TREE (version 1.6.12) with the best substitution model from ModelFinder (Nguyen et al., 2015) and integrated into a species tree using ASTRAL (version 5.7.4) (Zhang et al., 2018). The divergence time was adopted from the TimeTree database ([www.timetree.org](http://www.timetree.org)) (Kumar et al., 2017).

### Identification of Bx genes in grass

The protein sequences of Bx genes in *Z. mays* (PH207) (*Bx1*, Zm00008a014942; *Bx2*, Zm00008a014943; *Bx3*, Zm00008a014937; *Bx4*, Zm00008a014938; *Bx5*, Zm00008a014940; *Bx6*, Zm00008a014884; *Bx7*, Zm00008a015292; *Bx8*, Zm00008a014941; *Bx9*, Zm00008a003056; *Bx10*, Zm00008a001636; *Bx11*, Zm00008a001638; *Bx12*, Zm00008a001639; *Bx13*, Zm00008a010377; and *Bx14*, Zm00008a008314) were used as bait to search Bx genes in grass species by BLASTP. The homologs of individual Bx genes were filtered by parameters of e-value less than  $1e^{-30}$  and identity greater than 50%. Homologs were then aligned using MAFFT (version 7.310) (Katoh and Standley, 2013), and phylogenetic trees were built using IQ-TREE with the substitution model parameters from ModelFinder with 1000 bootstrap replicates (Nguyen et al., 2015). Using the homologs in *A. comosus* or *P. latifolius* as the outgroup, we kept only the closest homologous copies of Bx genes across the grass family as native homologs. In Bx trees for which Bx homologs could not be found in the outgroup species *A. comosus* and *P. latifolius*, we referred to the topological relationships among homologs in the five subfamilies to identify Bx genes and their native homologs.

### Phylogenetic analysis

Bx homologs (Bx genes and native homolog Bx-like genes) were realigned using MAFFT (Katoh and Standley, 2013). Substitution models were selected using ModelFinder, and the maximum-likelihood phylogenetic trees were reconstructed by IQ-TREE using ultrafast bootstrap approximation (1000 replicates) for branch support (Nguyen et al., 2015). To examine the robustness of the phylogeny, especially the location of Bx clades and candidate HT events from Panicoideae to Triticeae, we compared the real and constraint trees for each Bx gene. Three tests on tree topologies, the RELL approximation, the SH test, and the AU test, were performed using IQ-TREE with 10 000 bootstrap replicates (Nguyen et al., 2015). AU and SH tests return p values; thus, a tree is rejected if its p value is less than 0.05. The RELL approximation test returns posterior weights. To eliminate the effects of protein sequence alignment gaps, we also used Gblocks (Castresana, 2000) to remove gaps from alignments with the parameter “-b4 = 5 -b5 = h.” The trimmed alignments of conserved regions were used in topology tests. Phylogenies of Bx genes based on CDS, codon12 (first and second positions within a codon), and codon3 (third position within a codon) were constructed using MAFFT for alignment and IQ-TREE with the best substitution model (ModelFinder) and 1000-replicate ultrafast bootstrap analysis (Nguyen et al., 2015).

### Genome synteny analysis

Whole-genome protein sequences were compared pairwise among the 40 grass species using BLASTP. The best hit for each blast search was retained. We also required that the e-value should be less than  $1e^{-30}$  and the identity greater than 50%. According to the physical positions of the genes on each chromosome of each species, the genes or proteins were ordered. We performed gene-to-gene synteny analysis among grass species based on the gene orders within each genome. Synteny or collinearity analysis between Bx clusters or gene regions based on nucleotide sequences was performed using MUMmer (version 4.0) (Marçais et al., 2018). The alignment parameter in the nucmer module was set as “-l 12 -g 200 -c 20.” Three randomly selected conserved blocks

## Plant Communications

between *E. haploclada* and *Z. mays* were determined by whole-genome protein sequence blast and integration by DAGchainer (Haas et al., 2004).

### Selection analysis

Selection pressure was measured by the indicator  $\omega$ , the ratio between non-synonymous substitution rate (dN) and synonymous substitution rate (dS), with  $\omega = 1$  usually indicative of neutral mutations,  $\omega < 1$  of purifying selection, and  $\omega > 1$  of diversifying positive selection. Bx homologs whose CDS or protein sequence lengths were greater than twice or less than half of the lengths of Bx genes or proteins in *Z. mays* were removed. Within each clade in the phylogenetic tree of each Bx gene, only one copy was retained in the following analysis within one (sub)genome for tandem duplicates, and duplicate copies with abnormal sequence lengths (usually much shorter) were removed. The CDS and protein sequences were aligned using MAFFT and PAL2NAL (Suyama et al., 2006). The dN and dS values were calculated using KaKs\_calculator with the NG model for all pairs of genes within each clade (Bx clade or native homolog clade) (Zhang et al., 2006).

### Gene expression analysis

RNA sequencing (RNA-seq) data from an analysis of *E. crus-galli* seedlings grown in a monoculture or co-cultured with rice were downloaded from NCBI (BioProject PRJNA268892) (Guo et al., 2017), and low-quality reads were removed using the NGS QC toolkit (version 2.3.348) (Patel and Jain, 2012). The clean reads were mapped to the chromosome-level reference genome of *E. crus-galli* (STB08) using TopHat (version 2.1.1) (Trapnell et al., 2012). Relative gene expression levels were quantified and normalized to fragments per kilobase of exon per million mapped fragments (FPKM) values using Cufflinks (version 2.2.1) (Trapnell et al., 2012). The determination of expression dominance and response contributions of Bx genes in subgenomes of *E. crus-galli* followed a previously described approach (Ye et al., 2020).

## SUPPLEMENTAL INFORMATION

Supplemental information is available at *Plant Communications Online*.

## FUNDING

This work was supported by grants from the Zhejiang Natural Science Foundation (LZ17C130001), and the Jiangsu Collaborative Innovation Center for Modern Crop Production, 111 Project (B17039).

## AUTHOR CONTRIBUTIONS

L.F. and D.W. conceived and designed the research. L.F. and C.-Y.Y. supervised the research. D.W. and B.J. carried out the data analysis. D.W., L.F., M.P.T., and C.-Y.Y. analyzed the findings and wrote the manuscript.

## ACKNOWLEDGMENTS

We are grateful to Jie Qiu (Shanghai Normal University) for insightful suggestions on the manuscript. The authors declare no competing interests.

Received: January 7, 2022

Revised: March 7, 2022

Accepted: March 23, 2022

Published: May 9, 2022

## REFERENCES

- Boycheva, S., Daviet, L., Wolfender, J., and Fitzpatrick, T.B. (2014). The rise of operon-like gene clusters in plants. *Trends Plant Sci.* **19**:447–459.
- Carbone, I., Jakobek, J.L., Ramirez-Prado, J.H., and Horn, B.W. (2007). Recombination, balancing selection and adaptive evolution in the aflatoxin gene cluster of *Aspergillus parasiticus*. *Mol. Ecol.* **16**:4401–4417.
- Castresana, J. (2000). Selection of conserved blocks from multiple alignments for their use in phylogenetic analysis. *Mol. Biol. Evol.* **17**:540–552.
- Dunning, L.T., Olofsson, J.K., Parisod, C., Choudhury, R.R., Moreno-Villena, J.J., Yang, Y., Dionora, J., Quick, W.P., Park, M., Bennetzen, J.L., et al. (2019). Lateral transfers of large DNA fragments spread functional genes among grasses. *Proc. Natl. Acad. Sci. U S A* **116**:4416–4425.
- Dutartre, L., Hilliou, F., and Feyereisen, R. (2012). Phylogenomics of the benzoxazinoid biosynthetic pathway of Poaceae: gene duplications and origin of the Bx cluster. *BMC Evol. Biol.* **12**:64.
- Emms, D.M., and Kelly, S. (2019). OrthoFinder: phylogenetic orthology inference for comparative genomics. *Genome Biol.* **20**:238.
- Frey, M., Chomet, P., Glawischnig, E., Stettner, C., Grun, S., Winklmair, A., Eisenreich, W., Bacher, A., Meeley, R.B., Briggs, S.P., et al. (1997). Analysis of a chemical plant defense mechanism in grasses. *Science* **277**:696–699.
- Frey, M., Schullehner, K., Dick, R., Fiesselmann, A., and Gierl, A. (2009). Benzoxazinoid biosynthesis, a model for evolution of secondary metabolic pathways in plants. *Phytochemistry* **70**:1645–1651.
- Fuentes, I., Stegemann, S., Golczyk, H., Karcher, D., and Bock, R. (2014). Horizontal genome transfer as an asexual path to the formation of new species. *Nature* **511**:232–235.
- Gladyshev, E.A., Meselson, M., and Arkhipova, I.R. (2008). Massive horizontal gene transfer in bdelloid rotifers. *Science* **320**:1210–1213.
- Gout, J.-F., Duret, L., and Kahn, D. (2009). Differential retention of metabolic genes following whole-genome duplication. *Mol. Biol. Evol.* **26**:1067–1072.
- Grün, S., Frey, M., and Gierl, A. (2005). Evolution of the indole alkaloid biosynthesis in the genus *Hordeum*: distribution of gramine and DIBOA and isolation of the benzoxazinoid biosynthesis genes from *Hordeum lechleri*. *Phytochemistry* **66**:1264–1272.
- Guo, L., Qiu, J., Li, L., Lu, B., Olsen, K., and Fan, L. (2018). Genomic clues for crop–weed interactions and evolution. *Trends Plant Sci.* **23**:1102–1115.
- Guo, L., Qiu, J., Ye, C., Jin, G., Mao, L., Zhang, H., Yang, X., Peng, Q., Wang, Y., Jia, L., et al. (2017). *Echinochloa crus-galli* genome analysis provides insight into its adaptation and invasiveness as a weed. *Nat. Commun.* **8**:1031.
- Haas, B.J., Delcher, A.L., Wortman, J.R., and Salzberg, S.L. (2004). DAGchainer: a tool for mining segmental genome duplications and synteny. *Bioinformatics* **20**:3643–3646.
- Handrick, V., Robert, C.A.M., Ahern, K.R., Zhou, S., Machado, R.A.R., Maag, D., Glauser, G., Fernandez-Penny, F.E., Chandran, J.N., Rodgers-Melnick, E., et al. (2016). Biosynthesis of 8-O-methylated benzoxazinoid defense compounds in maize. *Plant Cell* **28**:1682–1700.
- Hibdige, S.G.S., Raimondeau, P., Christin, P., and Dunning, L.T. (2021). Widespread lateral gene transfer among grasses. *New Phytol.* **230**:2474–2486.
- Jonczyk, R., Schmidt, H., Osterrieder, A., Fiesselmann, A., Schullehner, K., Haslbeck, M., Sicker, D., Hofmann, D., Yalpani, N., Simmons, C., et al. (2008). Elucidation of the final reactions of DIMBOA-glucoside biosynthesis in maize: characterization of *Bx6* and *Bx7*. *Plant Physiol.* **146**:1053–1063.
- Katoh, K., and Standley, D.M. (2013). MAFFT multiple sequence alignment software version 7: improvements in performance and usability. *Mol. Biol. Evol.* **30**:772–780.
- Khaldi, N., Collemare, J., Lebrun, M., and Wolfe, K.H. (2008). Evidence for horizontal transfer of a secondary metabolite gene cluster between fungi. *Genome Biol.* **9**:R18.

## Horizontal Transfer of a Plant Biosynthetic Gene Cluster



- Kim, G., LeBlanc, M.L., Wafula, E.K., DePamphilis, C.W., and Westwood, J.H. (2014). Genomic-scale exchange of mRNA between a parasitic plant and its hosts. *Science* **345**:808–811.
- Kominek, J., Doering, D.T., Opulente, D.A., Shen, X., Zhou, X., DeVirgilio, J., Hulfachor, A.B., Groenewald, M., Mcgee, M.A., Karlen, S.D., et al. (2019). Eukaryotic acquisition of a bacterial operon. *Cell* **176**:1356–1366.e10.
- Kumar, S., Stecher, G., Suleski, M., and Hedges, S.B. (2017). TimeTree: a resource for timelines, timetrees, and divergence Times. *Mol. Biol. Evol.* **34**:1812–1819.
- Li, B., Förster, C., Robert, C.A.M., Züst, T., Hu, L., Machado, R.A.R., Berset, J.-D., Handrick, V., Knauer, T., Hensel, G., et al. (2018). Convergent evolution of a metabolic switch between aphid and caterpillar resistance in cereals. *Sci. Adv.* **4**:1–15.
- Li, X., Cheng, J., Liu, X., Guo, X., Liu, Y., Fan, W., Lu, L., Ma, Y., Liu, T., Tao, S., et al. (2020). Origin and evolution of fusidane-type antibiotics biosynthetic pathway through multiple horizontal gene transfers. *Genome Biol. Evol.* **12**:1830–1840.
- Lind, A.L., Wisecaver, J.H., Lameiras, C., Wiemann, P., Palmer, J.M., Keller, N.P., Rodrigues, F., Goldman, G.H., and Rokas, A. (2017). Drivers of genetic diversity in secondary metabolic gene clusters within a fungal species. *PLoS Biol.* **15**:e2003583.
- Liu, Z., Cheema, J., Vigouroux, M., Hill, L., Reed, J., Paajanen, P., Yant, L., and Osbourn, A. (2020). Formation and diversification of a paradigm biosynthetic gene cluster in plants. *Nat. Commun.* **11**:5354.
- Ma, P.-F., et al. (2021). The *Pharus latifolius* genome bridges the gap of early grass evolution. *Plant Cell* **33** (4):846–864. <https://doi.org/10.1093/plcell/koab015>.
- Mahelka, V., and Kopecký, D. (2010). Gene capture from across the grass family in the allohexaploid *Elymus repens* (L.) Gould (Poaceae, Triticeae) as evidenced by ITS, *GBSSI*, and molecular cytogenetics. *Mol. Biol. Evol.* **27**:1370–1390.
- Mahelka, V., Krak, K., Fehrer, J., Caklová, P., Nagy Nejedlá, M., Cegan, R., Kopecký, D., and Šafář, J. (2021). A *Panicum*-derived chromosomal segment captured by *Hordeum* a few million years ago preserves a set of stress-related genes. *Plant J.* **105**:1141–1164.
- Mahelka, V., Krak, K., Kopecký, D., Fehrer, J., Šafář, J., Bartoš, J., Hobza, R., Blavet, N., and Blattner, F.R. (2017). Multiple horizontal transfers of nuclear ribosomal genes between phylogenetically distinct grass lineages. *Proc. Natl. Acad. Sci. U S A* **114**:1726–1731.
- Marçais, G., Delcher, A.L., Phillippy, A.M., Coston, R., Salzberg, S.L., and Zimin, A. (2018). MUMmer4: a fast and versatile genome alignment system. *PLoS Comput. Biol.* **14**:e1005944.
- Mehls, L.N., Handrick, V., Glauser, G., Barbier, H., Kaur, H., Haribal, M.M., Lipka, A.E., Gershenson, J., Buckler, E.S., Erb, M., et al. (2013). Natural variation in maize aphid resistance is associated with 2,4-dihydroxy-7-methoxy-1,4-benzoxazin-3-one glucoside methyltransferase activity. *Plant Cell* **25**:2341–2355.
- Nguyen, L., Schmidt, H.A., von Haeseler, A., and Minh, B.Q. (2015). IQ-TREE: a fast and effective stochastic algorithm for estimating maximum-likelihood phylogenies. *Mol. Biol. Evol.* **32**:268–274.
- Nomura, T., Ishihara, A., Yanagita, R.C., Endo, T.R., and Iwamura, H. (2005). Three genomes differentially contribute to the biosynthesis of benzoxazinones in hexaploid wheat. *Proc. Natl. Acad. Sci. U S A* **102**:16490–16495.
- Nützmann, H., Huang, A., and Osbourn, A. (2016). Plant metabolic clusters – from genetics to genomics. *New Phytol.* **211**:771–789.
- Nützmann, H.-W., and Osbourn, A. (2014). Gene clustering in plant specialized metabolism. *Curr. Opin. Biotechnol.* **26**:91–99.
- Nützmann, H.-W., Scazzocchio, C., and Osbourn, A. (2018). Metabolic gene clusters in eukaryotes. *Annu. Rev. Genet.* **52**:159–183.
- Park, M., Christin, P., and Bennetzen, J.L. (2021). Sample sequence analysis uncovers recurrent horizontal transfers of transposable elements among grasses. *Mol. Biol. Evol.* **38**:3664–3675.
- Patel, R.K., and Jain, M. (2012). NGS QC Toolkit: a toolkit for quality control of next generation sequencing data. *PLoS One* **7**:e30619.
- Reynolds, H.T., Vijayakumar, V., Gluck-Thaler, E., Korotkin, H.B., Matheny, P.B., and Slot, J.C. (2018). Horizontal gene cluster transfer increased hallucinogenic mushroom diversity. *Evol. Lett.* **2**:88–101.
- Rokas, A., Wisecaver, J.H., and Lind, A.L. (2018). The birth, evolution and death of metabolic gene clusters in fungi. *Nat. Rev. Microbiol.* **16**:731–744.
- Saarela, J.M., Burke, S.V., Wysocki, W.P., Barrett, M.D., Clark, L.G., Craine, J.M., Peterson, P.M., Soreng, R.J., Vorontsova, M.S., and Duvall, M.R. (2018). A 250 plastome phylogeny of the grass family (Poaceae): topological support under different data partitions. *PeerJ* **6**:e4299.
- Slot, J.C., and Rokas, A. (2011). Horizontal transfer of a large and highly toxic secondary metabolic gene cluster between fungi. *Curr. Biol.* **21**:134–139.
- Slot, J.C., and Rokas, A. (2010). Multiple GAL pathway gene clusters evolved independently and by different mechanisms in fungi. *Proc. Natl. Acad. Sci. U S A* **107**:10136–10141.
- Soltis, P.S., and Soltis, D.E. (2009). The role of hybridization in plant speciation. *Annu. Rev. Plant Biol.* **60**:561–588.
- Soucy, S.M., Huang, J., and Gogarten, J.P. (2015). Horizontal gene transfer: building the web of life. *Nat. Rev. Genet.* **16**:472–482.
- Sue, M., Nakamura, C., and Nomura, T. (2011). Dispersed benzoxazinone gene cluster: molecular characterization and chromosomal localization of glucosyltransferase and glucosidase genes in wheat and rye. *Plant Physiol.* **157**:985–997.
- Suyama, M., Torrents, D., and Bork, P. (2006). PAL2NAL: robust conversion of protein sequence alignments into the corresponding codon alignments. *Nucleic Acids Res.* **34**:W609–W612.
- Takos, A.M., and Rook, F. (2012). Why biosynthetic genes for chemical defense compounds cluster. *Trends Plant Sci.* **17**:383–388.
- Tralamazza, S.M., Rocha, L.O., Oggenfuss, U., Corrêa, B., and Croll, D. (2019). Complex evolutionary origins of specialized metabolite gene cluster diversity among the plant pathogenic fungi of the *Fusarium graminearum* species complex. *Genome Biol. Evol.* **11**:3106–3122.
- Trapnell, C., Roberts, A., Goff, L., Pertea, G., Kim, D., Kelley, D.R., Pimentel, H., Salzberg, S.L., Rinn, J.L., and Pachter, L. (2012). Differential gene and transcript expression analysis of RNA-seq experiments with TopHat and Cufflinks. *Nat. Protoc.* **7**:562–578.
- Van de Peer, Y., Mizrahi, E., and Marchal, K. (2017). The evolutionary significance of polyploidy. *Nat. Rev. Genet.* **18**:411–424.
- Verhage, L. (2021). A hitchhiker's guide to foreign genomes. *Plant J.* **105**:1139–1140.
- Von Rad, U., Hüttl, R., Lottspeich, F., Gierl, A., and Frey, M. (2002). Two glucosyltransferases are involved in detoxification of benzoxazinoids in maize. *Plant J.* **28**:633–642.
- Wang, H., Sun, S., Ge, W., Zhao, L., Hou, B., Wang, K., Lyu, Z., Chen, L., Xu, S., Guo, J., et al. (2020). Horizontal gene transfer of *Fhb7* from fungus underlies *Fusarium* head blight resistance in wheat. *Science* **80**:368.
- Wong, S., and Wolfe, K.H. (2005). Birth of a metabolic gene cluster in yeast by adaptive gene relocation. *Nat. Genet.* **37**:777–782.
- Wu, D., Shen, E., Jiang, B., Feng, Y., Tang, W., Lao, S., Jia, L., Lin, H.-Y., Xie, L., Weng, X., et al. (2022). Genomic insights into the

## Plant Communications

evolution of *Echinochloa* species as weed and orphan crop. Nat. Commun. **13**:689.

**Xia, J., Guo, Z., Yang, Z., Han, H., Wang, S., Xu, H., Yang, X., Yang, F., Wu, Q., Xie, W., et al.** (2021). Whitefly hijacks a plant detoxification gene that neutralizes plant toxins. Cell **184**:1693–1705.e17.

**Ye, C., Wu, D., Mao, L., Jia, L., Qiu, J., Lao, S., Chen, M., Jiang, B., Tang, W., Peng, Q., et al.** (2020). The genomes of the allohexaploid

## Horizontal Transfer of a Plant Biosynthetic Gene Cluster

*Echinochloa crus-galli* and its progenitors provide insights into polyploidization-driven adaptation. Mol. Plant **13**:1298–1310.

**Zhang, C., Rabiee, M., Sayyari, E., and Mirarab, S.** (2018). ASTRAL-III: polynomial time species tree reconstruction from partially resolved gene trees. BMC Bioinf. **19**:153.

**Zhang, Z., Li, J., Zhao, X., Wang, J., Wong, G.K., and Yu, J.** (2006). KaKs\_Calculator: calculating Ka and Ks through model selection and model averaging. Genomics. Proteomics Bioinformatics **4**:259–263.

**Plant Communications, Volume 3**

**Supplemental information**

**Horizontal transfer and evolution of the biosynthetic gene cluster for  
benzoxazinoids in plants**

**Dongya Wu, Bowen Jiang, Chu-Yu Ye, Michael P. Timko, and Longjiang Fan**

# **Horizontal Transfer and Evolution of the Biosynthetic Gene Cluster for Benzoxazinoid in Plants**

Dongya Wu, Bowen Jiang, Chu-Yu Ye, Michael P. Timko, Longjiang Fan\*

\*Correspondence: [fanlj@zju.edu.cn](mailto:fanlj@zju.edu.cn) (L.F.)

## **Supplemental Figures and Tables**



Sub-family

- Oryzoideae
- Bambusoideae
- Pooideae
- Panicoideae
- Chloridoideae

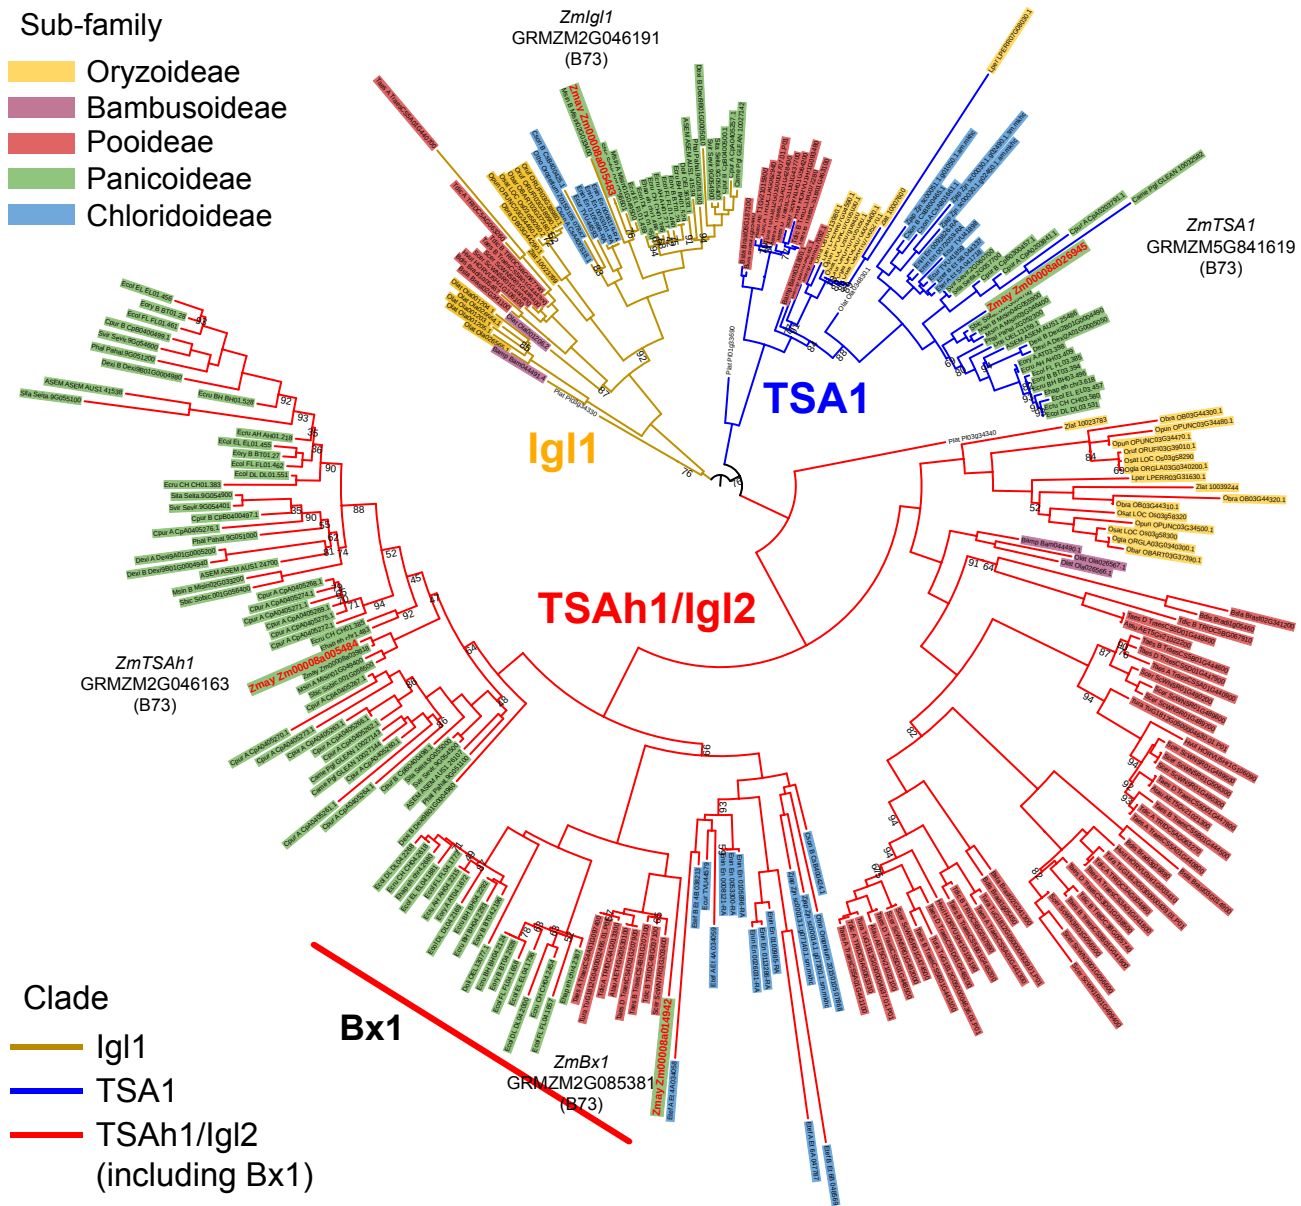

Clade

- Igl1
- TSA1
- TSAh1/Igl2 (including Bx1)

**Supplemental Figure 1** Maximum-likelihood phylogenetic tree of *Bx1* homologs. Three clades (Igl1, TSA1 and TSAh1) are indicated by branch colors. The sub-family information is shown by the background colors of labels. The Bx1 clade is highlighted by a red bold line. Bootstrap values less than 95 are shown on branches.

```

*      20      *      40      *      60      *
N1 : MAFALKASPYLSSSSAAASS-----SSSPALLPLPGQHAS-----ARVSRFPQAAITAPLAMGQA : 55
N2 : MATTTMKASP---MSASSSS-----APVLRRCVAVQPAR---VAAARRLAAAAASVALEASVPVA : 53
N3 : MAYA-VKASP---SSSAPS-----LPFRRRAAGAVV---TAGRRVKVRAALAAAALDPAAPA : 51
N4 : MAFALKASPSSTSSSSAPSHPRLRSAAAMAMPFGPAPASRAVA---AASAAASLEPAVVVPSPDSYWR : 68
N5 : MAF-ALKAS--PSTSSSSLAVQ-----SOLERRAAAVATM---PARRRAAAVRVMAITAAAPFA : 53
N6 : MAF-ALKAASYS--FSPADQ-----PSSLSLAATAAVKMPAGRGKAAAAVVIRAVAAAAPLS : 58
N7 : MALFAVQAASSTSSSSPAVLQ-----QSPLPSRAAAAAVKMPQR--KKAADVRAVAAPPAPV : 62
N8 : MAS-ALKAASSTSSQSSSPAAVH-----SSPLSKLPAAVA---MPGR-RRSVATVRAVAAPPAPFA : 58
B1 : ----- : -
B2 : MAF-ALNLS--CYPSFS-----SLLPWMAAAVMI---PRRRNVLPV--TKAVAVAPPA : 47
B3 : MAF-ALKTS--FSASSFQAGPSS-----SSLLPR-----RNGVSV--IRAVATVSTS : 43
B4 : MAF-SLNLN--SSPSFQAQAS-----SLLPRLSAVVTK---PRPRNVFV--IRAVATVVS-- : 49
      ma      a      r

*      80      *      100      *      120      *      140
N1 : ---AAAEKCN-VSQTFSRLRKCCKTAFIPYITAGDPDIAATTAALKLLDYCGADVIELGIPYSDLELADG : 123
N2 : A---AAAVERRMSVSOTMSKLEKCKTAFIPYITAGDPDICTTAEALRLLDAGCGADVIELGVFSDPYADG : 122
N3 : P---AAAGKRGRLSVSOTLSSREKCKTAFIPYITAGDPDICTTAEALRLLDAGCGADVIELGVFSDPYADG : 120
N4 : PLPLTPASERIPVAQAMSRARAHCKTAFIPYITAGDPDICTTAEALRLLDAGCGADVIELGVFSDPYADG : 140
N5 : BAPARPAAGRC-LPVSOTFAKLKAKCKTAFIPYITAGDPDIAATTAELRVLDAAGCGADVIELGVFSDPYADG : 124
N6 : BAPARSAAGRC-LPVSOTMARLKAQCKTAFIPYITAGDPDIAATTAELRLLDAGCGADVIELGVFSDPYADG : 129
N7 : BGPFPKNGERCRLPVSOTMSRLKAQCKTAFIPYITAGDPDIAATTAELRLLDAGCGADVIELGVFSDPYADG : 134
N8 : KLTAG-AGGRC-LPVSOTMSRLRAQCKTAFIPYITAGDPDIAATTAELRLLDAGCGADVIELGVFSDPYADG : 128
B1 : -----MAAMAKCKTAFIPYITAGDPDIAATTAELRLLDAGCGADVIELGVFSDPYADG : 54
B2 : BAPAKPFAVRSR-PVSVTMAKIMAKCKTAFIPYITAGDPDIAATTAELRLLDAGCGADVIELGVFSDPYADG : 118
B3 : BAPAKPFAVTTLPVSEETIAKIMAKCKTAFIPYITAGDPDIAATTAELRLLDAGCGADVIELGVFSDPYADG : 115
B4 : -BAPAKPFAVRCR--PVSDTIAKIMAKCKVVTCTLYVA-----HVVGS-TLELCIT- : 94
      a      vs t l      Gkta ipy tagdp      ttaeal ld cGadv6ELG6p sdp dg

*      160      *      180      *      200      *
N1 : PVIQASASRALAKC--ATTDVMMMLKEVTPELSCPVVLSYFNPIVRRGADFAAAAVKTAGHGLIVPDLE : 193
N2 : PVIQASASRALAAG--ATPEAVLSMLKEVTPELSCPVVLSYFGPIVRRGASVTAAVKTAGHGLIVPDLE : 192
N3 : PVIQASASRALAGG--ATADGVMSMLKEVTPELSCPVVLSYFGPIVRRGASVTAAVKTAGHGLIVPDLE : 190
N4 : AVIQASAKRALAAG--ATTDVMMMLREVTPELSCPVVLSYFNPIVRRGTRSFAAAARAGVKGGLIIPDLE : 210
N5 : PVIQASASRALASG--TTPDGVLMMLREVTPELSCPVVLSYFNPIVRRGSDFTAAAKTAGHGLIVPDLE : 194
N6 : PVIQASARALASG--TTPDGVLMMLREVTPELSCPVVLSYFNPIVRRGADFAAAAVKTAGHGLIVPDLE : 199
N7 : PVIQASMARARTTCGGATPDGVLMMLREVTPELSCPVVLSYFNPIVRRGTPGFAAAAVKTAGHGLIVPDLE : 206
N8 : PVIQASARALASG--TTPDGVLMMLKEVTPELSCPVVLSYFNPIVRRGADFAAAAVKTAGHGLIVPDLE : 198
B1 : PVIQASARALASG--TMDAVLMMLREVTPELSCPVVLSYFNPIVRRG-----AEMKTAGVHGLIVPDLE : 120
B2 : PVIQASARALAGG--ATMDGVLMMLREVTPELSCPVVLSYFNPIVRRG-----AETKTAGVHGLIVPDLE : 184
B3 : PVIQASARALAGG--TMDGVLMMLREVTPELSCPVVLSYFNPIVRRG-----AETKTAGVHGLIVPDLE : 181
B4 : PVIQASARALAGG--TMDGVLMMLREVTPELSCPVVLSYFNPIVRRG-----AETKTAGVHGLIVPDLE : 160
      p 6QAS RAla G T d v6 ML4EvtPeLSCPv66f3Y PI g A 4eAG GL66PDLE

*      220      *      240      *      260      *      280
N1 : LENAGIL--RNSIKNNLELVLLTTPAIPEDRMKEITKASEGFVYLVSVNGVTGERANVNRVQKLLQIHK : 263
N2 : YVDTCTF--RSEAIKNNLELVLLTTPAIPEDRMKEITKASEGFVYLVSVNGVTGERPKVNRVQKLLQIHK : 262
N3 : YVETCEF--RNSIKNNLELVLLTTPAIPEDRMKEITKASEGFVYLVSVNGVTGERANVNRVQKLLQIHK : 260
N4 : WDEIRAF--RKEAIKNNLELVLLTTPAIPEDRMKEITKASEGFVYLVSVNGVTGERANVNRVQKLLQIHK : 280
N5 : CVAECTL--KSEAMKNNLELVLLTTPAIPEDRMKEITKASEGFVYLVSVNGVTGERANLNSRVOSLQIHK : 264
N6 : YGATCAL--RSEAIKNNLELVLLTTPAIPEDRMKEITKASEGFVYLVSVNGVTGERANVNRVQKLLQIHK : 269
N7 : YADTCAL--RSEAIKNNLELVLLTTPAIPEDRMKEITKASEGFVYLVSVNGVTGERADVNRVQKLLQIHK : 276
N8 : YGNSCALTLRTEAIKNNLELVLLTTPAIPEDRMKEITKASEGFVYLVSVNGVTGERANVNRVQKLLQIHK : 270
B1 : YVAHSL--WSEAKNNLELVLLTTPAIPEDRMKEITKASEGFVYLVSVNGVTGERANVNRVQKLLQIHK : 190
B2 : YVAHAL--WSEAKNNLELVLLTTPAIPEDRMKEITKASEGFVYLVSVNGVTGERANVNRVQKLLQIHK : 254
B3 : YVAHAM--WSEAKNNLELVLLTTPAIPEDRMKEITKASEGFVYLVSVNGVTGERANVNRVQKLLQIHK : 251
B4 : YVAHAL--WSDAKNNLELVLLTTPAIPEDRMKEITKASEGFVYLVSVNGVTGERANVNRVQKLLQIHK : 230
      y      ea n lELVLLTTP tP RM It As GF6Ylv36 GVTG R 6N rv l6qe64

*      300      *      320      *      340      *      360
N1 : VTDKAVAVGFGISTPEHVQQAQWAGADGVIIIGSAMVROLGEAASPKQ-----GLRR----- : 314
N2 : VTDKAVAVGFGISTPEHVRQIAWAGADGVIIIGSAMVROLGEAASPKQ-----GLKR----- : 313
N3 : VTDKAVAVGFGISTPEHVRQIAWAGADGVIIIGSAMVROLGEAASPKQ-----GLRR----- : 311
N4 : VTDKELAVGFGISTPEHVSQISEWAGADGVIIIGSAMVROLGEAASPRE-----GLKR----- : 331
N5 : VTDKPVAVGFGISKPEHVQQAQWAGADGVIIIGSAMVROLGERALS-----HRGPTSRHARTRMLYSKFRVRRNLFI : 336
N6 : VTDKPVAVGFGISKPEHVQQAQWAGADGVIIIGSAMVROLGEAASPKQ-----GLKR----- : 320
N7 : VTDKPVAVGFGISKPEHVQQAQWAGADGVIIIGSAMVROLGEAASPKQ-----GLKR----- : 327
N8 : VTDKPVAVGFGISKPEHVQQAQWAGADGVIIIGSAMVROLGEAASPKQ-----GLKR----- : 321
B1 : VTNKPVAVGFGISKPEHVQ-----OLGEAASPKQ-----GLRR----- : 223
B2 : VTDKPVAVGFGISKPEHVQQAQWAGADGVIIIGSAMVROLGEAASPRE-----GLKR----- : 305
B3 : VTDKPVAVGFGISKPEHVQQAQWAGADGVIIIGSAMVROLGEAASPKQ-----GLKR----- : 302
B4 : VTDKPVAVGFGISKPEHVQQAQWAGADGVIIIGSAMVROLGEAASPKQ-----GLKR----- : 281
      VT k 6avGFGIS P HV q a wGadgviigsamv QLgea sp G64R

```

**Supplemental Figure 2** Alignment of amino acid sequences of *Bx1* genes (B) and native homologs (N). See detailed sequences ID in Figure 2A.

**A**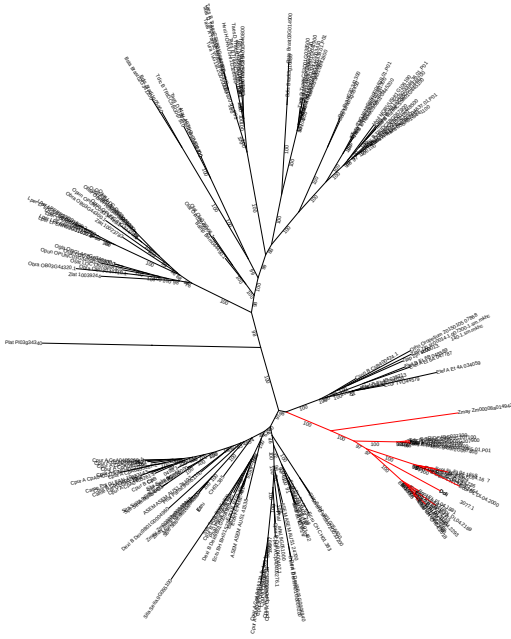**B**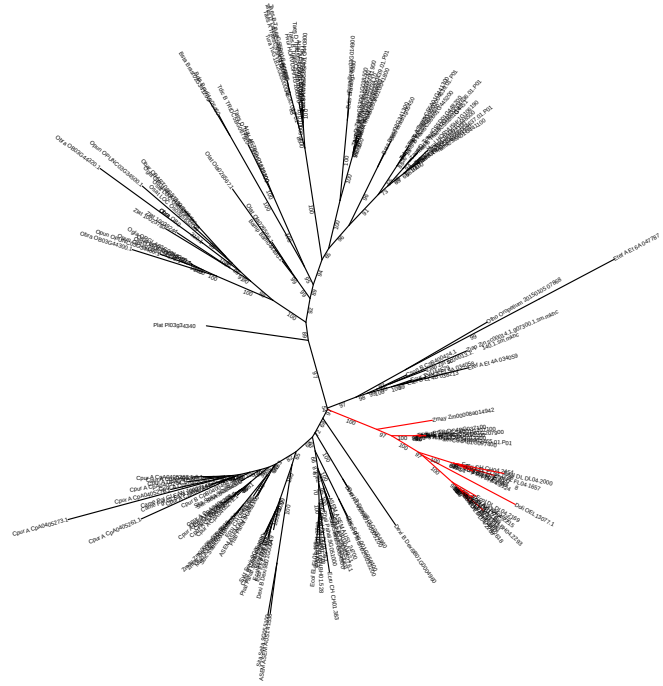

**Supplemental Figure 3** Phylogenies of *Bx1* based on CDS (A) and codon12 (B) datasets. Red branches indicate the *Bx1* clade. Bootstrap values are shown on branches.

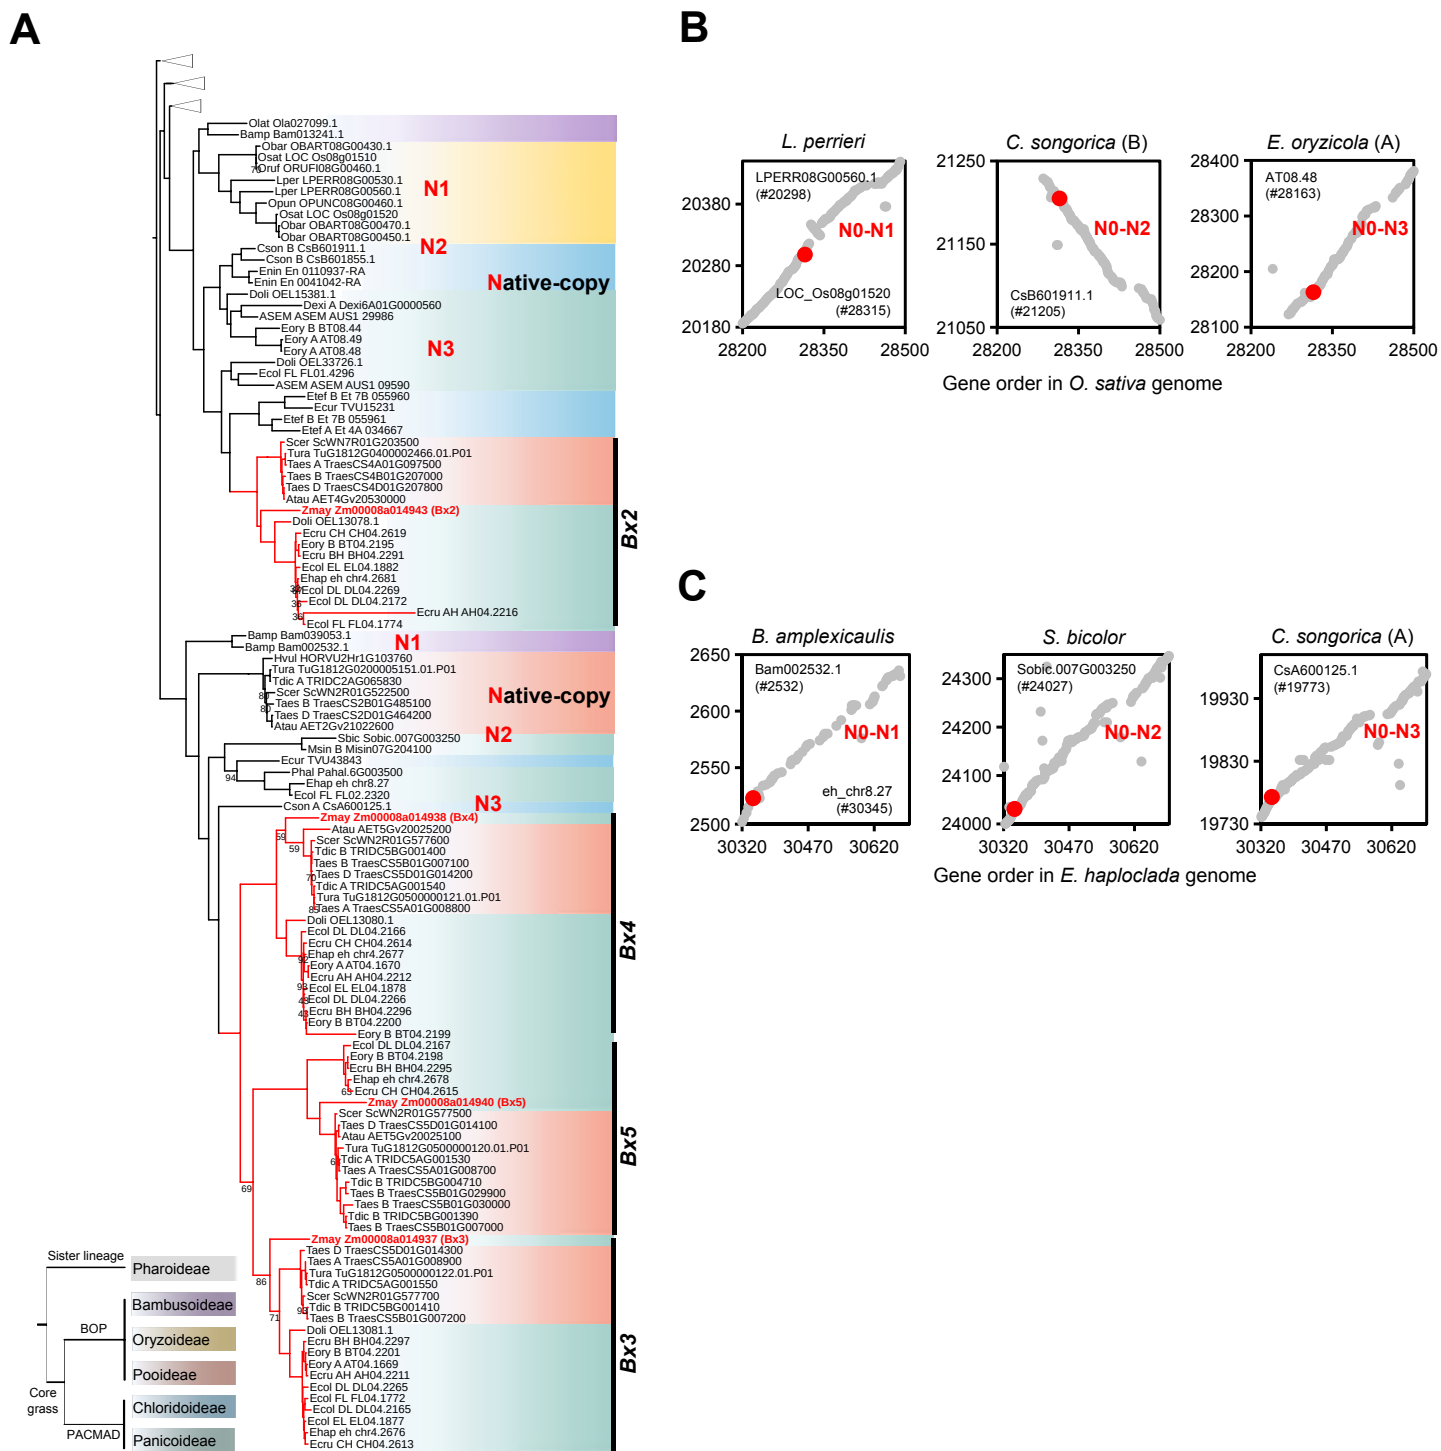

**Supplemental Figure 4** Phylogeny of *Bx2* to *Bx5* homologs (A) and genomic synteny of *Bx2* (B) and *Bx5* (C) regions across the grass family. The branches of *Bx2* and *Bx3*-*Bx5* clades are highlighted by red. Bootstrap values less than 95 are shown on branches.



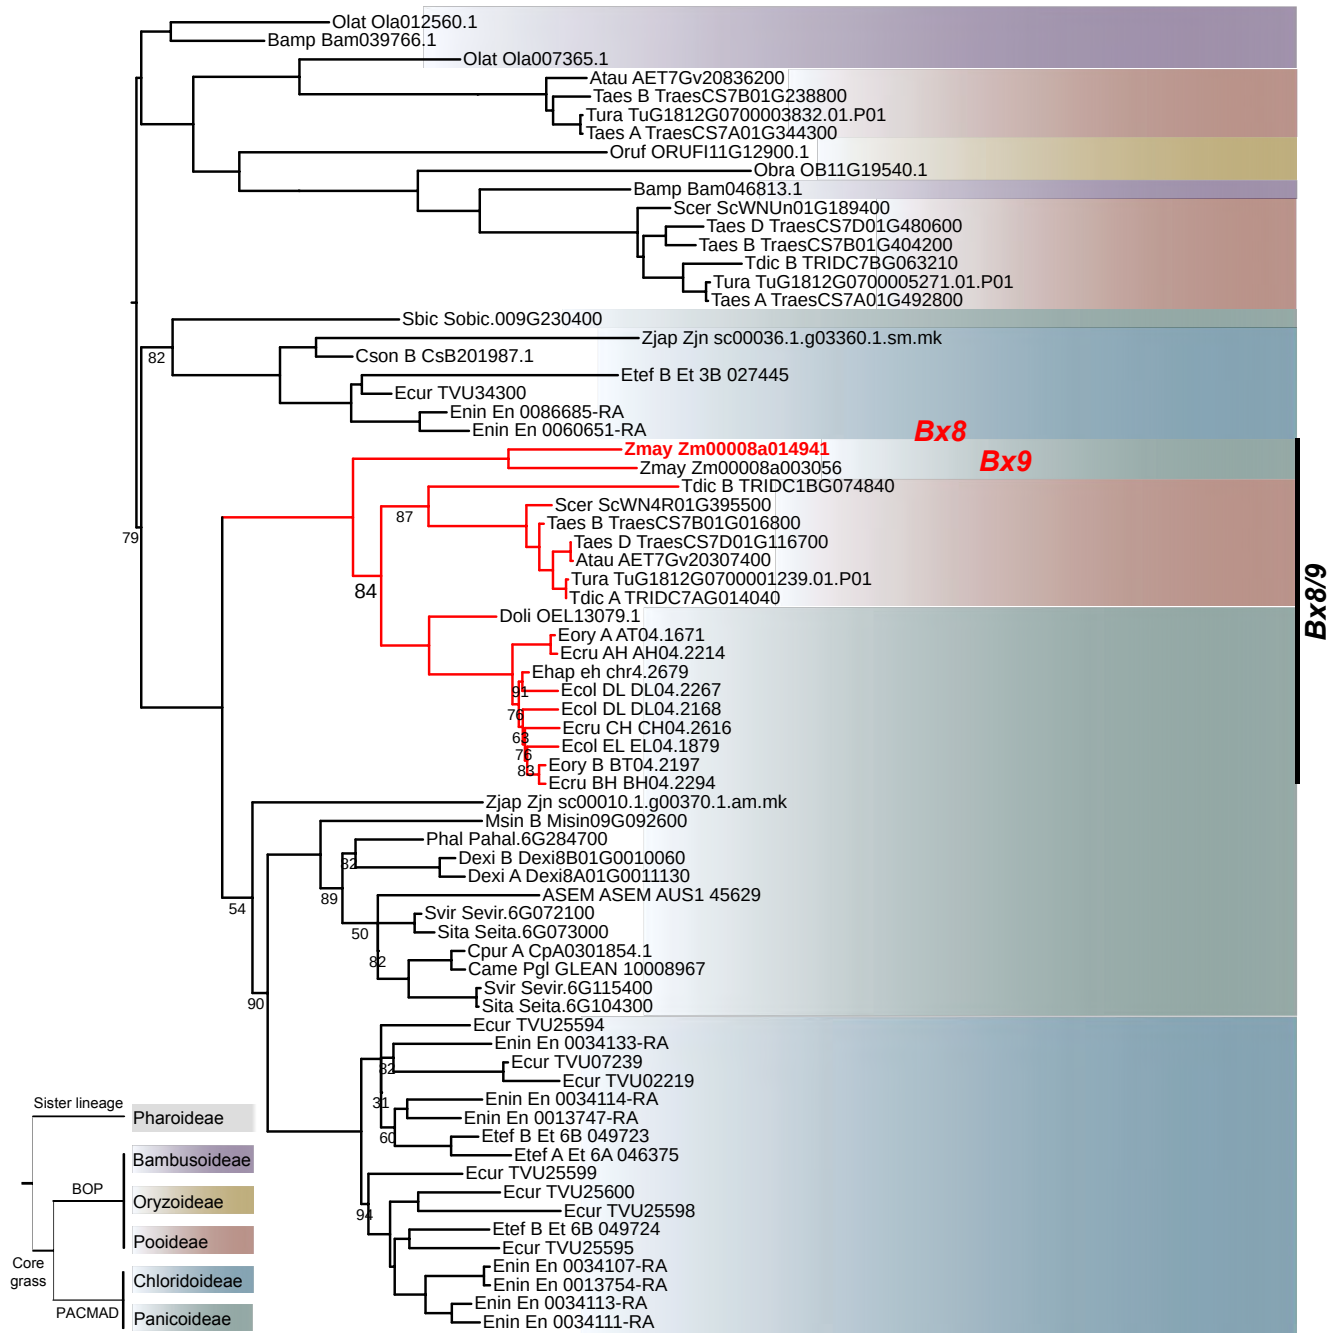

**Supplemental Figure 5** Phylogeny of *Bx8* and *Bx9* homologs across the whole grass family. The branches of *Bx8/Bx9* clade are highlighted by red. Bootstrap values less than 95 are shown on branches.

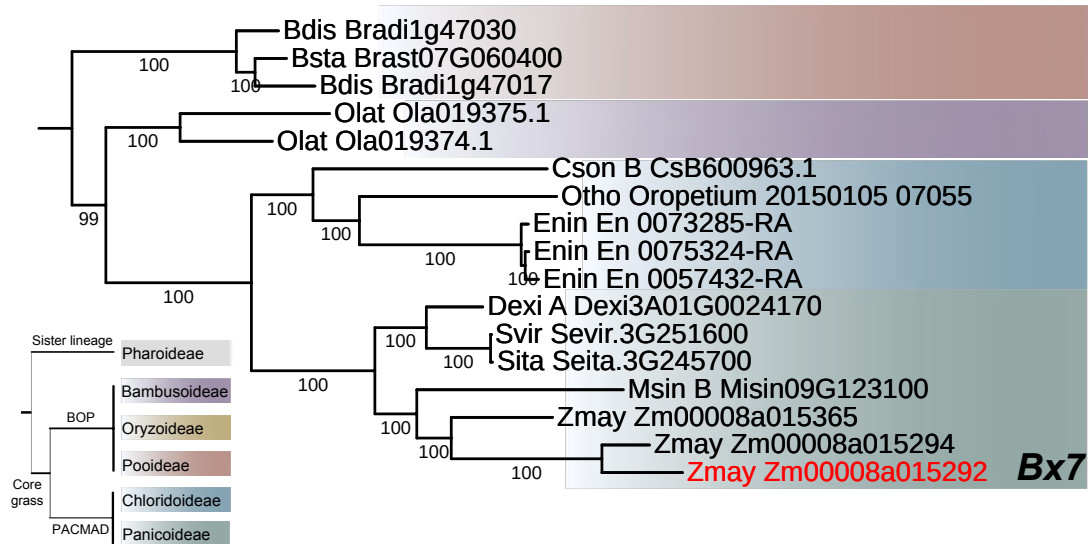

**Supplemental Figure 6** Phylogeny of *Bx7* homologs across the grass family.

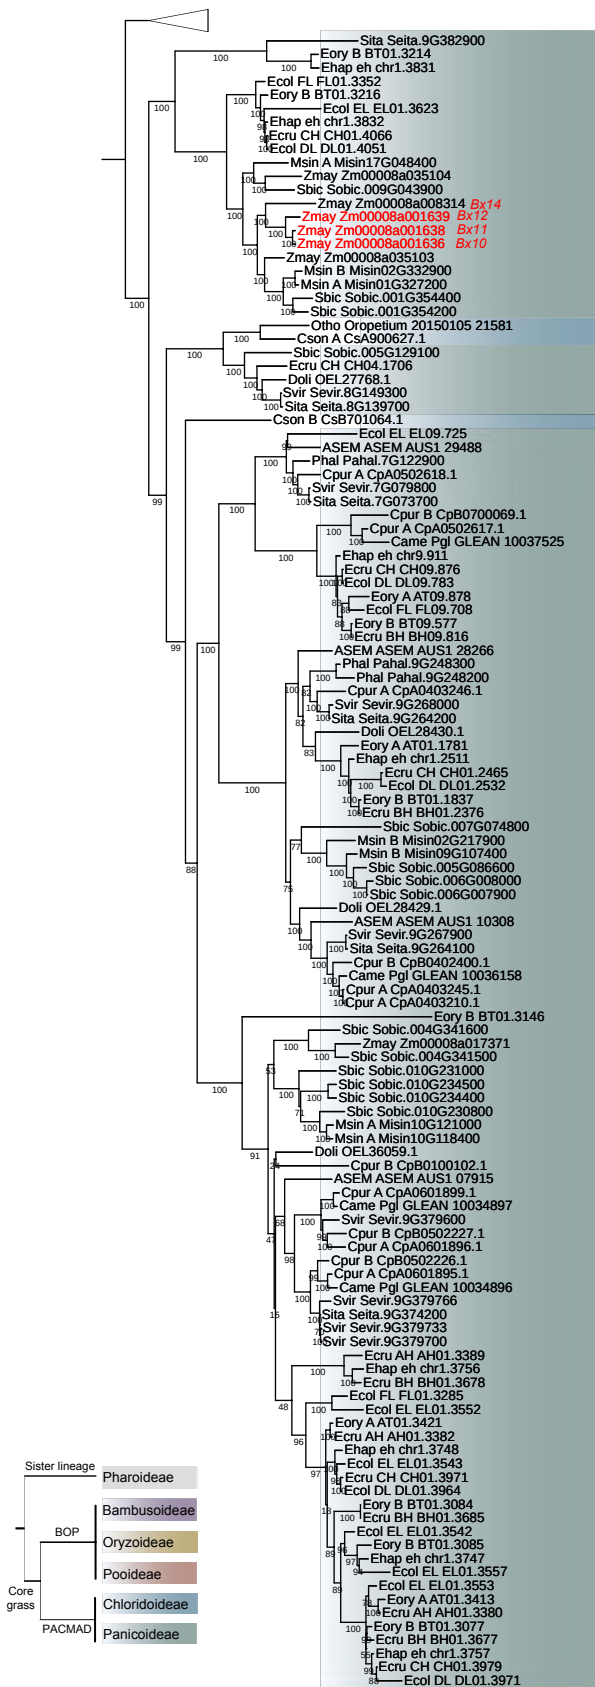

Bx10/11/12/14

Supplemental Figure 7 Phylogeny of Bx10 to Bx12 and Bx14 homologs across the whole grass family.

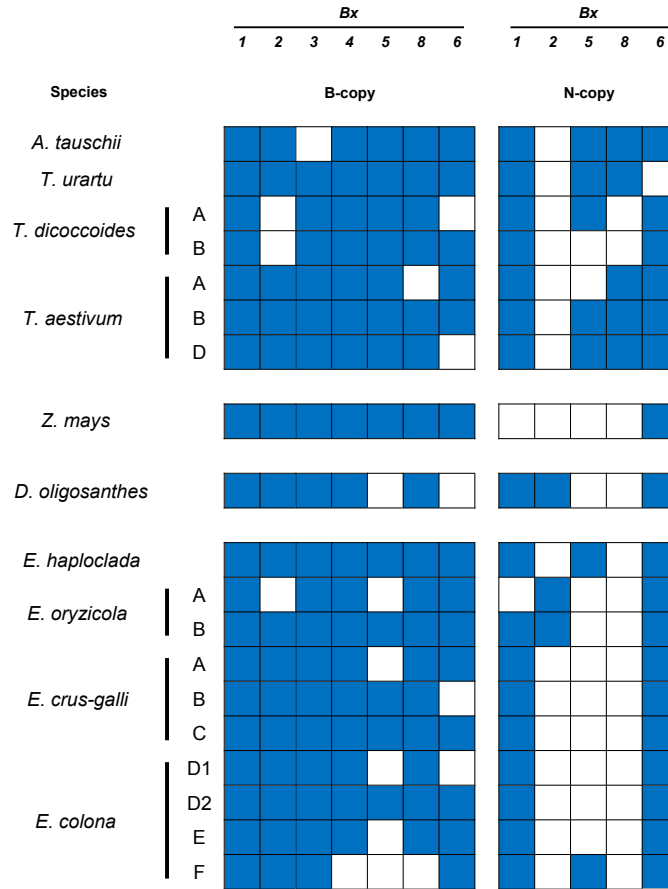

**Supplemental Figure 8** Presence and absence of Bx genes (B-copy) and native homologs (N-copy) in Triticeae and Panicoideae. Blue grids represent presence and white represent absence.



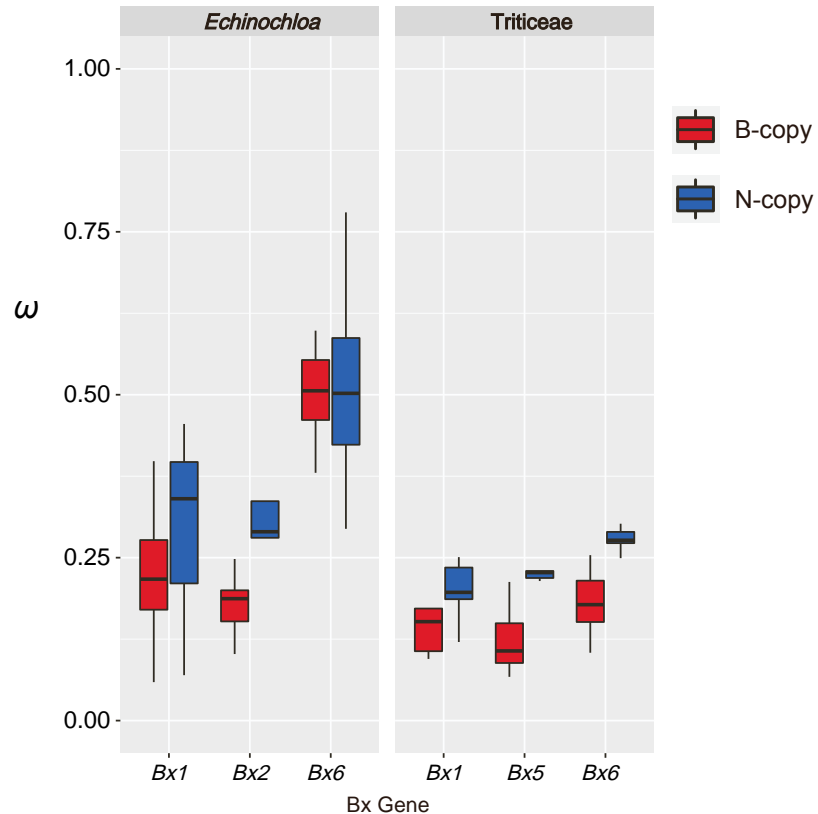

**Supplemental Figure 9** Selection pressure on Bx genes in *Echinochloa* and Triticeae. In the box plots, the horizontal line shows the median value, and the whiskers show the 25% and 75% quartile values of  $\omega$ . B-copy, Bx genes; N-copy, native homologs of Bx genes.

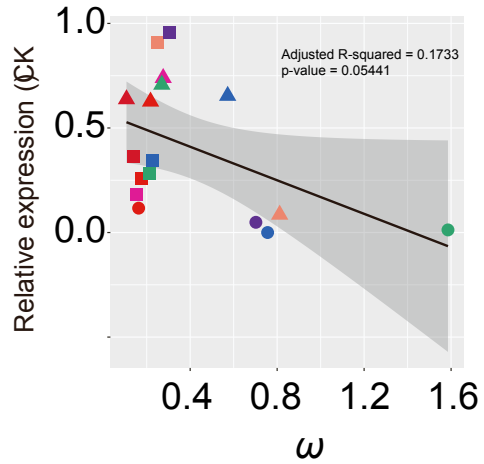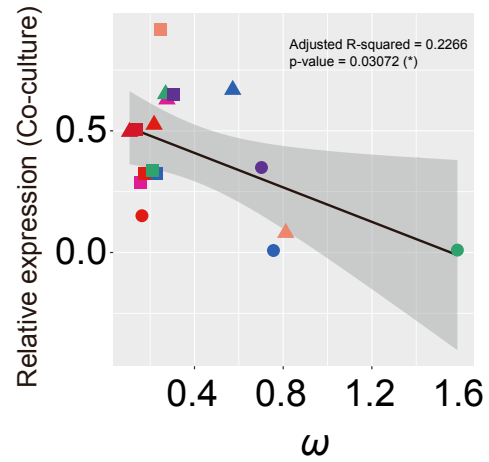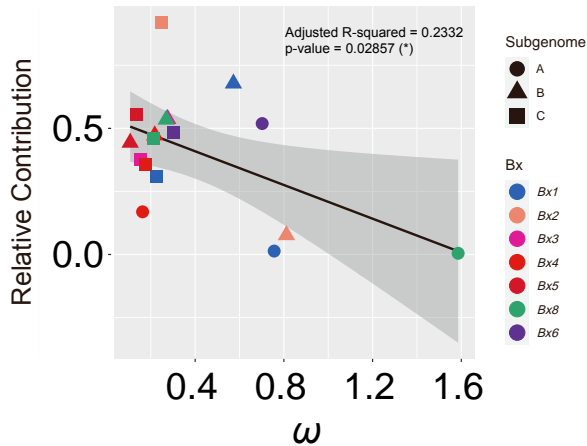

**Supplemental Figure 10** Negative relationship between selection indicator  $\omega$  values and gene expression or response dominance in *E. crus-galli*.

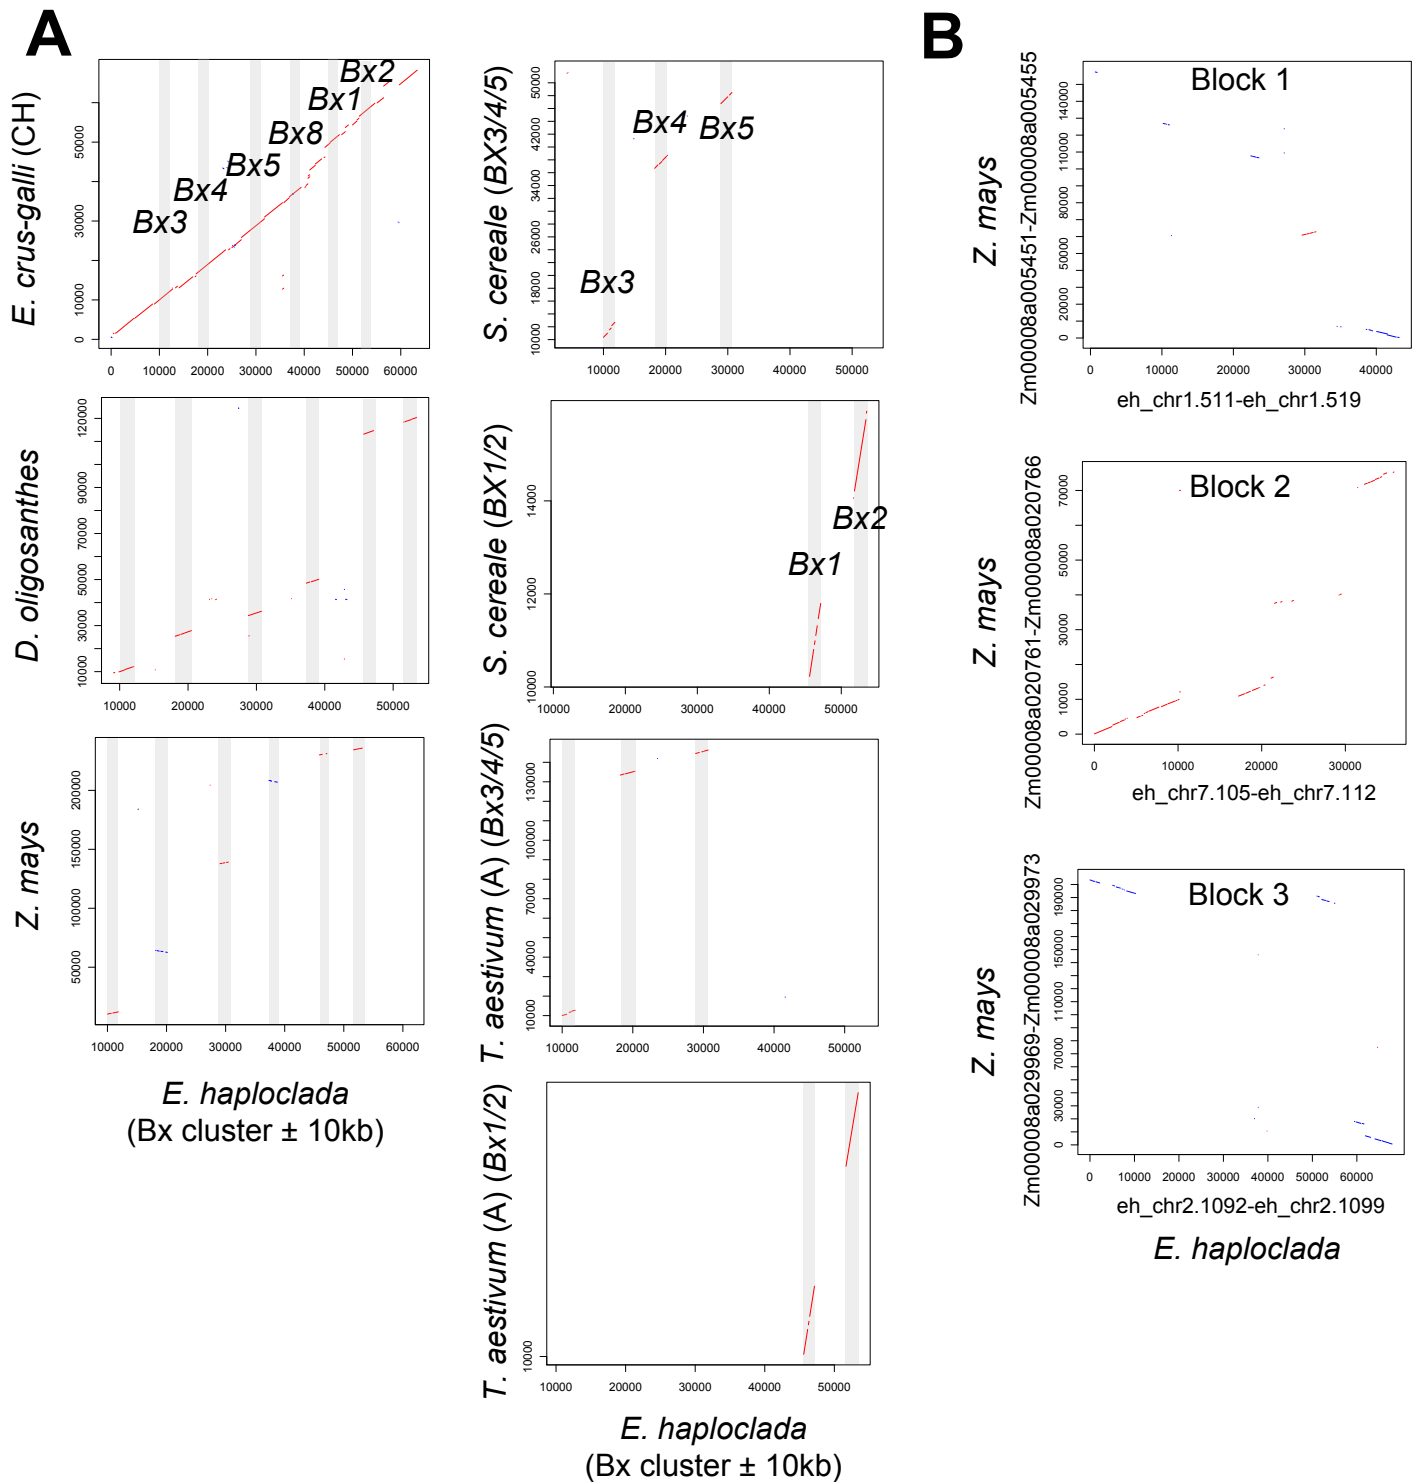

**Supplemental Figure 11** Genomic synteny among Bx cluster elements (gene and intergenic regions) in grass genomes based on nucleotide sequences. **(A)** the synteny plots between Bx clusters from *E. haploclada* and other grass genomes (*E. crus-galli* CH, *D. oligosanthos*, *Z. mays*, *S. cereale* and *T. aestivum* A). The gray shadows indicate the positions of Bx genes in *E. haploclada* (from left to right: Bx3, Bx4, Bx5, Bx8, Bx1 and Bx2). Red and blue colors represent consistent and opposite orientations between two collinear genetic elements, respectively. **(B)** Synteny plots of three randomly selected evolutionarily conserved blocks between *E. haploclada* and *Z. mays*. The genomic region information is shown near the axis.

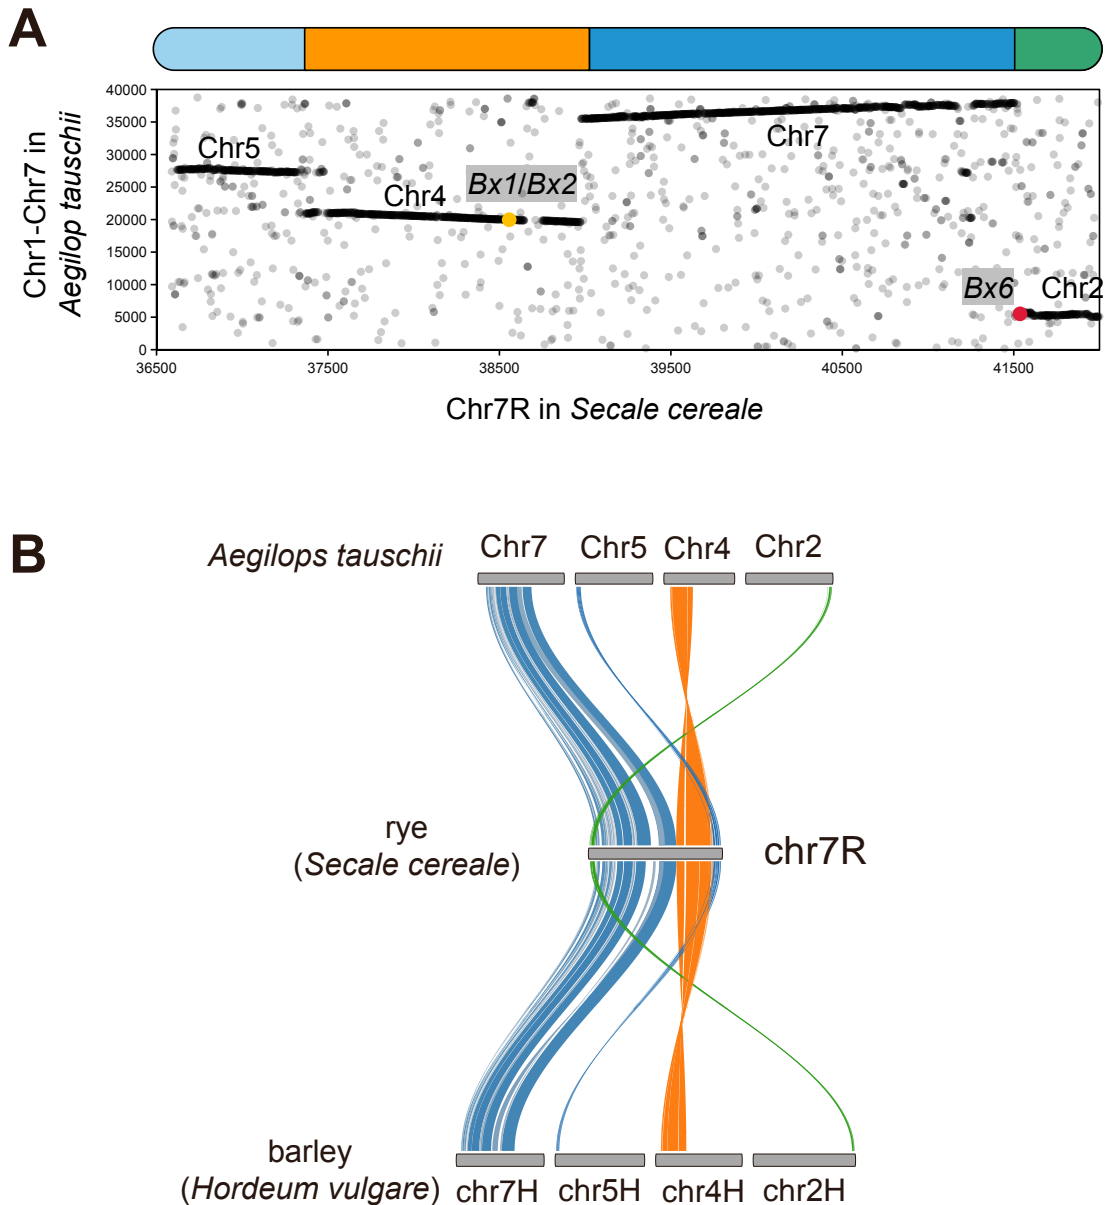

**Supplemental Figure 12** Genomic synteny between chromosome 7R in rye (*S. cereale*) and other Triticeae genomes. **(A)** Chromosome 7R in rye is syntenic to chromosomes 5, 4, 7 and 2 in *Triticum/Aegilops*. *Bx1* and *Bx2* are located on chromosome 4 and *Bx6* on chromosome 2 in *Triticum/Aegilops*, while they all are on chromosome 7R in *Secale*. **(B)** Synteny among *A. tauschii*, *S. cereale* and *H. vulgare* genomes. Considering *Hordeum* is the outgroup genus of *Secale* and *Aegilops*, the chromosomal fusions of 7R in rye are *Secale*-specific.

**Supplemental Table 1. A list of plant genomes used in this study**

| Lineage                | Sub-family               | Species                           | Ploid      | Assembly level | Version          | Genome Abbr.           |
|------------------------|--------------------------|-----------------------------------|------------|----------------|------------------|------------------------|
| Outgroup               | Bromeliaceae             | <i>Ananas comosus</i>             | 2          | chromosome     | F153             | Acom                   |
| Pharoideae             | Pharoideae               | <i>Pharus latifolius</i>          | 2          | chromosome     | 60161            | Plat                   |
| BOP                    | Bambusoideae             | <i>Olyra latifolia</i>            | 2          | scaffold       | /                | Olat                   |
|                        |                          | <i>Bonia amplexicaulis</i>        | 6          | scaffold       | /                | Bamp                   |
|                        | Oryzoideae               | <i>Leersia perrieri</i>           | 2          | chromosome     | GCA_000325765.3  | Lper                   |
|                        |                          | <i>Oryza barthii</i>              | 2          | chromosome     | GCA_000182155.2  | Obar                   |
|                        |                          | <i>Oryza brachyantha</i>          | 2          | chromosome     | GCA_000231095.2  | Obra                   |
|                        |                          | <i>Oryza glaberrima</i>           | 2          | chromosome     | GCA_000576495.1  | Ogla                   |
|                        |                          | <i>Oryza punctata</i>             | 2          | chromosome     | GCA_000573905.1  | Opun                   |
|                        |                          | <i>Oryza rufipogon</i>            | 2          | chromosome     | GCA_000817225.1  | Oruf                   |
|                        |                          | <i>Oryza sativa</i>               | 2          | chromosome     | v7.0             | Osat                   |
|                        | <i>Zizania latifolia</i> | 2                                 | scaffold   | v01            | Zlat             |                        |
|                        | Pooideae                 | <i>Aegilops tauschii</i>          | 2          | chromosome     | v4.0             | Atau                   |
|                        |                          | <i>Brachypodium distachyon</i>    | 2          | chromosome     | v3.1             | Bdis                   |
|                        |                          | <i>Brachypodium stacei</i>        | 2          | chromosome     | v1.1             | Bsta                   |
|                        |                          | <i>Hordeum vulgare</i>            | 2          | chromosome     | /                | Hvul                   |
|                        |                          | <i>Triticum aestivum</i>          | 6          | chromosome     | iwgsc_refseqv1.0 | Taes_A; Taes_B; Taes_D |
|                        |                          | <i>Triticum dicoccoides</i>       | 4          | chromosome     | WEWSeq_v.1.0     | Tdic_A; Tdic_B         |
| <i>Triticum urartu</i> |                          | 2                                 | chromosome | Tu             | Tura             |                        |
| <i>Secale cereale</i>  | 2                        | chromosome                        | Weining    | Scer           |                  |                        |
| PACMAD                 | Panicoideae              | <i>Alloteropsis semialata</i>     | 2          | scaffold       | AUS1_V1.0        | Asem                   |
|                        |                          | <i>Cenchrus americanus</i>        | 2          | chromosome     | Camericanus.prot | Came                   |
|                        |                          | <i>Cenchrus purpureus</i>         | 4          | chromosome     | GWHAORA00000000  | Cpur_A; Cpur_B         |
|                        |                          | <i>Dichanthelium oligosanthes</i> | 2          | scaffold       | ASM163321v2      | Doli                   |
|                        |                          | <i>Digitaria exilis</i>           | 4          | chromosome     | CM05836          | Dexi_A; Dexi_B         |
|                        |                          | <i>Miscanthus sinensis</i>        | 4          | chromosome     | v7.1             | Msin_A; Msin_B         |
|                        |                          | <i>Panicum hallii</i>             | 2          | chromosome     | v3.1             | Phal                   |
|                        |                          | <i>Setaria italica</i>            | 2          | chromosome     | v2.2             | Sita                   |
|                        |                          | <i>Setaria viridis</i>            | 2          | chromosome     | v2.1             | Svir                   |



|               |                               |   |            |                 |                           |
|---------------|-------------------------------|---|------------|-----------------|---------------------------|
|               | <i>Sorghum bicolor</i>        | 2 | chromosome | v3.1.1          | Sbic                      |
|               | <i>Zea mays</i>               | 2 | chromosome | PH207_v1.1      | Zmay                      |
|               | <i>Echinochloa haploclada</i> | 2 | chromosome | v1              | Ehap                      |
|               | <i>Echinochloa oryzicola</i>  | 4 | chromosome | v2              | Eory_AT; Eory_BT          |
|               | <i>Echinochloa crus-galli</i> | 6 | chromosome | v3              | Ecru_AH; Ecru_BH; Ecru_CH |
|               | <i>Echibochloa colona</i>     | 6 | chromosome | v1              | Ecol_DL; Ecol_EL; Ecol_FL |
| Chloridoideae | <i>Cleistogenes songorica</i> | 4 | chromosome | GWHANUQ00000000 | Cson_A; Cson_B            |
|               | <i>Eragrostis curvula</i>     | 2 | scaffold   | /               | Ecur                      |
|               | <i>Eragrostis tef</i>         | 4 | chromosome | v3.1            | Etef_A; Etef_B            |
|               | <i>Eragrostis nindensis</i>   | 4 | contig     | v2.1            | Enin                      |
|               | <i>Oropetium thomaeum</i>     | 2 | contig     | Othomaeum       | Otho                      |
|               | <i>Zoysia japonica</i>        | 4 | scaffold   | Zjaponica_r1.1  | Zjap                      |

**Supplemental Table 2. Core Bx genes (*Bx1* to *Bx6* and *Bx8*) and corresponding native homologs in grass genomes**

| Species                | Genome | Bx         | Bx copy               | Chromosome | Native analogues      |                    |
|------------------------|--------|------------|-----------------------|------------|-----------------------|--------------------|
| <i>A. tauschii</i>     |        | <i>Bx1</i> | AET4Gv20530100        | 4D         | AET5Gv21022100        |                    |
|                        |        |            |                       |            | AET5Gv21022200        |                    |
|                        |        |            |                       |            | AET5Gv21021300        |                    |
| <i>T. urartu</i>       |        | <i>Bx1</i> | TuG1812G0400002465.01 | Tu4        | TuG1812G0500004630.01 |                    |
|                        |        |            |                       |            | TuG1812G0500004636.01 |                    |
|                        |        |            |                       |            | TuG1812G0500004637.01 |                    |
|                        |        |            |                       |            | TuG1812G0500004639.01 |                    |
| <i>T. dicoccoides</i>  | A      | <i>Bx1</i> | TRIDC4AG013300        | 4A         | TRIDC5AG063330        |                    |
|                        |        |            |                       |            | TRIDC5AG063270        |                    |
| <i>T. dicoccoides</i>  | B      | <i>Bx1</i> | TRIDC4BG037100        | 4B         | TRIDC5BG067890        |                    |
|                        |        |            |                       |            |                       | TRIDC5BG067900     |
|                        |        |            |                       |            |                       | TRIDC5BG067910     |
| <i>T. aestivum</i>     | A      | <i>Bx1</i> | TraesCS4A01G097400    | chr4A      | TraesCS5A01G441100    |                    |
|                        |        |            |                       |            |                       | TraesCS5A01G441300 |
|                        |        |            |                       |            |                       | TraesCS5A01G440800 |
|                        |        |            |                       |            |                       | TraesCS5A01G440900 |
| <i>T. aestivum</i>     | B      | <i>Bx1</i> | TraesCS4B01G207100    | chr4B      | TraesCS5B01G445100    |                    |
|                        |        |            |                       |            |                       | TraesCS5B01G445200 |
|                        |        |            |                       |            |                       | TraesCS5B01G444500 |
|                        |        |            |                       |            |                       | TraesCS5B01G444600 |
| <i>T. aestivum</i>     | D      | <i>Bx1</i> | TraesCS4D01G207900    | chr4D      | TraesCS5D01G448400    |                    |
|                        |        |            |                       |            |                       | TraesCS5D01G448500 |
|                        |        |            |                       |            |                       | TraesCS5D01G448200 |
|                        |        |            |                       |            |                       | TraesCS5D01G447800 |
|                        |        |            |                       |            |                       | TraesCS5D01G447900 |
| <i>S. cereale</i>      |        | <i>Bx1</i> | ScWN7R01G203400       | 7R         | ScWN5R01G490200       |                    |
|                        |        |            |                       |            | ScWN5R01G489600       |                    |
|                        |        |            |                       |            | ScWN5R01G489700       |                    |
|                        |        |            |                       |            | ScWN5R01G489500       |                    |
|                        |        |            |                       |            | ScWN5R01G506300       |                    |
|                        |        |            |                       |            | ScWN5R01G490300       |                    |
|                        |        |            |                       |            | ScWN5R01G492000       |                    |
| <i>Z. mays</i>         |        | <i>Bx1</i> | Zm00008a014942        | chr04      | Zm00008a005484        |                    |
| <i>D. oligosanthos</i> |        | <i>Bx1</i> | OEL13077.1            | KV783575.1 |                       |                    |
| <i>E. haploclada</i>   |        | <i>Bx1</i> | eh_chr4.2680          | eh_chr4    | eh_chr1.483           |                    |
| <i>E. oryzicola</i>    | AT     | <i>Bx1</i> | AT04.1672             | AT04       |                       |                    |
| <i>E. oryzicola</i>    | BT     | <i>Bx1</i> | BT04.2196             | BT04       | BT01.27               |                    |
|                        |        |            |                       |            |                       | BT01.28            |
| <i>E. crus-galli</i>   | AH     | <i>Bx1</i> | AH04.2215             | AH04       | AH01.218              |                    |
| <i>E. crus-galli</i>   | BH     | <i>Bx1</i> | BH04.2292             | BH04       | BH01.528              |                    |
|                        |        |            | BH04.2293             |            |                       |                    |
| <i>E. crus-galli</i>   | CH     | <i>Bx1</i> | CH04.2618             | CH04       | CH01.385              |                    |
|                        |        |            |                       |            | CH01.383              |                    |

|                        |     |            |                       |            |            |
|------------------------|-----|------------|-----------------------|------------|------------|
| <i>E. colona</i>       | DL1 | <i>Bx1</i> | DL04.2268             | DL04       | DL01.551   |
| <i>E. colona</i>       | DL2 | <i>Bx1</i> | DL04.2169             | DL04       | DL01.551   |
| <i>E. colona</i>       | EL  | <i>Bx1</i> | EL04.1881             | EL04       | EL01.455   |
|                        |     |            |                       |            | EL01.456   |
| <i>E. colona</i>       | FL  | <i>Bx1</i> | FL04.1773             | FL04       | FL01.461   |
|                        |     |            |                       |            | FL01.462   |
| <i>A. tauschii</i>     |     | <i>Bx2</i> | AET4Gv20530000        | 4D         |            |
| <i>T. urartu</i>       |     | <i>Bx2</i> | TuG1812G0400002466.01 | Tu4        |            |
| <i>T. aestivum</i>     | A   | <i>Bx2</i> | TraesCS4A01G097500    | chr4A      |            |
| <i>T. aestivum</i>     | B   | <i>Bx2</i> | TraesCS4B01G207000    | chr4B      |            |
| <i>T. aestivum</i>     | D   | <i>Bx2</i> | TraesCS4D01G207800    | chr4D      |            |
| <i>S. cereale</i>      |     | <i>Bx2</i> | ScWN7R01G203500       | 7R         |            |
| <i>Z. mays</i>         |     | <i>Bx2</i> | Zm00008a014943        | chr04      |            |
| <i>D. oligosanthos</i> |     | <i>Bx2</i> | OEL13078.1            | KV783575.1 | OEL15381.1 |
| <i>E. haploclada</i>   |     | <i>Bx2</i> | eh_chr4.2681          | eh_chr4    |            |
| <i>E. oryzicola</i>    | AT  | <i>Bx2</i> |                       |            | AT08.48    |
|                        |     |            |                       |            | AT08.49    |
| <i>E. oryzicola</i>    | BT  | <i>Bx2</i> | BT04.2195             | BT04       | BT08.44    |
| <i>E. crus-galli</i>   | AH  | <i>Bx2</i> | AH04.2216             | AH04       |            |
| <i>E. crus-galli</i>   | BH  | <i>Bx2</i> | BH04.2291             | BH04       |            |
| <i>E. crus-galli</i>   | CH  | <i>Bx2</i> | CH04.2619             | CH04       |            |
| <i>E. colona</i>       | DL1 | <i>Bx2</i> | DL04.2269             | DL04       |            |
| <i>E. colona</i>       | DL2 | <i>Bx2</i> | DL04.2172             | DL04       |            |
| <i>E. colona</i>       | EL  | <i>Bx2</i> | EL04.1882             | EL04       |            |
| <i>E. colona</i>       | FL  | <i>Bx2</i> | FL04.1774             | FL04       |            |
| <i>T. urartu</i>       |     | <i>Bx3</i> | TuG1812G0500000122.01 | Tu5        |            |
| <i>T. dicoccoides</i>  | A   | <i>Bx3</i> | TRIDC5AG001550        | 5A         |            |
| <i>T. dicoccoides</i>  | B   | <i>Bx3</i> | TRIDC5BG001410        | 5B         |            |
| <i>T. aestivum</i>     | A   | <i>Bx3</i> | TraesCS5A01G008900    | chr5A      |            |
| <i>T. aestivum</i>     | B   | <i>Bx3</i> | TraesCS5B01G007200    | chr5B      |            |
| <i>T. aestivum</i>     | D   | <i>Bx3</i> | TraesCS5D01G014300    | chr5D      |            |
| <i>S. cereale</i>      |     | <i>Bx3</i> | ScWN2R01G577700       | 2R         |            |
| <i>Z. mays</i>         |     | <i>Bx3</i> | Zm00008a014937        | chr04      |            |
| <i>D. oligosanthos</i> |     | <i>Bx3</i> | OEL13081.1            | KV783575.1 |            |
| <i>E. haploclada</i>   |     | <i>Bx3</i> | eh_chr4.2676          | eh_chr4    |            |
| <i>E. oryzicola</i>    | AT  | <i>Bx3</i> | AT04.1669             | AT04       |            |
| <i>E. oryzicola</i>    | BT  | <i>Bx3</i> | BT04.2201             | BT04       |            |
| <i>E. crus-galli</i>   | AH  | <i>Bx3</i> | AH04.2211             | AH04       |            |
| <i>E. crus-galli</i>   | BH  | <i>Bx3</i> | BH04.2297             | BH04       |            |
| <i>E. crus-galli</i>   | CH  | <i>Bx3</i> | CH04.2613             | CH04       |            |
| <i>E. colona</i>       | DL1 | <i>Bx3</i> | DL04.2265             | DL04       |            |
| <i>E. colona</i>       | DL2 | <i>Bx3</i> | DL04.2165             | DL04       |            |
| <i>E. colona</i>       | EL  | <i>Bx3</i> | EL04.1877             | EL04       |            |
| <i>E. colona</i>       | FL  | <i>Bx3</i> | FL04.1772             | FL04       |            |
| <i>A. tauschii</i>     |     | <i>Bx4</i> | AET5Gv20025200        | 5D         |            |
| <i>T. urartu</i>       |     | <i>Bx4</i> | TuG1812G0500000121.01 | Tu5        |            |
| <i>T. dicoccoides</i>  | A   | <i>Bx4</i> | TRIDC5AG001540        | 5A         |            |

|                        |     |            |                       |            |                       |
|------------------------|-----|------------|-----------------------|------------|-----------------------|
| <i>T. dicoccoides</i>  | B   | <i>Bx4</i> | TRIDC5BG001400        | 5B         |                       |
| <i>T. aestivum</i>     | A   | <i>Bx4</i> | TraesCS5A01G008800    | chr5A      |                       |
| <i>T. aestivum</i>     | B   | <i>Bx4</i> | TraesCS5B01G007100    | chr5B      |                       |
| <i>T. aestivum</i>     | D   | <i>Bx4</i> | TraesCS5D01G014200    | chr5D      |                       |
| <i>S. cereale</i>      |     | <i>Bx4</i> | ScWN2R01G577600       | 2R         |                       |
| <i>Z. mays</i>         |     | <i>Bx4</i> | Zm00008a014938        | chr04      |                       |
| <i>D. oligosanthos</i> |     | <i>Bx4</i> | OEL13080.1            | KV783575.1 |                       |
| <i>E. haploclada</i>   |     | <i>Bx4</i> | eh_chr4.2677          | eh_chr4    |                       |
| <i>E. oryzicola</i>    | AT  | <i>Bx4</i> | AT04.1670             | AT04       |                       |
| <i>E. oryzicola</i>    | BT  | <i>Bx4</i> | BT04.2199             | BT04       |                       |
|                        |     |            | BT04.2200             | BT04       |                       |
| <i>E. crus-galli</i>   | AH  | <i>Bx4</i> | AH04.2212             | AH04       |                       |
| <i>E. crus-galli</i>   | BH  | <i>Bx4</i> | BH04.2296             | BH04       |                       |
| <i>E. crus-galli</i>   | CH  | <i>Bx4</i> | CH04.2614             | CH04       |                       |
| <i>E. colona</i>       | DL1 | <i>Bx4</i> | DL04.2266             | DL04       |                       |
| <i>E. colona</i>       | DL2 | <i>Bx4</i> | DL04.2166             | DL04       |                       |
| <i>E. colona</i>       | EL  | <i>Bx4</i> | EL04.1878             | EL04       |                       |
| <i>A. tauschii</i>     |     | <i>Bx5</i> | AET5Gv20025100        | 5D         | AET2Gv21022600        |
| <i>T. urartu</i>       |     | <i>Bx5</i> | TuG1812G0500000120.01 | Tu5        | TuG1812G0200005151.01 |
| <i>T. dicoccoides</i>  | A   | <i>Bx5</i> | TRIDC5AG001530        | 5A         | TRIDC2AG065830        |
| <i>T. dicoccoides</i>  | B   | <i>Bx5</i> | TRIDC5BG001390        | 5B         |                       |
|                        |     |            | TRIDC5BG004710        | 5B         |                       |
| <i>T. aestivum</i>     | A   | <i>Bx5</i> | TraesCS5A01G008700    | chr5A      |                       |
| <i>T. aestivum</i>     | B   | <i>Bx5</i> | TraesCS5B01G007000    | chr5B      | TraesCS2B01G485100    |
|                        |     |            | TraesCS5B01G029900    | chr5B      |                       |
|                        |     |            | TraesCS5B01G030000    | chr5B      |                       |
| <i>T. aestivum</i>     | D   | <i>Bx5</i> | TraesCS5D01G014100    | chr5D      | TraesCS2D01G464200    |
| <i>S. cereale</i>      |     | <i>Bx5</i> | ScWN2R01G577500       | 2R         |                       |
| <i>Z. mays</i>         |     | <i>Bx5</i> | Zm00008a014940        | chr04      |                       |
| <i>E. haploclada</i>   |     | <i>Bx5</i> | eh_chr4.2678          | eh_chr4    | eh_chr8.27            |
| <i>E. oryzicola</i>    | BT  | <i>Bx5</i> | BT04.2198             | BT04       |                       |
| <i>E. crus-galli</i>   | BH  | <i>Bx5</i> | BH04.2295             | BH04       |                       |
| <i>E. crus-galli</i>   | CH  | <i>Bx5</i> | CH04.2615             | CH04       |                       |
| <i>E. colona</i>       | DL2 | <i>Bx5</i> | DL04.2167             | DL04       |                       |
| <i>E. colona</i>       | FL  | <i>Bx5</i> |                       |            | FL02.2320             |
| <i>A. tauschii</i>     |     | <i>Bx8</i> | AET7Gv20307400        | 7D         | AET7Gv20836200        |
| <i>T. urartu</i>       |     | <i>Bx8</i> | TuG1812G0700001239.01 | Tu7        | TuG1812G0700003832.01 |
| <i>T. dicoccoides</i>  | A   | <i>Bx8</i> | TRIDC7AG014040        | 7A         |                       |
| <i>T. dicoccoides</i>  | B   | <i>Bx8</i> | TRIDC1BG074840        | 1B         |                       |
| <i>T. aestivum</i>     | A   | <i>Bx8</i> |                       |            | TraesCS7A01G344300    |
| <i>T. aestivum</i>     | B   | <i>Bx8</i> | TraesCS7B01G016800    | chr7B      | TraesCS7B01G238800    |
| <i>T. aestivum</i>     | D   | <i>Bx8</i> | TraesCS7D01G116700    | chr7D      |                       |
| <i>S. cereale</i>      |     | <i>Bx8</i> | ScWN4R01G395500       | 4R         |                       |
| <i>Z. mays</i>         |     | <i>Bx8</i> | Zm00008a014941        | chr04      |                       |
| <i>D. oligosanthos</i> |     | <i>Bx8</i> | OEL13079.1            | KV783575.1 |                       |
| <i>E. haploclada</i>   |     | <i>Bx8</i> | eh_chr4.2679          | eh_chr4    |                       |
| <i>E. oryzicola</i>    | AT  | <i>Bx8</i> | AT04.1671             | AT04       |                       |

|                        |     |            |                       |         |                    |
|------------------------|-----|------------|-----------------------|---------|--------------------|
| <i>E. oryzipicola</i>  | BT  | <i>Bx8</i> | BT04.2197             | BT04    |                    |
| <i>E. crus-galli</i>   | AH  | <i>Bx8</i> | AH04.2214             | AH04    |                    |
| <i>E. crus-galli</i>   | BH  | <i>Bx8</i> | BH04.2294             | BH04    |                    |
| <i>E. crus-galli</i>   | CH  | <i>Bx8</i> | CH04.2616             | CH04    |                    |
| <i>E. colona</i>       | DL1 | <i>Bx8</i> | DL04.2267             | DL04    |                    |
| <i>E. colona</i>       | DL2 | <i>Bx8</i> | DL04.2168             | DL04    |                    |
| <i>E. colona</i>       | EL  | <i>Bx8</i> | EL04.1879             | EL04    |                    |
| <i>A. tauschii</i>     |     | <i>Bx6</i> | AET2Gv20088500        | 2D      | AET1Gv20212300     |
| <i>T. urartu</i>       |     | <i>Bx6</i> | TuG1812G0200000785.01 | Tu2     |                    |
| <i>T. dicoccoides</i>  | A   | <i>Bx6</i> |                       |         | TRIDC1AG012200     |
| <i>T. dicoccoides</i>  | B   | <i>Bx6</i> | TRIDC2BG006360        | 2B      | TRIDC1BG014960     |
| <i>T. aestivum</i>     | A   | <i>Bx6</i> | TraesCS2A01G051700    | chr2A   | TraesCS1A01G085800 |
| <i>T. aestivum</i>     | B   | <i>Bx6</i> | TraesCS2B01G066000    | chr2B   | TraesCS1B01G103700 |
| <i>T. aestivum</i>     | D   | <i>Bx6</i> |                       |         | TraesCS1D01G087300 |
| <i>S. cereale</i>      |     | <i>Bx6</i> | ScWN7R01G511600       | 7R      | ScWN1R01G109200    |
|                        |     |            | ScWN7R01G511000       |         |                    |
| <i>Z. mays</i>         |     | <i>Bx6</i> | Zm00008a014884        | chr04   | Zm00008a033413     |
| <i>D. oligosanthos</i> |     | <i>Bx6</i> |                       |         | OEL32741.1         |
| <i>E. haploclada</i>   |     | <i>Bx6</i> | eh_chr9.1288          | eh_chr9 | eh_chr6.2252       |
| <i>E. oryzipicola</i>  | AT  | <i>Bx6</i> | AT09.1105             | AT09    | AT06.700           |
| <i>E. oryzipicola</i>  | BT  | <i>Bx6</i> | BT09.1964             | BT09    | BT06.802           |
|                        |     |            |                       |         | BT06.803           |
| <i>E. crus-galli</i>   | AH  | <i>Bx6</i> | AH09.1073             | AH09    | AH06.747           |
| <i>E. crus-galli</i>   | BH  | <i>Bx6</i> |                       |         | BH06.788           |
|                        |     |            |                       |         | BH06.790           |
| <i>E. crus-galli</i>   | CH  | <i>Bx6</i> | CH09.1289             | CH09    | CH06.821           |
|                        |     |            |                       |         | CH06.823           |
| <i>E. colona</i>       | DL1 | <i>Bx6</i> |                       |         | DL06.2287          |
|                        |     |            |                       |         | DL06.2288          |
| <i>E. colona</i>       | DL2 | <i>Bx6</i> | DL09.1179             | DL09    | DL06.2287          |
|                        |     |            |                       |         | DL06.2288          |
| <i>E. colona</i>       | EL  | <i>Bx6</i> | EL09.1058             | EL09    | EL06.1910          |
|                        |     |            | EL09.1059             |         | EL06.1911          |
|                        |     |            |                       |         | EL06.1913          |
| <i>E. colona</i>       | FL  | <i>Bx6</i> | FL09.1015             | FL09    | FL06.479           |
|                        |     |            |                       |         | FL06.480           |
| <i>D. exilis</i>       | A   | <i>Bx6</i> | Dexi7A01G0007160      | 7A      | Dexi4A01G0007650   |
|                        |     |            |                       |         | Dexi4A01G0007670   |
| <i>D. exilis</i>       | B   | <i>Bx6</i> | Dexi7B01G0008100      | 7B      | Dexi4B01G0007960   |
|                        |     |            |                       |         | Dexi4B01G0007980   |
|                        |     |            |                       |         | Dexi4B01G0007990   |
| <i>S. italica</i>      |     | <i>Bx6</i> | Seita.7G107200        | 4       | Seita.4G083700     |
| <i>S. viridis</i>      |     | <i>Bx6</i> | Sevir.7G114500        | 4       | Sevir.4G082900     |



**Supplemental Table 3. Topology tests of two hypothesis on transfer of Bx genes in Triticeae from Panicoideae**

| Datasets          | Alignment with MAFFT |               |               | Alignment with MAFFT and Gblocks trimming |               |               |
|-------------------|----------------------|---------------|---------------|-------------------------------------------|---------------|---------------|
| Topologies tested | PO vs Non-PO         |               |               | PO vs Non-PO                              |               |               |
|                   | AU                   | RELL          | SH            | AU                                        | RELL          | SH            |
| <i>Bx1</i>        | 1.0000/4.98e-34      | 1.0000/0.0000 | 1.0000/0.0000 | 0.9999/5.41e-5                            | 1.0000/0.0000 | 1.0000/0.0000 |
| <i>Bx2</i>        | 1.0000/9.72e-9       | 1.0000/0.0000 | 1.0000/0.0000 | 0.9996/0.0004                             | 1.0000/0.0000 | 1.0000/0.0000 |
| <i>Bx3/4/5</i>    | 1.0000/1.43e-5       | 1.0000/0.0000 | 1.0000/0.0000 | 0.9981/0.0019                             | 1.0000/0.0000 | 1.0000/0.0000 |
| <i>Bx8</i>        | 1.0000/2.58e-44      | 1.0000/0.0000 | 1.0000/0.0000 | 1.0000/5.75e-5                            | 1.0000/0.0000 | 1.0000/0.0000 |
| <i>Bx6</i>        | 1.0000/1.18e-6       | 1.0000/0.0000 | 1.0000/0.0000 | 1.0000/4.4e-61                            | 1.0000/0.0000 | 1.0000/0.0000 |

PO, Panicoideae origin; non-PO, non-Panicoideae origin; AU, approximately unbiased test; REll, resampling estimated log-likelihood method; SH, Shimodaira-Hasegawa test.
